# Supplementary material for: Proteomic Analysis Reveals Salt-Tolerant Mechanism in Soybean Applied with Plant-Derived Smoke Solution
Source: Int J Mol Sci. 2023 Sep 6;24(18):13734. doi: 10.3390/ijms241813734 (PMC10530690; doi:10.3390/ijms241813734)
Supplement: Supplementary file 1 [file ijms-24-13734-s001.zip › Tables S2 and S3.xlsx]

## Sheet: Table S2
Table S2. List of changed proteins in soybean root under salt stress compared with control.
#NAME?	p-value	Difference	Accession	Description	Biological Process	Gene ontology (biological process)	XXX	Cellular Component	Gene ontology (cellular component)	XXX	Molecular Function	Gene ontology (molecular function)	XXX	Gene ontology (GO)	Coverage in Percent	Number of Peptides	Number of AAs	MW in kDa	calc pI
4.4821	3.29533e-05	7.27139	K7MB33	Uncharacterized protein	other biological processes	regulation of phosphoprotein phosphatase activity [GO:0043666]	regulation of phosphoprotein phosphatase activity [GO:0043666]	………………..		NA	enzyme regulator activity;other molecular function	protein phosphatase binding [GO:0019903]	enzyme regulator activity	protein phosphatase binding [GO:0019903];regulation of phosphoprotein phosphatase activity [GO:0043666]	13	7	838	92.4	4.69
2.79825	0.00159128	4.06035	I1KF11	Dihydroorotase	other metabolic processes	'de novo' pyrimidine nucleobase biosynthetic process [GO:0006207];pyrimidine nucleotide biosynthetic process [GO:0006221]	de novo' pyrimidine nucleobase biosynthetic process [GO:0006207]		chloroplast [GO:0009507]	chloroplast [GO:0009507]	other molecular function	dihydroorotase activity [GO:0004151]	dihydroorotase activity [GO:0004151]	chloroplast [GO:0009507];'de novo' pyrimidine nucleobase biosynthetic process [GO:0006207];dihydroorotase activity [GO:0004151];pyrimidine nucleotide biosynthetic process [GO:0006221]	24	6	346	38.4	6.98
1.69665	0.0201072	4.03247	A0A0R0HMK4	Phosphatidylinositol-specific phospholipase C X domain-containing protein	other metabolic processes	lipid metabolic process [GO:0006629]	lipid metabolic process [GO:0006629]			NA	other molecular function	phosphoric diester hydrolase activity [GO:0008081]	phosphoric diester hydrolase activity [GO:0008081]	lipid metabolic process [GO:0006629];phosphoric diester hydrolase activity [GO:0008081]	8	2	421	46.1	7.5
1.59802	0.0252338	3.61902	A0A0R0IZE4	40S ribosomal protein SA	cell organization and biogenesis;other metabolic processes;protein metabolism	ribosomal small subunit assembly [GO:0000028];translation [GO:0006412]	cell organization and biogenesis	..	cytosolic small ribosomal subunit [GO:0022627]	cytosolic small ribosomal subunit [GO:0022627]	other molecular function	structural constituent of ribosome [GO:0003735]	structural constituent of ribosome [GO:0003735]	cytosolic small ribosomal subunit [GO:0022627];ribosomal small subunit assembly [GO:0000028];structural constituent of ribosome [GO:0003735];translation [GO:0006412]	48	15	310	33.9	5.26
1.30606	0.0494244	3.13354	I1JY29	Alcohol dehydrogenase	other metabolic processes	formaldehyde catabolic process [GO:0046294]	\	cytosol	cytosol [GO:0005829]	cytosol [GO:0005829]	other molecular function	alcohol dehydrogenase activity, zinc-dependent [GO:0004024];S-(hydroxymethyl)glutathione dehydrogenase activity [GO:0051903];zinc ion binding [GO:0008270]	alcohol dehydrogenase activity	alcohol dehydrogenase activity, zinc-dependent [GO:0004024];cytosol [GO:0005829];formaldehyde catabolic process [GO:0046294];S-(hydroxymethyl)glutathione dehydrogenase activity [GO:0051903];zinc ion binding [GO:0008270]	27	6	381	41.2	6
3.06942	0.000852267	3.02912	I1KC24	CBFD_NFYB_HMF domain-containing protein	other biological processes		other biological processes	nucleus	nucleus [GO:0005634]	nucleus [GO:0005634]	other molecular function	DNA-binding transcription factor activity [GO:0003700];protein heterodimerization activity [GO:0046982]	DNA-binding	DNA-binding transcription factor activity [GO:0003700];nucleus [GO:0005634];protein heterodimerization activity [GO:0046982]	7	2	229	25	5.38
1.92047	0.0120098	2.95257	K7MJ40	GOLD domain-containing protein			NA			NA			NA		22	6	433	49.5	5.87
3.55168	0.000280748	2.60888	I1L2Y7	Glycosyltransferase			NA		intracellular membrane-bounded organelle [GO:0043231]	intracellular membrane-bounded organelle [GO:0043231]	other molecular function	transferase activity, transferring hexosyl groups [GO:0016758];UDP-glycosyltransferase activity [GO:0008194]	transferase activity	intracellular membrane-bounded organelle [GO:0043231];transferase activity, transferring hexosyl groups [GO:0016758];UDP-glycosyltransferase activity [GO:0008194]	8	3	473	52.7	6.02
2.16573	0.0068277	2.60885	A0A0R0I6S7	Uncharacterized protein	other biological processes;signal transduction;stress response		stress response	ER/Golgi;other membranes		ER/Golgi	other molecular function	heme binding [GO:0020037];iron ion binding [GO:0005506];monooxygenase activity [GO:0004497];oxidoreductase activity, acting on paired donors, with incorporation or reduction of molecular oxygen [GO:0016705]	heme binding	heme binding [GO:0020037];iron ion binding [GO:0005506];monooxygenase activity [GO:0004497];oxidoreductase activity, acting on paired donors, with incorporation or reduction of molecular oxygen [GO:0016705]	11	3	461	52.9	7.66
1.82219	0.0150595	2.48498	I1KN97	DUF3700 domain-containing protein			NA			NA			NA		32	5	235	25.4	5.83
2.04936	0.00892562	2.38916	I1JJN9	Phosphopyruvate hydratase	other biological processes;other metabolic processes	glycolytic process [GO:0006096]	glycolytic process [GO:0006096]	cytosol	phosphopyruvate hydratase complex [GO:0000015]	cytosol	other molecular function	magnesium ion binding [GO:0000287];phosphopyruvate hydratase activity [GO:0004634]	magnesium ion binding	glycolytic process [GO:0006096];magnesium ion binding [GO:0000287];phosphopyruvate hydratase activity [GO:0004634];phosphopyruvate hydratase complex [GO:0000015]	28	9	473	51.5	5.76
1.92379	0.0119182	2.3003	I1L4W3	Phosphoenolpyruvate carboxykinase (ATP)	other metabolic processes	gluconeogenesis [GO:0006094]	gluconeogenesis [GO:0006094]	cytosol	cytosol [GO:0005829]	cytosol	other molecular function	ATP binding [GO:0005524];phosphoenolpyruvate carboxykinase (ATP) activity [GO:0004612]	ATP binding	ATP binding [GO:0005524];cytosol [GO:0005829];gluconeogenesis [GO:0006094];phosphoenolpyruvate carboxykinase (ATP) activity [GO:0004612]	21	9	661	73.1	7.49
1.38484	0.0412253	2.00523	A0A0R0K553	Fe2OG dioxygenase domain-containing protein			NA			NA	other molecular function	dioxygenase activity [GO:0051213];metal ion binding [GO:0046872]	metal ion binding	dioxygenase activity [GO:0051213];metal ion binding [GO:0046872]	37	8	307	34.8	5.58
1.72985	0.0186271	1.99455	I1L7Y6	U1 small nuclear ribonucleoprotein C	cell organization and biogenesis;other metabolic processes;RNA metabolism OR transcription	mRNA 5'-splice site recognition [GO:0000395];spliceosomal snRNP assembly [GO:0000387]	cell organization and biogenesis	nucleus	commitment complex [GO:0000243];U1 snRNP [GO:0005685];U2-type prespliceosome [GO:0071004]	nucleus	nucleic acid binding activity;other molecular function	mRNA binding [GO:0003729];pre-mRNA 5'-splice site binding [GO:0030627];U1 snRNA binding [GO:0030619];zinc ion binding [GO:0008270]	mRNA binding	commitment complex [GO:0000243];mRNA 5'-splice site recognition [GO:0000395];mRNA binding [GO:0003729];pre-mRNA 5'-splice site binding [GO:0030627];spliceosomal snRNP assembly [GO:0000387];U1 snRNA binding [GO:0030619];U1 snRNP [GO:0005685];U2-type prespliceosome [GO:0071004];zinc ion binding [GO:0008270]	17	2	206	22.2	9.03
1.99385	0.0101425	1.98982	C6SYN0	Uncharacterized protein			NA			NA			NA		19	3	236	27.1	4.7
1.93987	0.0114848	1.98394	A0A0R0F139	PKS_ER domain-containing protein	other metabolic processes	lignin biosynthetic process [GO:0009809]	lignin biosynthetic process [GO:0009809]			NA	other molecular function	cinnamyl-alcohol dehydrogenase activity [GO:0045551];oxidoreductase activity, acting on the CH-OH group of donors, NAD or NADP as acceptor [GO:0016616]	cinnamyl-alcohol dehydrogenase activity	cinnamyl-alcohol dehydrogenase activity [GO:0045551];lignin biosynthetic process [GO:0009809];oxidoreductase activity, acting on the CH-OH group of donors, NAD or NADP as acceptor [GO:0016616]	69	14	361	39.3	7.28
3.22907	0.000590105	1.91851	I1KH77	Midasin	cell organization and biogenesis;other metabolic processes;RNA metabolism OR transcription	ribosomal large subunit assembly [GO:0000027];rRNA processing [GO:0006364]	cell organization and biogenesis	nucleus;other cell component	nucleus [GO:0005634]	nucleus [GO:0005634]	other molecular function	ATP binding [GO:0005524];ATPase activity [GO:0016887]	ATP binding	ATP binding [GO:0005524];ATPase activity [GO:0016887];nucleus [GO:0005634];ribosomal large subunit assembly [GO:0000027];rRNA processing [GO:0006364]	1	3	5435	618.8	5.66
3.35133	0.000445321	1.87264	I1ML03	Uncharacterized protein			NA			NA	other molecular function	transferase activity, transferring acyl groups other than amino-acyl groups [GO:0016747]	transferase activity	transferase activity, transferring acyl groups other than amino-acyl groups [GO:0016747]	11	3	459	50.7	8.02
1.61164	0.0244547	1.81369	Q9FQE8	Glutathione S-transferase	other metabolic processes	glutathione metabolic process [GO:0006749]	glutathione metabolic process [GO:0006749]	other cell component	cytoplasm [GO:0005737]	cytoplasm [GO:0005737]	other molecular function	glutathione transferase activity [GO:0004364]	glutathione transferase activity [GO:0004364]	cytoplasm [GO:0005737];glutathione metabolic process [GO:0006749];glutathione transferase activity [GO:0004364]	35	7	219	25.6	5.97
1.56998	0.0269167	1.81332	C6TMH1	ZnMc domain-containing protein	cell organization and biogenesis;other metabolic processes;protein metabolism	collagen catabolic process [GO:0030574];extracellular matrix organization [GO:0030198]	cell organization and biogenesis	extracellular matrix;other membranes	extracellular matrix [GO:0031012];integral component of membrane [GO:0016021]	extracellular matrix	other molecular function	metalloendopeptidase activity [GO:0004222];zinc ion binding [GO:0008270]	zinc ion binding	collagen catabolic process [GO:0030574];extracellular matrix [GO:0031012];extracellular matrix organization [GO:0030198];integral component of membrane [GO:0016021];metalloendopeptidase activity [GO:0004222];zinc ion binding [GO:0008270]	12	2	357	40.1	5.63
1.9086	0.0123423	1.80595	I1MAE6	PKS_ER domain-containing protein	other metabolic processes	formaldehyde catabolic process [GO:0046294]	formaldehyde catabolic process [GO:0046294]	cytosol	cytosol [GO:0005829]	cytosol [GO:0005829]	other molecular function	alcohol dehydrogenase activity, zinc-dependent [GO:0004024];S-(hydroxymethyl)glutathione dehydrogenase activity [GO:0051903];zinc ion binding [GO:0008270]	alcohol dehydrogenase activity	alcohol dehydrogenase activity, zinc-dependent [GO:0004024];cytosol [GO:0005829];formaldehyde catabolic process [GO:0046294];S-(hydroxymethyl)glutathione dehydrogenase activity [GO:0051903];zinc ion binding [GO:0008270]	19	8	380	40.8	6.52
2.20677	0.00621203	1.80366	A0A0R0F3J1	Pectate_lyase_3 domain-containing protein	other metabolic processes	carbohydrate metabolic process [GO:0005975];cell wall organization [GO:0071555]	cell wall organization	other cell component	extracellular region [GO:0005576]	extracellular region [GO:0005576]	other molecular function	polygalacturonase activity [GO:0004650]	polygalacturonase activity [GO:0004650]	carbohydrate metabolic process [GO:0005975];cell wall organization [GO:0071555];extracellular region [GO:0005576];polygalacturonase activity [GO:0004650]	25	6	484	53.2	6.84
3.59102	0.000256435	1.7572	Q41245	Lipoxygenase (Fragment)			NA			NA	other molecular function	metal ion binding [GO:0046872];oxidoreductase activity, acting on single donors with incorporation of molecular oxygen, incorporation of two atoms of oxygen [GO:0016702]	metal ion binding	metal ion binding [GO:0046872];oxidoreductase activity, acting on single donors with incorporation of molecular oxygen, incorporation of two atoms of oxygen [GO:0016702]	49	8	115	13.1	5.63
1.61379	0.0243337	1.74925	I1JLC8	Protein SLE2	other biological processes	protein stabilization [GO:0050821];response to abscisic acid [GO:0009737]	protein stabilization	cytosol	cytosol [GO:0005829]	cytosol [GO:0005829]			NA	cytosol [GO:0005829];protein stabilization [GO:0050821];response to abscisic acid [GO:0009737]	41	5	105	11.5	5.6
1.57787	0.026432	1.70574	I1JMC0	Hydroxyisourate hydrolase	other metabolic processes	purine nucleobase metabolic process [GO:0006144]	purine nucleobase metabolic process [GO:0006144]			NA	other molecular function	hydroxyisourate hydrolase activity [GO:0033971]	hydroxyisourate hydrolase activity [GO:0033971]	hydroxyisourate hydrolase activity [GO:0033971];purine nucleobase metabolic process [GO:0006144]	11	2	331	36.2	7.53
2.64923	0.0022427	1.55398	I1KEA6	Uncharacterized protein			NA	other cell component	cytoplasm [GO:0005737]	cytoplasm [GO:0005737]	other molecular function	acid-amino acid ligase activity [GO:0016881];indole-3-acetic acid amido synthetase activity [GO:0010279]	acid-amino acid ligase activity	acid-amino acid ligase activity [GO:0016881];cytoplasm [GO:0005737];indole-3-acetic acid amido synthetase activity [GO:0010279]	6	2	609	68.8	6.83
2.02013	0.00954696	1.54174	I1LS06	Uncharacterized protein	other metabolic processes		other metabolic processes			NA		catalytic activity [GO:0003824]	catalytic activity [GO:0003824]	catalytic activity [GO:0003824]	14	2	317	35	6.92
1.37308	0.0423565	1.52209	Q7M213	Metallothionein			NA			NA	other molecular function	metal ion binding [GO:0046872]	metal ion binding [GO:0046872]	metal ion binding [GO:0046872]	42	3	79	7.9	4.82
1.87854	0.0132269	1.35466	C6TK94	Uncharacterized protein			NA			NA			NA		16	5	418	45.6	5.66
3.33708	0.000460173	1.34477	K7KYH7	C2H2-type domain-containing protein	other metabolic processes;RNA metabolism OR transcription	mRNA processing [GO:0006397]	RNA metabolism OR transcription	nucleus		NA		nucleic acid binding [GO:0003676]	nucleic acid binding [GO:0003676]	mRNA processing [GO:0006397];nucleic acid binding [GO:0003676]	12	6	714	80.1	7.74
1.83833	0.0145102	1.31085	Q9SWB2	Seed maturation protein PM41			NA			NA			NA		31	2	78	8.2	4.97
1.59909	0.0251718	1.30563	A0A0R0HQN9	Uncharacterized protein	other metabolic processes	L-arabinose metabolic process [GO:0046373]	L-arabinose metabolic process [GO:0046373]			NA	other molecular function	alpha-L-arabinofuranosidase activity [GO:0046556]	alpha-L-arabinofuranosidase activity [GO:0046556]	alpha-L-arabinofuranosidase activity [GO:0046556];L-arabinose metabolic process [GO:0046373]	13	6	729	81	5.71
1.79599	0.0159961	1.29847	C6SYG0	MPN domain-containing protein			NA	ER/Golgi;other membranes	ER membrane protein complex [GO:0072546]	ER/Golgi			NA	ER membrane protein complex [GO:0072546]	42	4	204	22.9	5.78
3.255	0.000555898	1.29777	I1N5R6	PKS_ER domain-containing protein			NA			NA	other molecular function	oxidoreductase activity [GO:0016491];zinc ion binding [GO:0008270]	zinc ion binding	oxidoreductase activity [GO:0016491];zinc ion binding [GO:0008270]	23	6	320	34.3	5.74
1.90194	0.0125332	1.29052	I1KMW4	TPR_REGION domain-containing protein			NA			NA			NA		9	3	478	50	8.18
1.38077	0.0416126	1.21949	I1LCK4	Uncharacterized protein	cell organization and biogenesis;transport	vacuolar transport [GO:0007034]	cell organization and biogenesis	other cytoplasmic organelle		other cytoplasmic organelle			NA	vacuolar transport [GO:0007034]	18	2	237	26.5	4.89
3.08178	0.00082837	1.15893	K7MZJ0	Sucrose synthase	other metabolic processes	sucrose metabolic process [GO:0005985]	sucrose metabolic process [GO:0005985]			NA	other molecular function	sucrose synthase activity [GO:0016157]	sucrose synthase activity [GO:0016157]	sucrose metabolic process [GO:0005985];sucrose synthase activity [GO:0016157]	38	23	812	92.2	6.38
1.43719	0.0365438	1.15064	A0A0R0EF73	Uncharacterized protein	transport		transport			NA			NA		3	5	1652	183.5	6.18
1.67641	0.0210662	1.12293	O22378	Metallothionein-II protein			NA			NA	other molecular function	zinc ion binding [GO:0008270]	zinc ion binding [GO:0008270]	zinc ion binding [GO:0008270]	22	2	85	8.3	7.33
2.1363	0.00730637	1.1	O23957	Dehydrin	other biological processes;stress response	cold acclimation [GO:0009631];response to abscisic acid [GO:0009737];response to water deprivation [GO:0009414]	stress response	cytosol	cytosol [GO:0005829]	cytosol [GO:0005829]			NA	cold acclimation [GO:0009631];cytosol [GO:0005829];response to abscisic acid [GO:0009737];response to water deprivation [GO:0009414]	18	3	166	17.3	9.23
4.40673	3.91986e-05	1.08833	I1JR24	ATP citrate synthase			NA			NA	other molecular function	ATP binding [GO:0005524]	ATP binding [GO:0005524]	ATP binding [GO:0005524]	23	6	423	46.7	5.47
2.37175	0.00424867	1.06716	I1JTG3	SERPIN domain-containing protein	other biological processes	negative regulation of endopeptidase activity [GO:0010951]	negative regulation of endopeptidase activity [GO:0010951]	non-structural extracellular	extracellular space [GO:0005615]	non-structural extracellular	enzyme regulator activity	serine-type endopeptidase inhibitor activity [GO:0004867]	enzyme regulator activity	extracellular space [GO:0005615];negative regulation of endopeptidase activity [GO:0010951];serine-type endopeptidase inhibitor activity [GO:0004867]	15	5	389	42.7	6.57
2.25274	0.00558805	1.06314	A0A0R0HTY5	Uncharacterized protein	other biological processes		other biological processes	other membranes;plasma membrane	integral component of membrane [GO:0016021]	plasma membrane	other molecular function	calcium ion binding [GO:0005509];oxidoreductase activity, acting on NAD(P)H, oxygen as acceptor [GO:0050664];peroxidase activity [GO:0004601]	calcium ion binding	calcium ion binding [GO:0005509];integral component of membrane [GO:0016021];oxidoreductase activity, acting on NAD(P)H, oxygen as acceptor [GO:0050664];peroxidase activity [GO:0004601]	5	3	825	94.3	9.06
2.47304	0.00336483	1.05997	K7KGC7	Sucrose synthase	other metabolic processes	sucrose metabolic process [GO:0005985]	sucrose metabolic process [GO:0005985]			NA	other molecular function	sucrose synthase activity [GO:0016157]	sucrose synthase activity [GO:0016157]	sucrose metabolic process [GO:0005985];sucrose synthase activity [GO:0016157]	36	23	812	92.2	6.13
1.89111	0.0128497	1.03722	I1JMV6	Uncharacterized protein			NA			NA	other molecular function	3-hydroxyisobutyryl-CoA hydrolase activity [GO:0003860]	3-hydroxyisobutyryl-CoA hydrolase activity [GO:0003860]	3-hydroxyisobutyryl-CoA hydrolase activity [GO:0003860]	15	2	407	45.2	5.81
1.94007	0.0114798	1.02885	I1JMF8	PKS_ER domain-containing protein			NA			NA	other molecular function	oxidoreductase activity [GO:0016491]	oxidoreductase activity [GO:0016491]	oxidoreductase activity [GO:0016491]	8	3	346	38.5	6.68
2.06798	0.0085511	1.02315	I1MGV5	Uncharacterized protein	transport		transport	other membranes	integral component of membrane [GO:0016021]	integral component of membrane [GO:0016021]	other molecular function;transporter activity	ATP binding [GO:0005524];copper ion binding [GO:0005507];copper transmembrane transporter activity, phosphorylative mechanism [GO:0043682]	ATP binding	ATP binding [GO:0005524];copper ion binding [GO:0005507];copper transmembrane transporter activity, phosphorylative mechanism [GO:0043682];integral component of membrane [GO:0016021]	5	3	996	106.3	5.12
2.38274	0.00414247	1.01542	O23958	Metallothionein-II protein			NA			NA	other molecular function	zinc ion binding [GO:0008270]	zinc ion binding [GO:0008270]	zinc ion binding [GO:0008270]	89	5	85	8.1	6.95
2.55513	0.00278531	1.00003	B4YB09	Phytochrome	other biological processes;other metabolic processes;protein metabolism;signal transduction	detection of visible light [GO:0009584];protein-chromophore linkage [GO:0018298];protein-tetrapyrrole linkage [GO:0017006];red, far-red light phototransduction [GO:0009585];regulation of transcription, DNA-templated [GO:0006355]	protein metabolism			NA	kinase activity;other molecular function	phosphorelay sensor kinase activity [GO:0000155];photoreceptor activity [GO:0009881];protein homodimerization activity [GO:0042803]	phosphorelay sensor kinase activity	detection of visible light [GO:0009584];phosphorelay sensor kinase activity [GO:0000155];photoreceptor activity [GO:0009881];protein homodimerization activity [GO:0042803];protein-chromophore linkage [GO:0018298];protein-tetrapyrrole linkage [GO:0017006];red, far-red light phototransduction [GO:0009585];regulation of transcription, DNA-templated [GO:0006355]	23	16	1122	124.1	6.64
1.56099	0.0274796	0.968708	C6TDB4	SHSP domain-containing protein			NA			NA			NA		13	3	225	25.6	7.49
2.63425	0.00232141	0.964112	I1MUP6	Uncharacterized protein			NA			NA			NA		14	5	420	46.4	5.11
1.32493	0.0473224	0.959439	K7LHH3	CBFD_NFYB_HMF domain-containing protein	other biological processes	regulation of transcription, DNA-templated [GO:0006355]	regulation of transcription, DNA-templated [GO:0006355]	nucleus	nucleus [GO:0005634]	nucleus [GO:0005634]	nucleic acid binding activity;other molecular function	protein heterodimerization activity [GO:0046982];sequence-specific DNA binding [GO:0043565]	protein heterodimerization activity	nucleus [GO:0005634];protein heterodimerization activity [GO:0046982];regulation of transcription, DNA-templated [GO:0006355];sequence-specific DNA binding [GO:0043565]	29	2	160	17.3	6.79
1.56096	0.0274813	0.957217	Q00M88	N-hydroxycinnamoyl/benzoyltransferase 2			NA			NA	other molecular function	transferase activity, transferring acyl groups other than amino-acyl groups [GO:0016747]	transferase activity	transferase activity, transferring acyl groups other than amino-acyl groups [GO:0016747]	8	3	460	51.6	6.77
2.2256	0.00594846	0.946279	I1N058	Uncharacterized protein	DNA metabolism;other biological processes;other metabolic processes;protein metabolism;stress response	proteasomal ubiquitin-independent protein catabolic process [GO:0010499]	DNA metabolism	cytosol;nucleus	cytosol [GO:0005829];nucleus [GO:0005634]	cytosol	enzyme regulator activity;other molecular function	lysine-acetylated histone binding [GO:0070577];peptidase activator activity [GO:0016504];proteasome binding [GO:0070628]	proteasome binding [	cytosol [GO:0005829];lysine-acetylated histone binding [GO:0070577];nucleus [GO:0005634];peptidase activator activity [GO:0016504];proteasomal ubiquitin-independent protein catabolic process [GO:0010499];proteasome binding [GO:0070628]	12	14	1815	203.2	7.15
2.13628	0.00730675	0.94309	C6SVT0	Usp domain-containing protein			NA			NA			NA		48	7	162	18	7.15
2.61892	0.00240481	0.932885	Q00M86	N-hydroxycinnamoyl/benzoyltransferase 4			NA			NA	other molecular function	transferase activity, transferring acyl groups other than amino-acyl groups [GO:0016747]	transferase activity	transferase activity, transferring acyl groups other than amino-acyl groups [GO:0016747]	6	2	469	52.5	6.98
4.36732	4.29224e-05	0.926352	I1M307	Bulb-type lectin domain-containing protein			NA			NA			NA		21	8	435	48.8	6.64
1.74815	0.0178589	0.908221	C6TLE0	DUF3700 domain-containing protein			NA			NA			NA		20	4	254	28.1	6.79
1.91169	0.012255	0.905203	Q2LAJ9	Cytochrome P450 monooxygenase CYP51G1 (Fragment)			NA			NA	other molecular function	heme binding [GO:0020037];iron ion binding [GO:0005506];monooxygenase activity [GO:0004497];oxidoreductase activity, acting on paired donors, with incorporation or reduction of molecular oxygen [GO:0016705]	heme binding	heme binding [GO:0020037];iron ion binding [GO:0005506];monooxygenase activity [GO:0004497];oxidoreductase activity, acting on paired donors, with incorporation or reduction of molecular oxygen [GO:0016705]	20	7	475	53.8	7.4
1.8844	0.0130496	0.903085	K7L1E9	Fe2OG dioxygenase domain-containing protein			NA			NA	other molecular function	dioxygenase activity [GO:0051213];metal ion binding [GO:0046872]	metal ion binding	dioxygenase activity [GO:0051213];metal ion binding [GO:0046872]	19	4	306	34.7	5.71
1.49298	0.0321382	0.898977	A0A1A9C8Q3	Chalcone-flavonone isomerase family protein	other metabolic processes		other metabolic processes			NA	other molecular function	intramolecular lyase activity [GO:0016872]	intramolecular lyase activity [GO:0016872]	intramolecular lyase activity [GO:0016872]	59	11	218	23.2	7.05
1.72439	0.0188629	0.894078	C6TNF9	Pyr_redox_2 domain-containing protein	other metabolic processes		other metabolic processes	other cell component	cytoplasm [GO:0005737]	cytoplasm [GO:0005737]	other molecular function	electron-transferring-flavoprotein dehydrogenase activity [GO:0004174];flavin adenine dinucleotide binding [GO:0050660]	electron-transferring-flavoprotein dehydrogenase activity	cytoplasm [GO:0005737];electron-transferring-flavoprotein dehydrogenase activity [GO:0004174];flavin adenine dinucleotide binding [GO:0050660]	33	11	360	39.1	9.38
1.68969	0.0204319	0.889428	I1JQ51	Uncharacterized protein	other biological processes;other metabolic processes;RNA metabolism OR transcription	deadenylation-dependent decapping of nuclear-transcribed mRNA [GO:0000290];deadenylation-independent decapping of nuclear-transcribed mRNA [GO:0031087]	RNA metabolism OR transcription	other cell component	P-body [GO:0000932]	P-body [GO:0000932]	enzyme regulator activity;nucleic acid binding activity	enzyme activator activity [GO:0008047]	enzyme regulator activity	deadenylation-dependent decapping of nuclear-transcribed mRNA [GO:0000290];deadenylation-independent decapping of nuclear-transcribed mRNA [GO:0031087];enzyme activator activity [GO:0008047];P-body [GO:0000932]	11	2	359	39.7	5.48
1.59189	0.0255921	0.883781	C6TB83	Peroxidase	other biological processes;other metabolic processes;stress response	hydrogen peroxide catabolic process [GO:0042744];response to oxidative stress [GO:0006979]	stress response	non-structural extracellular	extracellular region [GO:0005576]	non-structural extracellular	other molecular function	heme binding [GO:0020037];metal ion binding [GO:0046872];peroxidase activity [GO:0004601]	heme binding	extracellular region [GO:0005576];heme binding [GO:0020037];hydrogen peroxide catabolic process [GO:0042744];metal ion binding [GO:0046872];peroxidase activity [GO:0004601];response to oxidative stress [GO:0006979]	40	7	355	38.6	6.23
2.3269	0.00471088	0.881366	Q9FQF1	Glutathione S-transferase GST 7	other metabolic processes		other metabolic processes			NA	other molecular function	glutathione transferase activity [GO:0004364]	glutathione transferase activity [GO:0004364]	glutathione transferase activity [GO:0004364]	32	6	225	26	7.43
2.17762	0.00664327	0.873337	I1JE14	Glycosyltransferase			NA		intracellular membrane-bounded organelle [GO:0043231]	intracellular membrane-bounded organelle [GO:0043231]	other molecular function	quercetin 3-O-glucosyltransferase activity [GO:0080043];quercetin 7-O-glucosyltransferase activity [GO:0080044];UDP-glycosyltransferase activity [GO:0008194]	quercetin 3-O-glucosyltransferase activity	intracellular membrane-bounded organelle [GO:0043231];quercetin 3-O-glucosyltransferase activity [GO:0080043];quercetin 7-O-glucosyltransferase activity [GO:0080044];UDP-glycosyltransferase activity [GO:0008194]	11	3	475	53.2	6.01
1.33454	0.0462875	0.852705	I1K6P4	CAP-Gly domain-containing protein	developmental processes;other biological processes	cell division [GO:0051301];embryo development ending in seed dormancy [GO:0009793]	cell division	cytosol;nucleus;other cell component	cytosol [GO:0005829];nucleus [GO:0005634];phragmoplast [GO:0009524]	cytosol			NA	cell division [GO:0051301];cytosol [GO:0005829];embryo development ending in seed dormancy [GO:0009793];nucleus [GO:0005634];phragmoplast [GO:0009524]	12	2	243	27.1	5.69
1.96569	0.010822	0.827954	K7K653	Uncharacterized protein			NA			NA			NA		9	3	606	65.1	8.31
1.32917	0.0468632	0.822864	K7LAM2	Ubiquinone biosynthesis monooxygenase COQ6, mitochondrial	other metabolic processes	ubiquinone biosynthetic process [GO:0006744]	ubiquinone biosynthetic process [GO:0006744]	mitochondrion;other membranes	extrinsic component of mitochondrial inner membrane [GO:0031314];mitochondrion [GO:0005739]	mitochondrion	other molecular function	FAD binding [GO:0071949];oxidoreductase activity [GO:0016491];oxidoreductase activity, acting on paired donors, with incorporation or reduction of molecular oxygen, NAD(P)H as one donor, and incorporation of one atom of oxygen [GO:0016709];oxidoreductase activity, acting on paired donors, with incorporation or reduction of molecular oxygen, reduced flavin or flavoprotein as one donor, and incorpo…	oxidoreductase activity	extrinsic component of mitochondrial inner membrane [GO:0031314];FAD binding [GO:0071949];mitochondrion [GO:0005739];oxidoreductase activity [GO:0016491];oxidoreductase activity, acting on paired donors, with incorporation or reduction of molecular oxygen, NAD(P)H as one donor, and incorporation of one atom of oxygen [GO:0016709];oxidoreductase activity, acting on paired donors, with incorporatio…	14	4	510	55.8	8.09
3.12892	0.000743155	0.818861	I1L8Q0	Lambda class glutathione S-transferase	other metabolic processes;protein metabolism	protein glutathionylation [GO:0010731]	protein metabolism			NA	other molecular function	transferase activity [GO:0016740]	transferase activity [GO:0016740]	protein glutathionylation [GO:0010731];transferase activity [GO:0016740]	68	13	237	27.1	5.52
1.86621	0.0136078	0.817478	A0A0R4J3Q7	SHSP domain-containing protein	cell organization and biogenesis;other biological processes;stress response	protein complex oligomerization [GO:0051259];protein folding [GO:0006457];response to heat [GO:0009408];response to hydrogen peroxide [GO:0042542];response to reactive oxygen species [GO:0000302];response to salt stress [GO:0009651]	cell organization and biogenesis		cytoplasm [GO:0005737]	cytoplasm [GO:0005737]	other molecular function	protein self-association [GO:0043621];unfolded protein binding [GO:0051082]	protein self-association	cytoplasm [GO:0005737];protein complex oligomerization [GO:0051259];protein folding [GO:0006457];protein self-association [GO:0043621];response to heat [GO:0009408];response to hydrogen peroxide [GO:0042542];response to reactive oxygen species [GO:0000302];response to salt stress [GO:0009651];unfolded protein binding [GO:0051082]	28	3	161	18.5	6.37
1.41207	0.0387196	0.797045	I1LJ93	DNA helicase	cell cycle OR cell proliferation;cell organization and biogenesis;DNA metabolism;other metabolic processes;stress response	DNA strand elongation involved in DNA replication [GO:0006271];DNA unwinding involved in DNA replication [GO:0006268];double-strand break repair via break-induced replication [GO:0000727];mitotic DNA replication initiation [GO:1902975];pre-replicative complex assembly involved in nuclear cell cycle DNA replication [GO:0006267]	cell organization and biogenesis	nucleus;other cell component	MCM complex [GO:0042555];nucleus [GO:0005634]	nucleus	nucleic acid binding activity;other molecular function	ATP binding [GO:0005524];DNA helicase activity [GO:0003678];DNA replication origin binding [GO:0003688];single-stranded DNA binding [GO:0003697]	ATP binding	ATP binding [GO:0005524];DNA helicase activity [GO:0003678];DNA replication origin binding [GO:0003688];DNA strand elongation involved in DNA replication [GO:0006271];DNA unwinding involved in DNA replication [GO:0006268];double-strand break repair via break-induced replication [GO:0000727];MCM complex [GO:0042555];mitotic DNA replication initiation [GO:1902975];nucleus [GO:0005634];pre-replicati…	9	7	835	92.8	6.16
2.41435	0.0038517	0.793696	I1JPH6	Lambda class glutathione S-transferase	other metabolic processes;protein metabolism	protein glutathionylation [GO:0010731]	protein metabolism			NA	other molecular function	transferase activity [GO:0016740]	transferase activity [GO:0016740]	protein glutathionylation [GO:0010731];transferase activity [GO:0016740]	51	9	235	26.8	6.01
2.00643	0.00985314	0.778839	A0A0R4J455	Uricase	other metabolic processes	purine nucleobase metabolic process [GO:0006144];urate catabolic process [GO:0019628]	NA	other cytoplasmic organelle	peroxisome [GO:0005777]	peroxisome [GO:0005777]	other molecular function	urate oxidase activity [GO:0004846]	urate oxidase activity [GO:0004846]	peroxisome [GO:0005777];purine nucleobase metabolic process [GO:0006144];urate catabolic process [GO:0019628];urate oxidase activity [GO:0004846]	46	10	309	35.1	8.29
2.89584	0.00127105	0.766274	Q9XET0	Seed maturation protein PM30			NA			NA			NA		38	5	140	15.1	8.9
2.29508	0.00506894	0.762422	I1KTW3	Succinate-semialdehyde dehydrogenase	other metabolic processes	gamma-aminobutyric acid catabolic process [GO:0009450]	gamma-aminobutyric acid catabolic process [GO:0009450]	mitochondrion	mitochondrion [GO:0005739]	mitochondrion	other molecular function	succinate-semialdehyde dehydrogenase (NAD+) activity [GO:0004777];succinate-semialdehyde dehydrogenase [NAD(P)+] activity [GO:0009013]	succinate-semialdehyde dehydrogenase (NAD+) activity	gamma-aminobutyric acid catabolic process [GO:0009450];mitochondrion [GO:0005739];succinate-semialdehyde dehydrogenase (NAD+) activity [GO:0004777];succinate-semialdehyde dehydrogenase [NAD(P)+] activity [GO:0009013]	26	10	537	57.6	7.59
2.79025	0.00162086	0.755206	I1MR83	DUF3700 domain-containing protein			NA			NA			NA		47	7	236	25.5	5.6
2.04197	0.0090789	0.752709	I1M1V8	Pyruvate decarboxylase			NA	cytosol	cytosol [GO:0005829]	cytosol [GO:0005829]	other molecular function	carboxy-lyase activity [GO:0016831];magnesium ion binding [GO:0000287];thiamine pyrophosphate binding [GO:0030976]	carboxy-lyase activity	carboxy-lyase activity [GO:0016831];cytosol [GO:0005829];magnesium ion binding [GO:0000287];thiamine pyrophosphate binding [GO:0030976]	52	16	589	63.4	6.11
1.75055	0.0177605	0.750989	I1L6I6	Cysteine synthase	other metabolic processes	cyanide metabolic process [GO:0019499];cysteine biosynthetic process from serine [GO:0006535]	amino acid metabolism	mitochondrion;other cell component	cytoplasm [GO:0005737];mitochondrion [GO:0005739]	mitochondrion	other molecular function	cysteine synthase activity [GO:0004124];L-3-cyanoalanine synthase activity [GO:0050017];pyridoxal phosphate binding [GO:0030170]	cysteine synthase activity	cyanide metabolic process [GO:0019499];cysteine biosynthetic process from serine [GO:0006535];cysteine synthase activity [GO:0004124];cytoplasm [GO:0005737];L-3-cyanoalanine synthase activity [GO:0050017];mitochondrion [GO:0005739];pyridoxal phosphate binding [GO:0030170]	29	9	373	40.1	7.56
1.32997	0.0467771	0.747917	I1LGK4	AT-hook motif nuclear-localized protein	developmental processes;other biological processes	vegetative to reproductive phase transition of meristem [GO:0010228]	developmental processes	nucleus	nucleus [GO:0005634]	nucleus [GO:0005634]	nucleic acid binding activity;other molecular function	AT DNA binding [GO:0003680];DNA-binding transcription factor activity [GO:0003700]	DNA-binding transcription factor activity	AT DNA binding [GO:0003680];DNA-binding transcription factor activity [GO:0003700];nucleus [GO:0005634];vegetative to reproductive phase transition of meristem [GO:0010228]	8	2	298	31	6.84
2.24188	0.00572952	0.744407	I1MRM5	Bet_v_1 domain-containing protein	other biological processes;signal transduction;stress response	abscisic acid-activated signaling pathway [GO:0009738];defense response [GO:0006952];regulation of protein serine/threonine phosphatase activity [GO:0080163];response to biotic stimulus [GO:0009607]	stress response	nucleus;other cell component	cytoplasm [GO:0005737];nucleus [GO:0005634]	nucleus	enzyme regulator activity;other molecular function	abscisic acid binding [GO:0010427];protein phosphatase inhibitor activity [GO:0004864];signaling receptor activity [GO:0038023]	abscisic acid binding	abscisic acid binding [GO:0010427];abscisic acid-activated signaling pathway [GO:0009738];cytoplasm [GO:0005737];defense response [GO:0006952];nucleus [GO:0005634];protein phosphatase inhibitor activity [GO:0004864];regulation of protein serine/threonine phosphatase activity [GO:0080163];response to biotic stimulus [GO:0009607];signaling receptor activity [GO:0038023]	78	9	157	17.1	5.07
2.61515	0.00242579	0.740249	A0A0R0KF48	Pyruvate decarboxylase			NA	cytosol		cytosol	other molecular function	carboxy-lyase activity [GO:0016831];magnesium ion binding [GO:0000287];thiamine pyrophosphate binding [GO:0030976]	magnesium ion binding	carboxy-lyase activity [GO:0016831];magnesium ion binding [GO:0000287];thiamine pyrophosphate binding [GO:0030976]	32	10	603	65.2	6.21
1.70457	0.0197435	0.719245	A0A0R0KKR3	Aldo_ket_red domain-containing protein			NA	cytosol		cytosol	other molecular function	oxidoreductase activity [GO:0016491]	oxidoreductase activity [GO:0016491]	oxidoreductase activity [GO:0016491]	62	16	313	35.2	6.46
2.49924	0.00316783	0.7151	C6T4X0	Usp domain-containing protein			NA			NA			NA		25	4	182	20	6.55
1.66797	0.0214797	0.706418	I1L957	Uncharacterized protein			NA			NA			NA		31	9	449	48.8	6.42
1.7217	0.0189803	0.700355	C6T3L8	WD_REPEATS_REGION domain-containing protein (Fragment)			NA			NA			NA		17	2	198	22.2	7.84
2.5438	0.0028589	0.693089	K7LKJ0	HMA domain-containing protein		metal ion transport [GO:0030001]	metal ion transport [GO:0030001]			NA	other molecular function	metal ion binding [GO:0046872]	metal ion binding [GO:0046872]	metal ion binding [GO:0046872];metal ion transport [GO:0030001]	48	3	81	8.6	6.6
1.72771	0.0187192	0.690478	I1K328	DNA helicase	cell cycle OR cell proliferation;cell organization and biogenesis;DNA metabolism;other metabolic processes;stress response	DNA strand elongation involved in DNA replication [GO:0006271];double-strand break repair via break-induced replication [GO:0000727];mitotic DNA replication initiation [GO:1902975];pre-replicative complex assembly involved in nuclear cell cycle DNA replication [GO:0006267]	cell organization and biogenesis	nucleus;other cell component	MCM complex [GO:0042555];nucleus [GO:0005634]	nucleus	nucleic acid binding activity;other molecular function	ATP binding [GO:0005524];DNA helicase activity [GO:0003678];DNA replication origin binding [GO:0003688];single-stranded DNA binding [GO:0003697]	ATP binding	ATP binding [GO:0005524];DNA helicase activity [GO:0003678];DNA replication origin binding [GO:0003688];DNA strand elongation involved in DNA replication [GO:0006271];double-strand break repair via break-induced replication [GO:0000727];MCM complex [GO:0042555];mitotic DNA replication initiation [GO:1902975];nucleus [GO:0005634];pre-replicative complex assembly involved in nuclear cell cycle DNA …	5	3	782	86.7	6.68
1.61523	0.0242532	0.689856	C6T374	VOC domain-containing protein			NA			NA			NA		37	2	139	15.4	5.69
2.97439	0.00106075	0.681163	I1J7G5	Uncharacterized protein			NA			NA			NA		54	8	170	18.6	5.02
1.98541	0.0103416	0.67885	I1LZ19	Importin subunit alpha	transport	NLS-bearing protein import into nucleus [GO:0006607]	transport	nucleus;other cell component	cytosol [GO:0005829];nuclear pore [GO:0005643];nucleoplasm [GO:0005654]	nucleus	other molecular function	nuclear import signal receptor activity [GO:0061608];nuclear localization sequence binding [GO:0008139]	nuclear import signal receptor activity	cytosol [GO:0005829];NLS-bearing protein import into nucleus [GO:0006607];nuclear import signal receptor activity [GO:0061608];nuclear localization sequence binding [GO:0008139];nuclear pore [GO:0005643];nucleoplasm [GO:0005654]	11	4	517	55.8	5.52
1.75277	0.0176697	0.678491	I1LXJ6	Uncharacterized protein	transport		transport			NA	other molecular function;transporter activity	ATP binding [GO:0005524];ATPase activity [GO:0016887]	ATP binding	ATP binding [GO:0005524];ATPase activity [GO:0016887]	23	9	712	79.3	6.51
1.76817	0.0170541	0.670022	C6TBF6	Usp domain-containing protein			NA			NA			NA		20	3	177	19.5	7.27
1.33754	0.0459686	0.669205	A0A0R0JE00	Uncharacterized protein	other metabolic processes		other metabolic processes	other cell component		other cell component	other molecular function		other molecular function		30	5	229	26.6	6.02
1.52977	0.0295277	0.665352	I1LEE9	RING-type domain-containing protein			NA	other membranes		other membranes	other molecular function		other molecular function		27	4	253	27.8	7.17
2.93351	0.00116544	0.662401	I1KDR0	Uncharacterized protein	cell organization and biogenesis	proteasome assembly [GO:0043248]	cell organization and biogenesis		proteasome regulatory particle, base subcomplex [GO:0008540]	proteasome regulatory particle, base subcomplex [GO:0008540]			NA	proteasome assembly [GO:0043248];proteasome regulatory particle, base subcomplex [GO:0008540]	50	13	525	57.1	5.39
2.8988	0.00126241	0.6586	I1MGG5	Uncharacterized protein			NA			NA			NA		54	5	135	14.6	7.14
3.6322	0.00023324	0.652713	I1N5H9	Polyribonucleotide nucleotidyltransferase	other metabolic processes;RNA metabolism OR transcription	mitochondrial mRNA catabolic process [GO:0000958];mitochondrial RNA 3'-end processing [GO:0000965];mitochondrial RNA catabolic process [GO:0000957];mitochondrial RNA processing [GO:0000963];RNA catabolic process [GO:0006401]	RNA metabolism OR transcription	cytosol;mitochondrion	chloroplast [GO:0009507];chloroplast stroma [GO:0009570];cytosol [GO:0005829];mitochondrion [GO:0005739]	cytosol	nucleic acid binding activity;other molecular function	3'-5'-exoribonuclease activity [GO:0000175];polyribonucleotide nucleotidyltransferase activity [GO:0004654];RNA binding [GO:0003723]	RNA binding	3'-5'-exoribonuclease activity [GO:0000175];chloroplast [GO:0009507];chloroplast stroma [GO:0009570];cytosol [GO:0005829];mitochondrial mRNA catabolic process [GO:0000958];mitochondrial RNA 3'-end processing [GO:0000965];mitochondrial RNA catabolic process [GO:0000957];mitochondrial RNA processing [GO:0000963];mitochondrion [GO:0005739];polyribonucleotide nucleotidyltransferase activity [GO:00046…	4	3	959	104.9	6.81
3.01899	0.000957214	0.651844	A0A0R0J475	Uncharacterized protein			NA			NA			NA		17	8	704	79.2	7.69
1.37537	0.0421337	0.651685	C6TME1	Uncharacterized protein			NA	ER/Golgi;other membranes	endoplasmic reticulum [GO:0005783];integral component of membrane [GO:0016021]	endoplasmic reticulum	other molecular function	ketoreductase activity [GO:0045703]	ketoreductase activity [GO:0045703]	endoplasmic reticulum [GO:0005783];integral component of membrane [GO:0016021];ketoreductase activity [GO:0045703]	32	9	320	35.8	9.58
1.73666	0.0183373	0.650922	I1KK68	Uncharacterized protein	other metabolic processes	glutathione metabolic process [GO:0006749]	glutathione metabolic process [GO:0006749]	other cell component	cytoplasm [GO:0005737]	cytoplasm [GO:0005737]	other molecular function	glutathione transferase activity [GO:0004364]	glutathione transferase activity [GO:0004364]	cytoplasm [GO:0005737];glutathione metabolic process [GO:0006749];glutathione transferase activity [GO:0004364]	32	6	225	25.9	6.15
1.82784	0.0148647	0.641116	K7LXH3	Uncharacterized protein	transport		transport	other membranes	integral component of membrane [GO:0016021]	integral component of membrane [GO:0016021]	other molecular function;transporter activity	ATP binding [GO:0005524];ATPase activity [GO:0016887];ATPase-coupled transmembrane transporter activity [GO:0042626]	ATP binding	ATP binding [GO:0005524];ATPase activity [GO:0016887];ATPase-coupled transmembrane transporter activity [GO:0042626];integral component of membrane [GO:0016021]	15	10	1091	118.3	8.59
2.7541	0.00176156	0.64092	I1KGC4	Beta-galactosidase	other metabolic processes	carbohydrate metabolic process [GO:0005975]	carbohydrate metabolic process [GO:0005975]	non-structural extracellular;other cell component;other cytoplasmic organelle	cell wall [GO:0005618];vacuole [GO:0005773]	cell wall	other molecular function	beta-galactosidase activity [GO:0004565];carbohydrate binding [GO:0030246]	beta-galactosidase activity	beta-galactosidase activity [GO:0004565];carbohydrate binding [GO:0030246];carbohydrate metabolic process [GO:0005975];cell wall [GO:0005618];vacuole [GO:0005773]	11	5	845	93.5	8.38
2.61117	0.00244809	0.635471	A0A0R0L177	CASP-like protein			NA	other membranes;plasma membrane	integral component of membrane [GO:0016021];plasma membrane [GO:0005886]	plasma membrane			NA	integral component of membrane [GO:0016021];plasma membrane [GO:0005886]	25	4	169	18.2	5.15
2.04711	0.00897194	0.635216	A0A0R0JL19	Uncharacterized protein	other metabolic processes	formaldehyde catabolic process [GO:0046294]	formaldehyde catabolic process [GO:0046294]	cytosol	cytosol [GO:0005829]	cytosol [GO:0005829]	other molecular function	alcohol dehydrogenase activity, zinc-dependent [GO:0004024];S-(hydroxymethyl)glutathione dehydrogenase activity [GO:0051903];zinc ion binding [GO:0008270]	alcohol dehydrogenase activity	alcohol dehydrogenase activity, zinc-dependent [GO:0004024];cytosol [GO:0005829];formaldehyde catabolic process [GO:0046294];S-(hydroxymethyl)glutathione dehydrogenase activity [GO:0051903];zinc ion binding [GO:0008270]	66	21	381	41	6.4
1.5657	0.0271833	0.630213	C6SVS2	AAI domain-containing protein			NA	other membranes;plasma membrane		other membranes;plasma membrane			NA		15	2	182	19.2	7.9
1.58865	0.0257842	0.62497	A0A0R0H1Q3	S-acyltransferase	other metabolic processes;protein metabolism		protein metabolism	ER/Golgi;other membranes	integral component of membrane [GO:0016021]	ER/Golgi	other molecular function	protein-cysteine S-palmitoyltransferase activity [GO:0019706]	protein-cysteine S-palmitoyltransferase activity [GO:0019706]	integral component of membrane [GO:0016021];protein-cysteine S-palmitoyltransferase activity [GO:0019706]	5	2	632	69	6.9
2.65366	0.00221994	0.622602	A0A0R0HSY5	Uncharacterized protein	other biological processes;other metabolic processes;protein metabolism;signal transduction	detection of visible light [GO:0009584];protein-chromophore linkage [GO:0018298];protein-tetrapyrrole linkage [GO:0017006];red, far-red light phototransduction [GO:0009585];regulation of transcription, DNA-templated [GO:0006355]	signal transduction	nucleus;other membranes	integral component of membrane [GO:0016021]	nucleus	kinase activity;other molecular function	phosphorelay sensor kinase activity [GO:0000155];photoreceptor activity [GO:0009881];protein homodimerization activity [GO:0042803]	phosphorelay sensor kinase activity	detection of visible light [GO:0009584];integral component of membrane [GO:0016021];phosphorelay sensor kinase activity [GO:0000155];photoreceptor activity [GO:0009881];protein homodimerization activity [GO:0042803];protein-chromophore linkage [GO:0018298];protein-tetrapyrrole linkage [GO:0017006];red, far-red light phototransduction [GO:0009585];regulation of transcription, DNA-templated [GO:000…	15	11	1191	132.1	6.87
2.30745	0.00492658	0.614877	C6SWV3	Uncharacterized protein			NA			NA			NA		43	7	245	27.6	6.1
1.40393	0.0394519	0.614726	K7LJS8	AIR carboxylase	other metabolic processes	'de novo' IMP biosynthetic process [GO:0006189]	de novo' IMP biosynthetic process [GO:0006189]	other cell component	chloroplast [GO:0009507]	chloroplast [GO:0009507]	other molecular function	ATP binding [GO:0005524];metal ion binding [GO:0046872];phosphoribosylaminoimidazole carboxylase activity [GO:0004638]	ATP binding	ATP binding [GO:0005524];chloroplast [GO:0009507];'de novo' IMP biosynthetic process [GO:0006189];metal ion binding [GO:0046872];phosphoribosylaminoimidazole carboxylase activity [GO:0004638]	17	6	633	68.8	6.57
1.36358	0.0432937	0.611545	C6SV68	Cysteine proteinase inhibitor	other biological processes		other biological processes			NA	enzyme regulator activity	cysteine-type endopeptidase inhibitor activity [GO:0004869]	enzyme regulator activity	cysteine-type endopeptidase inhibitor activity [GO:0004869]	32	3	103	11.4	6.06
2.72742	0.00187317	0.611517	A0A0R0I4F6	Uncharacterized protein			NA			NA	other molecular function	oxidoreductase activity [GO:0016491]	oxidoreductase activity [GO:0016491]	oxidoreductase activity [GO:0016491]	44	11	293	31.8	7.36
1.46636	0.0341697	0.610049	I1JJV5	Protein kinase domain-containing protein	other metabolic processes;protein metabolism;signal transduction	brassinosteroid mediated signaling pathway [GO:0009742]	protein metabolism			NA	kinase activity;other molecular function	ATP binding [GO:0005524];protein kinase activity [GO:0004672]	ATP binding	ATP binding [GO:0005524];brassinosteroid mediated signaling pathway [GO:0009742];protein kinase activity [GO:0004672]	34	11	509	57.9	6.18
1.35986	0.0436653	0.609944	A0A0R0ERN7	Peptidase_S9 domain-containing protein	protein metabolism		protein metabolism			NA	other molecular function	serine-type peptidase activity [GO:0008236]	serine-type peptidase activity [GO:0008236]	serine-type peptidase activity [GO:0008236]	11	6	964	107	6.4
1.57085	0.0268625	0.606971	I1KZW8	PAP_fibrillin domain-containing protein			NA			NA			NA		33	7	312	33.6	5.31
1.95882	0.0109947	0.604271	A0A0R0FS66	Uncharacterized protein			NA	other membranes	integral component of membrane [GO:0016021]	integral component of membrane [GO:0016021]			NA	integral component of membrane [GO:0016021]	11	6	975	106.7	4.79
2.33204	0.00465542	0.597006	I1M4L1	Uncharacterized protein	other metabolic processes	isopentenyl diphosphate biosynthetic process, methylerythritol 4-phosphate pathway [GO:0019288];terpenoid biosynthetic process [GO:0016114]	NA	other cell component	chloroplast [GO:0009507]	chloroplast [GO:0009507]	other molecular function	4-hydroxy-3-methylbut-2-en-1-yl diphosphate synthase activity [GO:0046429];iron ion binding [GO:0005506]	iron ion binding	4-hydroxy-3-methylbut-2-en-1-yl diphosphate synthase activity [GO:0046429];chloroplast [GO:0009507];iron ion binding [GO:0005506];isopentenyl diphosphate biosynthetic process, methylerythritol 4-phosphate pathway [GO:0019288];terpenoid biosynthetic process [GO:0016114]	21	12	742	82.4	6.39
2.63054	0.00234131	0.594655	C6TJ74	Uncharacterized protein			NA			NA			NA		9	3	406	45.1	6.62
2.13496	0.00732899	0.591982	C6TIE2	AB hydrolase-1 domain-containing protein			NA			NA	other molecular function	catalytic activity [GO:0003824]	catalytic activity [GO:0003824]	catalytic activity [GO:0003824]	34	8	314	35.3	5.3
2.13178	0.00738273	0.591294	I1KXG9	Aldedh domain-containing protein			NA			NA	other molecular function	aldehyde dehydrogenase (NAD) activity [GO:0004029]	aldehyde dehydrogenase (NAD) activity [GO:0004029]	aldehyde dehydrogenase (NAD) activity [GO:0004029]	54	18	536	58.4	7.55
2.99406	0.00101378	0.585828	I1KRJ7	Peroxiredoxin	other biological processes	cell redox homeostasis [GO:0045454];cellular response to oxidative stress [GO:0034599];hydrogen peroxide catabolic process [GO:0042744]	cell redox homeostasis	cytosol;mitochondrion	cytosol [GO:0005829]	cytosol	other molecular function	peroxidase activity [GO:0004601];peroxiredoxin activity [GO:0051920]	peroxidase activity	cell redox homeostasis [GO:0045454];cellular response to oxidative stress [GO:0034599];cytosol [GO:0005829];hydrogen peroxide catabolic process [GO:0042744];peroxidase activity [GO:0004601];peroxiredoxin activity [GO:0051920]	66	9	218	24.4	6.92
2.36126	0.00435249	-0.588592	I1JBS3	Uncharacterized protein			NA			NA			NA		35	10	445	48.6	5.29
1.3084	0.0491588	-0.589872	K7MLE0	Uncharacterized protein	other biological processes	regulation of gene expression [GO:0010468]	regulation of gene expression [GO:0010468]	other cytoplasmic organelle	peroxisome [GO:0005777]	peroxisome [GO:0005777]			NA	peroxisome [GO:0005777];regulation of gene expression [GO:0010468]	3	2	1124	124.7	6.04
2.24735	0.00565789	-0.598429	I1MXV5	GYF domain-containing protein			NA			NA			NA		3	3	1783	195.2	6.4
3.01758	0.00096034	-0.600444	A0A0R0J895	Terpene cyclase/mutase family member	other metabolic processes	triterpenoid biosynthetic process [GO:0016104]	triterpenoid biosynthetic process [GO:0016104]	other cell component	lipid droplet [GO:0005811]	lipid droplet [GO:0005811]	other molecular function	beta-amyrin synthase activity [GO:0042300];lanosterol synthase activity [GO:0000250]	beta-amyrin synthase activity	beta-amyrin synthase activity [GO:0042300];lanosterol synthase activity [GO:0000250];lipid droplet [GO:0005811];triterpenoid biosynthetic process [GO:0016104]	13	7	762	87.5	6.76
2.04627	0.0089893	-0.600567	I1L546	NmrA domain-containing protein			NA			NA	other molecular function		other molecular function		10	2	318	35.6	6.62
2.72943	0.00186455	-0.618892	I1JXR7	Exostosin domain-containing protein	other biological processes;other metabolic processes;protein metabolism	glucuronoxylan biosynthetic process [GO:0010417];plant-type secondary cell wall biogenesis [GO:0009834];protein glycosylation [GO:0006486]	protein glycosylation	ER/Golgi;other membranes	Golgi apparatus [GO:0005794]	Golgi apparatus [GO:0005794]	other molecular function	1,4-beta-D-xylan synthase activity [GO:0047517];glucuronoxylan glucuronosyltransferase activity [GO:0080116];transferase activity, transferring glycosyl groups [GO:0016757]	glucuronoxylan glucuronosyltransferase activity	1,4-beta-D-xylan synthase activity [GO:0047517];glucuronoxylan biosynthetic process [GO:0010417];glucuronoxylan glucuronosyltransferase activity [GO:0080116];Golgi apparatus [GO:0005794];plant-type secondary cell wall biogenesis [GO:0009834];protein glycosylation [GO:0006486];transferase activity, transferring glycosyl groups [GO:0016757]	8	2	416	47.1	6.65
3.26959	0.000537541	-0.619758	I1KFY7	UDP glucuronic acid:soyasapogenol glucuronosyltransferase	cell cycle OR cell proliferation;other metabolic processes	cell wall organization [GO:0071555];cellulose biosynthetic process [GO:0030244];plant-type primary cell wall biogenesis [GO:0009833]	cell wall organization	ER/Golgi;other membranes;plasma membrane	Golgi apparatus [GO:0005794];integral component of membrane [GO:0016021];plasma membrane [GO:0005886];trans-Golgi network [GO:0005802]	Golgi apparatus	other molecular function	cellulose synthase (UDP-forming) activity [GO:0016760];cellulose synthase activity [GO:0016759]	cellulose synthase activity	cell wall organization [GO:0071555];cellulose biosynthetic process [GO:0030244];cellulose synthase (UDP-forming) activity [GO:0016760];cellulose synthase activity [GO:0016759];Golgi apparatus [GO:0005794];integral component of membrane [GO:0016021];plant-type primary cell wall biogenesis [GO:0009833];plasma membrane [GO:0005886];trans-Golgi network [GO:0005802]	29	17	699	79.5	8.57
2.07014	0.00850855	-0.620291	C6SYE7	Bet_v_1 domain-containing protein	stress response	defense response [GO:0006952]	stress response			NA			NA	defense response [GO:0006952]	55	6	152	17.6	6.52
2.77474	0.0016798	-0.623829	I1L0Z7	Uncharacterized protein	transport	transmembrane transport [GO:0055085]	transport	other cytoplasmic organelle;other membranes	integral component of membrane [GO:0016021];membrane [GO:0016020];plant-type vacuole [GO:0000325];vacuolar membrane [GO:0005774]	vacuolar membrane	other molecular function;transporter activity	ATP binding [GO:0005524];ATPase activity [GO:0016887];ATPase-coupled transmembrane transporter activity [GO:0042626]	ATP binding	ATP binding [GO:0005524];ATPase activity [GO:0016887];ATPase-coupled transmembrane transporter activity [GO:0042626];integral component of membrane [GO:0016021];membrane [GO:0016020];plant-type vacuole [GO:0000325];transmembrane transport [GO:0055085];vacuolar membrane [GO:0005774]	12	11	1506	168.3	7.47
1.76728	0.0170891	-0.624454	K7KA83	E1 ubiquitin-activating enzyme	other metabolic processes;protein metabolism;stress response	cellular response to DNA damage stimulus [GO:0006974];protein modification by small protein conjugation [GO:0032446];protein ubiquitination [GO:0016567]	stress response	nucleus;other cell component	cytoplasm [GO:0005737];nucleus [GO:0005634]	nucleus	other molecular function	ATP binding [GO:0005524];ubiquitin activating enzyme activity [GO:0004839]	ATP binding	ATP binding [GO:0005524];cellular response to DNA damage stimulus [GO:0006974];cytoplasm [GO:0005737];nucleus [GO:0005634];protein modification by small protein conjugation [GO:0032446];protein ubiquitination [GO:0016567];ubiquitin activating enzyme activity [GO:0004839]	28	22	1092	120.5	5.25
2.56057	0.0027506	-0.624877	A0A0R0FI80	Cellulose synthase	cell cycle OR cell proliferation;cell organization and biogenesis;other metabolic processes	cell wall organization [GO:0071555];cellulose biosynthetic process [GO:0030244]	cell wall organization	ER/Golgi;other membranes;plasma membrane	integral component of membrane [GO:0016021];plasma membrane [GO:0005886]	plasma membrane	other molecular function	cellulose synthase (UDP-forming) activity [GO:0016760];metal ion binding [GO:0046872]	metal ion binding	cell wall organization [GO:0071555];cellulose biosynthetic process [GO:0030244];cellulose synthase (UDP-forming) activity [GO:0016760];integral component of membrane [GO:0016021];metal ion binding [GO:0046872];plasma membrane [GO:0005886]	8	5	1034	116.5	6.7
1.52216	0.0300499	-0.625145	A0A368UGT8	Uncharacterized protein	other metabolic processes		other metabolic processes	other membranes		other membranes	other molecular function	hydrolase activity [GO:0016787]	hydrolase activity [GO:0016787]	hydrolase activity [GO:0016787]	28	8	463	50.4	5.14
3.02901	0.000935395	-0.630563	K7MPG5	Uncharacterized protein			NA			NA	other molecular function	pyridoxal phosphate binding [GO:0030170];transaminase activity [GO:0008483]	transaminase activity	pyridoxal phosphate binding [GO:0030170];transaminase activity [GO:0008483]	28	6	389	42.4	8.29
2.77812	0.00166679	-0.633395	I1KJR9	Uncharacterized protein	other metabolic processes;protein metabolism	glutathione catabolic process [GO:0006751]	protein metabolism	other membranes;plasma membrane	integral component of membrane [GO:0016021];plasma membrane [GO:0005886]	plasma membrane	other molecular function	glutathione hydrolase activity [GO:0036374];peptidyltransferase activity [GO:0000048]	glutathione hydrolase activity	glutathione catabolic process [GO:0006751];glutathione hydrolase activity [GO:0036374];integral component of membrane [GO:0016021];peptidyltransferase activity [GO:0000048];plasma membrane [GO:0005886]	14	5	618	66.1	6.71
1.5597	0.0275612	-0.638586	A0A0R0EYA9	Uncharacterized protein	DNA metabolism;other metabolic processes	DNA replication [GO:0006260]	DNA metabolism	nucleus;other cell component		nucleus	nucleic acid binding activity	DNA binding [GO:0003677];DNA-directed DNA polymerase activity [GO:0003887]	DNA binding	DNA binding [GO:0003677];DNA replication [GO:0006260];DNA-directed DNA polymerase activity [GO:0003887]	11	2	444	49.8	5.88
1.62309	0.0238181	-0.6491	A0A0R0GN50	Phosphotransferase	other biological processes;other metabolic processes	cellular glucose homeostasis [GO:0001678];glycolytic process [GO:0006096]	glycolytic process	cytosol;mitochondrion	cell [GO:0005623]	cytosol	kinase activity;other molecular function	ATP binding [GO:0005524];glucose binding [GO:0005536];hexokinase activity [GO:0004396]	ATP binding	ATP binding [GO:0005524];cell [GO:0005623];cellular glucose homeostasis [GO:0001678];glucose binding [GO:0005536];glycolytic process [GO:0006096];hexokinase activity [GO:0004396]	20	6	501	53.7	5.24
1.92154	0.0119801	-0.649774	I1L071	Hexosyltransferase	cell organization and biogenesis;other metabolic processes	cell wall organization [GO:0071555];pectin biosynthetic process [GO:0045489]	cell wall organization	ER/Golgi;other membranes	Golgi membrane [GO:0000139]	Golgi membrane [GO:0000139]	other molecular function	polygalacturonate 4-alpha-galacturonosyltransferase activity [GO:0047262]	polygalacturonate 4-alpha-galacturonosyltransferase activity [GO:0047262]	cell wall organization [GO:0071555];Golgi membrane [GO:0000139];pectin biosynthetic process [GO:0045489];polygalacturonate 4-alpha-galacturonosyltransferase activity [GO:0047262]	4	2	657	75.3	7.68
1.57332	0.0267105	-0.651041	I1KSC1	Uncharacterized protein			NA	ER/Golgi;other membranes	Golgi apparatus [GO:0005794];integral component of membrane [GO:0016021]	Golgi apparatus			NA	Golgi apparatus [GO:0005794];integral component of membrane [GO:0016021]	6	3	575	66.5	8.19
1.36698	0.0429556	-0.659886	I1MS87	Uncharacterized protein			NA			NA	nucleic acid binding activity	RNA binding [GO:0003723]	RNA binding [GO:0003723]	RNA binding [GO:0003723]	17	4	410	44.7	7.81
2.10317	0.00788549	-0.66016	A0A0R0I5R9	Methionine gamma lyase 1	other metabolic processes	cysteine biosynthetic process via cystathionine [GO:0019343];transsulfuration [GO:0019346]	amino acid metabolism	other cell component	cytoplasm [GO:0005737]	cytoplasm [GO:0005737]	other molecular function	carbon-sulfur lyase activity [GO:0016846];cystathionine gamma-lyase activity [GO:0004123];pyridoxal phosphate binding [GO:0030170]	carbon-sulfur lyase activity	carbon-sulfur lyase activity [GO:0016846];cystathionine gamma-lyase activity [GO:0004123];cysteine biosynthetic process via cystathionine [GO:0019343];cytoplasm [GO:0005737];pyridoxal phosphate binding [GO:0030170];transsulfuration [GO:0019346]	27	10	442	48	6.52
3.19956	0.000631592	-0.662868	I1MIG3	Glycosyltransferase			NA		intracellular membrane-bounded organelle [GO:0043231]	intracellular membrane-bounded organelle [GO:0043231]	other molecular function	quercetin 3-O-glucosyltransferase activity [GO:0080043];quercetin 7-O-glucosyltransferase activity [GO:0080044];UDP-glycosyltransferase activity [GO:0008194]	quercetin 3-O-glucosyltransferase activity	intracellular membrane-bounded organelle [GO:0043231];quercetin 3-O-glucosyltransferase activity [GO:0080043];quercetin 7-O-glucosyltransferase activity [GO:0080044];UDP-glycosyltransferase activity [GO:0008194]	26	8	501	56.4	5.92
2.5259	0.00297923	-0.669916	I1L905	Phenylalanine ammonia-lyase	other metabolic processes	cinnamic acid biosynthetic process [GO:0009800];L-phenylalanine catabolic process [GO:0006559]	amino acid metabolism	other cell component	cytoplasm [GO:0005737]	cytoplasm [GO:0005737]	other molecular function	phenylalanine ammonia-lyase activity [GO:0045548]	phenylalanine ammonia-lyase activity [GO:0045548]	cinnamic acid biosynthetic process [GO:0009800];cytoplasm [GO:0005737];L-phenylalanine catabolic process [GO:0006559];phenylalanine ammonia-lyase activity [GO:0045548]	44	24	717	78.1	6.19
1.66627	0.021564	-0.681371	K7N525	AIR carboxylase	other metabolic processes	'de novo' IMP biosynthetic process [GO:0006189]	'de novo' IMP biosynthetic process [GO:0006189]	other cell component	chloroplast [GO:0009507]	chloroplast [GO:0009507]	other molecular function	ATP binding [GO:0005524];metal ion binding [GO:0046872];phosphoribosylaminoimidazole carboxylase activity [GO:0004638]	ATP binding	ATP binding [GO:0005524];chloroplast [GO:0009507];'de novo' IMP biosynthetic process [GO:0006189];metal ion binding [GO:0046872];phosphoribosylaminoimidazole carboxylase activity [GO:0004638]	15	5	633	68.6	6.83
2.6104	0.00245243	-0.683778	Q43440	Lipoxygenase	other metabolic processes	oxylipin biosynthetic process [GO:0031408]	oxylipin biosynthetic process [GO:0031408]	other cell component		other cell component	other molecular function	metal ion binding [GO:0046872];oxidoreductase activity, acting on single donors with incorporation of molecular oxygen, incorporation of two atoms of oxygen [GO:0016702]	metal ion binding	metal ion binding [GO:0046872];oxidoreductase activity, acting on single donors with incorporation of molecular oxygen, incorporation of two atoms of oxygen [GO:0016702];oxylipin biosynthetic process [GO:0031408]	53	33	859	96.2	6.77
3.28324	0.00052091	-0.697202	I1NDI0	Uncharacterized protein			NA	cytosol;other cell component	cytosol [GO:0005829];ribonucleoprotein complex [GO:1990904]	cytosol	nucleic acid binding activity	mRNA binding [GO:0003729]	mRNA binding [GO:0003729]	cytosol [GO:0005829];mRNA binding [GO:0003729];ribonucleoprotein complex [GO:1990904]	22	7	465	50.8	6.04
1.3533	0.0443298	-0.697666	I1KCP1	Plasma membrane ATPase	other biological processes;transport	proton export across plasma membrane [GO:0120029];proton transmembrane transport [GO:1902600];regulation of intracellular pH [GO:0051453]	transport	other membranes;plasma membrane	integral component of membrane [GO:0016021];plasma membrane [GO:0005886]	plasma membrane	other molecular function;transporter activity	ATP binding [GO:0005524];proton-exporting ATPase activity, phosphorylative mechanism [GO:0008553]	ATP binding	ATP binding [GO:0005524];integral component of membrane [GO:0016021];plasma membrane [GO:0005886];proton export across plasma membrane [GO:0120029];proton transmembrane transport [GO:1902600];proton-exporting ATPase activity, phosphorylative mechanism [GO:0008553];regulation of intracellular pH [GO:0051453]	36	26	956	105.2	6.84
2.11841	0.00761365	-0.69817	I1JJW5	Uncharacterized protein	other metabolic processes;protein metabolism;signal transduction	abscisic acid-activated signaling pathway [GO:0009738];intracellular signal transduction [GO:0035556];peptidyl-serine phosphorylation [GO:0018105];protein autophosphorylation [GO:0046777]	signal transduction	nucleus;other cell component	cytoplasm [GO:0005737];nucleus [GO:0005634]	nucleus	kinase activity;other molecular function	ATP binding [GO:0005524];calcium ion binding [GO:0005509];calcium-dependent protein serine/threonine kinase activity [GO:0009931];calmodulin binding [GO:0005516];calmodulin-dependent protein kinase activity [GO:0004683]	ATP binding	abscisic acid-activated signaling pathway [GO:0009738];ATP binding [GO:0005524];calcium ion binding [GO:0005509];calcium-dependent protein serine/threonine kinase activity [GO:0009931];calmodulin binding [GO:0005516];calmodulin-dependent protein kinase activity [GO:0004683];cytoplasm [GO:0005737];intracellular signal transduction [GO:0035556];nucleus [GO:0005634];peptidyl-serine phosphorylation […	13	4	549	61.5	5.83
1.31167	0.0487899	-0.698209	I1MCZ5	LEA_2 domain-containing protein			NA	other membranes;plasma membrane	integral component of membrane [GO:0016021];plasma membrane [GO:0005886]	plasma membrane			NA	integral component of membrane [GO:0016021];plasma membrane [GO:0005886]	12	2	254	27.9	10.27
1.91109	0.0122719	-0.698474	I1JG01	Peroxidase	other biological processes;other metabolic processes;stress response	hydrogen peroxide catabolic process [GO:0042744];response to oxidative stress [GO:0006979]	stress response	non-structural extracellular	extracellular region [GO:0005576]	non-structural extracellular	other molecular function	heme binding [GO:0020037];metal ion binding [GO:0046872];peroxidase activity [GO:0004601]	heme binding	extracellular region [GO:0005576];heme binding [GO:0020037];hydrogen peroxide catabolic process [GO:0042744];metal ion binding [GO:0046872];peroxidase activity [GO:0004601];response to oxidative stress [GO:0006979]	9	2	331	35	4.75
2.73822	0.00182719	-0.700974	I1LN10	Uncharacterized protein	other metabolic processes	aromatic compound biosynthetic process [GO:0019438]	aromatic compound biosynthetic process [GO:0019438]		cytosol [GO:0005829]	cytosol [GO:0005829]	other molecular function	O-methyltransferase activity [GO:0008171];protein dimerization activity [GO:0046983];S-adenosylmethionine-dependent methyltransferase activity [GO:0008757]	O-methyltransferase activity	aromatic compound biosynthetic process [GO:0019438];cytosol [GO:0005829];O-methyltransferase activity [GO:0008171];protein dimerization activity [GO:0046983];S-adenosylmethionine-dependent methyltransferase activity [GO:0008757]	16	4	366	40.5	5.48
1.48506	0.0327295	-0.701546	K7MKA6	5'-deoxynucleotidase	other metabolic processes		other metabolic processes	other cell component		other cell component	other molecular function	5'-deoxynucleotidase activity [GO:0002953]	5'-deoxynucleotidase activity [GO:0002953]	5'-deoxynucleotidase activity [GO:0002953]	14	2	234	25.9	8.24
3.11249	0.000771811	-0.703424	I1LRC1	Glyco_trans_2-like domain-containing protein	other metabolic processes		other metabolic processes	ER/Golgi;other membranes	Golgi apparatus [GO:0005794];integral component of membrane [GO:0016021]	Golgi apparatus	other molecular function	mannan synthase activity [GO:0051753];transferase activity, transferring glycosyl groups [GO:0016757]	transferase activity	Golgi apparatus [GO:0005794];integral component of membrane [GO:0016021];mannan synthase activity [GO:0051753];transferase activity, transferring glycosyl groups [GO:0016757]	21	8	543	62.5	9.11
1.59112	0.0256379	-0.706851	I1NCH4	BTB domain-containing protein	other biological processes	response to red light [GO:0010114]	response to red light [GO:0010114]	nucleus	nucleus [GO:0005634]	nucleus [GO:0005634]			NA	nucleus [GO:0005634];response to red light [GO:0010114]	3	2	553	62.8	5.31
2.58304	0.00261193	-0.713326	A0A0R0KK81	Methyltransferase	other metabolic processes		other metabolic processes	other membranes	integral component of membrane [GO:0016021]	integral component of membrane [GO:0016021]	other molecular function	methyltransferase activity [GO:0008168]	methyltransferase activity [GO:0008168]	integral component of membrane [GO:0016021];methyltransferase activity [GO:0008168]	11	6	615	69.5	8.24
1.45712	0.0349044	-0.723516	I1JA26	3-hydroxy-3-methylglutaryl coenzyme A synthase	other metabolic processes	acetyl-CoA metabolic process [GO:0006084];farnesyl diphosphate biosynthetic process, mevalonate pathway [GO:0010142];sterol biosynthetic process [GO:0016126]	NA			NA	other molecular function	hydroxymethylglutaryl-CoA synthase activity [GO:0004421]	hydroxymethylglutaryl-CoA synthase activity [GO:0004421]	acetyl-CoA metabolic process [GO:0006084];farnesyl diphosphate biosynthetic process, mevalonate pathway [GO:0010142];hydroxymethylglutaryl-CoA synthase activity [GO:0004421];sterol biosynthetic process [GO:0016126]	42	12	471	52.2	6.65
2.53534	0.00291512	-0.724701	A0A0R0IXC2	Uncharacterized protein			NA	other membranes	integral component of membrane [GO:0016021]	integral component of membrane [GO:0016021]	other molecular function	heme binding [GO:0020037];iron ion binding [GO:0005506];monooxygenase activity [GO:0004497];oxidoreductase activity, acting on paired donors, with incorporation or reduction of molecular oxygen [GO:0016705]	heme binding	heme binding [GO:0020037];integral component of membrane [GO:0016021];iron ion binding [GO:0005506];monooxygenase activity [GO:0004497];oxidoreductase activity, acting on paired donors, with incorporation or reduction of molecular oxygen [GO:0016705]	33	13	513	58.2	8.47
3.25857	0.000551357	-0.734472	K7LWI4	ATP synthase subunit alpha	other metabolic processes;transport	ATP synthesis coupled proton transport [GO:0015986];defense response to bacterium [GO:0042742];response to cold [GO:0009409]	stress response	mitochondrion;other membranes	chloroplast thylakoid membrane [GO:0009535];mitochondrion [GO:0005739];plastoglobule [GO:0010287];proton-transporting ATP synthase complex, catalytic core F(1) [GO:0045261];stromule [GO:0010319];thylakoid lumen [GO:0031977]	mitochondrion	other molecular function;transporter activity	ATP binding [GO:0005524];proton-transporting ATP synthase activity, rotational mechanism [GO:0046933];zinc ion binding [GO:0008270]	ATP binding	ATP binding [GO:0005524];ATP synthesis coupled proton transport [GO:0015986];chloroplast thylakoid membrane [GO:0009535];defense response to bacterium [GO:0042742];mitochondrion [GO:0005739];plastoglobule [GO:0010287];proton-transporting ATP synthase activity, rotational mechanism [GO:0046933];proton-transporting ATP synthase complex, catalytic core F(1) [GO:0045261];response to cold [GO:0009409]…	12	5	510	55.7	5.21
1.44898	0.0355646	-0.735716	I1KZH4	1,3-beta-glucan synthase	cell organization and biogenesis;other biological processes;other metabolic processes	(1->3)-beta-D-glucan biosynthetic process [GO:0006075]	cell organization and biogenesis	other membranes;plasma membrane	1,3-beta-D-glucan synthase complex [GO:0000148];integral component of membrane [GO:0016021]	plasma membrane	other molecular function	1,3-beta-D-glucan synthase activity [GO:0003843]	1,3-beta-D-glucan synthase activity [GO:0003843]	(1->3)-beta-D-glucan biosynthetic process [GO:0006075];1,3-beta-D-glucan synthase activity [GO:0003843];1,3-beta-D-glucan synthase complex [GO:0000148];integral component of membrane [GO:0016021]	3	4	1958	225.6	9.09
1.40206	0.039622	-0.742429	Q7XA50	Sorbitol-like transporter	transport		transport	other membranes	integral component of membrane [GO:0016021]	integral component of membrane [GO:0016021]	transporter activity	transmembrane transporter activity [GO:0022857]	transporter activity	integral component of membrane [GO:0016021];transmembrane transporter activity [GO:0022857]	6	2	523	56.5	9.23
1.8876	0.012954	-0.746689	K7LCZ8	Cellulose synthase	cell cycle OR cell proliferation;cell organization and biogenesis;other metabolic processes	cell wall organization [GO:0071555];cellulose biosynthetic process [GO:0030244];plant-type primary cell wall biogenesis [GO:0009833]	cell wall organization	ER/Golgi;other membranes;plasma membrane	Golgi apparatus [GO:0005794];integral component of membrane [GO:0016021];plasma membrane [GO:0005886];trans-Golgi network [GO:0005802]	Golgi apparatus	other molecular function	cellulose synthase (UDP-forming) activity [GO:0016760];cellulose synthase activity [GO:0016759];metal ion binding [GO:0046872]	cellulose synthase activity	cell wall organization [GO:0071555];cellulose biosynthetic process [GO:0030244];cellulose synthase (UDP-forming) activity [GO:0016760];cellulose synthase activity [GO:0016759];Golgi apparatus [GO:0005794];integral component of membrane [GO:0016021];metal ion binding [GO:0046872];plant-type primary cell wall biogenesis [GO:0009833];plasma membrane [GO:0005886];trans-Golgi network [GO:0005802]	18	12	1074	120.1	7.39
2.72962	0.00186374	-0.746943	I1M5C1	LEA_2 domain-containing protein			NA	other membranes;plasma membrane	integral component of membrane [GO:0016021];plasma membrane [GO:0005886]	plasma membrane			NA	integral component of membrane [GO:0016021];plasma membrane [GO:0005886]	12	2	254	27.8	10.23
3.96369	0.000108719	-0.757576	I1JUE0	Cellulose synthase	cell cycle OR cell proliferation;cell organization and biogenesis;other metabolic processes	cell wall organization [GO:0071555];cellulose biosynthetic process [GO:0030244];plant-type primary cell wall biogenesis [GO:0009833]	cell wall organization	ER/Golgi;other membranes;plasma membrane	Golgi apparatus [GO:0005794];integral component of membrane [GO:0016021];plasma membrane [GO:0005886];trans-Golgi network [GO:0005802]	Golgi apparatus	other molecular function	cellulose synthase (UDP-forming) activity [GO:0016760];cellulose synthase activity [GO:0016759];metal ion binding [GO:0046872]	cellulose synthase activity	cell wall organization [GO:0071555];cellulose biosynthetic process [GO:0030244];cellulose synthase (UDP-forming) activity [GO:0016760];cellulose synthase activity [GO:0016759];Golgi apparatus [GO:0005794];integral component of membrane [GO:0016021];metal ion binding [GO:0046872];plant-type primary cell wall biogenesis [GO:0009833];plasma membrane [GO:0005886];trans-Golgi network [GO:0005802]	21	14	1084	122	6.76
1.5863	0.0259241	-0.763749	I1K5C5	Uncharacterized protein	stress response	defense response [GO:0006952]	stress response	non-structural extracellular	extracellular region [GO:0005576]	non-structural extracellular			NA	defense response [GO:0006952];extracellular region [GO:0005576]	29	4	245	26.3	8.88
1.62859	0.0235186	-0.765716	I1KD34	COBRA-like protein	cell organization and biogenesis;other metabolic processes	cellulose microfibril organization [GO:0010215];plant-type cell wall biogenesis [GO:0009832];plant-type cell wall cellulose biosynthetic process [GO:0052324];plant-type cell wall organization [GO:0009664]	cell organization and biogenesis	other membranes;plasma membrane	anchored component of plasma membrane [GO:0046658];integral component of membrane [GO:0016021]	plasma membrane			NA	anchored component of plasma membrane [GO:0046658];cellulose microfibril organization [GO:0010215];integral component of membrane [GO:0016021];plant-type cell wall biogenesis [GO:0009832];plant-type cell wall cellulose biosynthetic process [GO:0052324];plant-type cell wall organization [GO:0009664]	10	3	456	50.7	8.6
2.27206	0.0053449	-0.772662	A0A0R0H2Z4	Uncharacterized protein			NA	other membranes	integral component of membrane [GO:0016021]	integral component of membrane [GO:0016021]	other molecular function	heme binding [GO:0020037];iron ion binding [GO:0005506];monooxygenase activity [GO:0004497];oxidoreductase activity, acting on paired donors, with incorporation or reduction of molecular oxygen [GO:0016705]	heme binding	heme binding [GO:0020037];integral component of membrane [GO:0016021];iron ion binding [GO:0005506];monooxygenase activity [GO:0004497];oxidoreductase activity, acting on paired donors, with incorporation or reduction of molecular oxygen [GO:0016705]	29	10	524	59.8	8.94
1.64134	0.022838	-0.777684	O49855	Acid phosphatase	other metabolic processes		other metabolic processes			NA	other molecular function	acid phosphatase activity [GO:0003993]	acid phosphatase activity [GO:0003993]	acid phosphatase activity [GO:0003993]	15	2	264	30.1	7.36
1.94543	0.0113389	-0.781538	C6T599	Uncharacterized protein	other biological processes		other biological processes			NA	enzyme regulator activity	endopeptidase inhibitor activity [GO:0004866]	enzyme regulator activity	endopeptidase inhibitor activity [GO:0004866]	10	2	238	25.9	8.16
2.091	0.00810969	-0.793393	I1KGW2	Plasma membrane ATPase	other biological processes;transport	proton export across plasma membrane [GO:0120029];proton transmembrane transport [GO:1902600];regulation of intracellular pH [GO:0051453]	transport	other membranes;plasma membrane	integral component of membrane [GO:0016021];plasma membrane [GO:0005886]	plasma membrane	other molecular function;transporter activity	ATP binding [GO:0005524];proton-exporting ATPase activity, phosphorylative mechanism [GO:0008553]	ATP binding	ATP binding [GO:0005524];integral component of membrane [GO:0016021];plasma membrane [GO:0005886];proton export across plasma membrane [GO:0120029];proton transmembrane transport [GO:1902600];proton-exporting ATPase activity, phosphorylative mechanism [GO:0008553];regulation of intracellular pH [GO:0051453]	16	13	949	104.4	6.73
1.32414	0.047409	-0.796455	K7L8H9	Uncharacterized protein			NA			NA			NA		8	2	462	52.3	5.49
1.5345	0.0292078	-0.797881	Q2V732	VHS and GAT domain protein	other metabolic processes;protein metabolism;transport	intracellular protein transport [GO:0006886]	protein metabolism		cell [GO:0005623]	cell [GO:0005623]	other molecular function		other molecular function	cell [GO:0005623];intracellular protein transport [GO:0006886]	15	5	672	72.9	5.68
1.70791	0.0195924	-0.799925	A0A0R4J642	Diphthine methyl ester synthase	other metabolic processes;protein metabolism	peptidyl-diphthamide biosynthetic process from peptidyl-histidine [GO:0017183]	protein metabolism			NA	other molecular function	diphthine synthase activity [GO:0004164]	diphthine synthase activity [GO:0004164]	diphthine synthase activity [GO:0004164];peptidyl-diphthamide biosynthetic process from peptidyl-histidine [GO:0017183]	12	2	278	31.2	5.39
3.69931	0.000199841	-0.804238	P12468	Ribulose bisphosphate carboxylase small subunit, chloroplastic 2	other metabolic processes	photorespiration [GO:0009853];reductive pentose-phosphate cycle [GO:0019253]	photorespiration	other cell component	chloroplast [GO:0009507]	chloroplast [GO:0009507]		monooxygenase activity [GO:0004497];ribulose-bisphosphate carboxylase activity [GO:0016984]	monooxygenase activity	chloroplast [GO:0009507];monooxygenase activity [GO:0004497];photorespiration [GO:0009853];reductive pentose-phosphate cycle [GO:0019253];ribulose-bisphosphate carboxylase activity [GO:0016984]	26	4	178	20	8.66
1.49571	0.0319369	-0.810067	I1LKW4	Glyco_trans_2-like domain-containing protein	other metabolic processes		other metabolic processes	ER/Golgi;other membranes	Golgi apparatus [GO:0005794];integral component of membrane [GO:0016021]	Golgi apparatus	other molecular function	mannan synthase activity [GO:0051753];transferase activity, transferring glycosyl groups [GO:0016757]	transferase activity	Golgi apparatus [GO:0005794];integral component of membrane [GO:0016021];mannan synthase activity [GO:0051753];transferase activity, transferring glycosyl groups [GO:0016757]	21	8	542	62.4	9.11
1.71766	0.0191575	-0.815794	I1MER0	Uncharacterized protein			NA			NA	other molecular function	hydrolase activity, acting on ester bonds [GO:0016788]	hydrolase activity	hydrolase activity, acting on ester bonds [GO:0016788]	6	2	389	43.5	6.02
1.46834	0.0340145	-0.828689	I1JZD4	Uncharacterized protein	other metabolic processes;RNA metabolism OR transcription	mRNA processing [GO:0006397]	RNA metabolism OR transcription	nucleus	commitment complex [GO:0000243];nuclear speck [GO:0016607];U2AF [GO:0089701];U2-type prespliceosome [GO:0071004]	nucleus	nucleic acid binding activity	poly-pyrimidine tract binding [GO:0008187];pre-mRNA 3'-splice site binding [GO:0030628]	poly-pyrimidine tract binding	commitment complex [GO:0000243];mRNA processing [GO:0006397];nuclear speck [GO:0016607];poly-pyrimidine tract binding [GO:0008187];pre-mRNA 3'-splice site binding [GO:0030628];U2AF [GO:0089701];U2-type prespliceosome [GO:0071004]	18	5	600	67.6	8.13
1.51251	0.0307249	-0.843217	A0A0R0GMF6	ABC transporter domain-containing protein			NA			NA	other molecular function	ATP binding [GO:0005524];ATPase activity [GO:0016887]	ATP binding	ATP binding [GO:0005524];ATPase activity [GO:0016887]	17	3	296	32.8	6.18
2.91121	0.00122686	-0.851302	I1KHX8	Uncharacterized protein	transport		transport	other membranes	integral component of membrane [GO:0016021]	integral component of membrane [GO:0016021]		transmembrane transporter activity [GO:0022857]	transmembrane transporter activity [GO:0022857]	integral component of membrane [GO:0016021];transmembrane transporter activity [GO:0022857]	25	6	355	38.2	9.29
2.36499	0.00431532	-0.859954	I1LDY0	RNA helicase			NA	nucleus	nucleolus [GO:0005730]	nucleolus [GO:0005730]	nucleic acid binding activity;other molecular function	ATP binding [GO:0005524];RNA binding [GO:0003723];RNA helicase activity [GO:0003724]	ATP binding	ATP binding [GO:0005524];nucleolus [GO:0005730];RNA binding [GO:0003723];RNA helicase activity [GO:0003724]	11	5	697	75.7	8.76
1.71796	0.0191444	-0.868231	K7MRH9	Methyltransferase	other metabolic processes		other metabolic processes	ER/Golgi;other cell component;other cytoplasmic organelle;other membranes	endosome [GO:0005768];Golgi apparatus [GO:0005794];integral component of membrane [GO:0016021];trans-Golgi network [GO:0005802]	Golgi apparatus	other molecular function	methyltransferase activity [GO:0008168]	methyltransferase activity [GO:0008168]	endosome [GO:0005768];Golgi apparatus [GO:0005794];integral component of membrane [GO:0016021];methyltransferase activity [GO:0008168];trans-Golgi network [GO:0005802]	16	8	608	68.7	7.81
3.6554	0.000221103	-0.884735	Q2PMP0	Protein TIC 214	transport	protein transport [GO:0015031]	transport	other membranes	chloroplast inner membrane [GO:0009706];integral component of membrane [GO:0016021]	chloroplast			NA	chloroplast inner membrane [GO:0009706];integral component of membrane [GO:0016021];protein transport [GO:0015031]	4	6	1792	215.8	9.99
2.24933	0.00563214	-0.885699	A0A0R0HGS5	Peroxidase	other biological processes;other metabolic processes;stress response	hydrogen peroxide catabolic process [GO:0042744];response to oxidative stress [GO:0006979]	redox	non-structural extracellular;other cell component	extracellular region [GO:0005576];plant-type cell wall [GO:0009505];plasmodesma [GO:0009506]	extracellular	other molecular function	heme binding [GO:0020037];metal ion binding [GO:0046872];peroxidase activity [GO:0004601]	heme binding	extracellular region [GO:0005576];heme binding [GO:0020037];hydrogen peroxide catabolic process [GO:0042744];metal ion binding [GO:0046872];peroxidase activity [GO:0004601];plant-type cell wall [GO:0009505];plasmodesma [GO:0009506];response to oxidative stress [GO:0006979]	25	7	324	35.4	8.02
3.19475	0.000638629	-0.88959	C6TGX7	Uncharacterized protein			NA			NA	other molecular function	nutrient reservoir activity [GO:0045735]	nutrient reservoir activity [GO:0045735]	nutrient reservoir activity [GO:0045735]	32	8	254	29	8.63
5.71539	1.92577e-06	-0.89217	I1LA99	Uncharacterized protein			NA	other membranes	integral component of membrane [GO:0016021]	integral component of membrane [GO:0016021]			NA	integral component of membrane [GO:0016021]	6	3	759	86.2	5.92
2.05026	0.00890714	-0.907962	C6TMX0	Xyloglucan endotransglucosylase/hydrolase	cell organization and biogenesis;other biological processes;other metabolic processes	cell wall biogenesis [GO:0042546];cell wall organization [GO:0071555];xyloglucan metabolic process [GO:0010411]	cell organization and biogenesis	non-structural extracellular;other cell component	apoplast [GO:0048046];cell wall [GO:0005618]	extracellular	other molecular function	hydrolase activity, hydrolyzing O-glycosyl compounds [GO:0004553];xyloglucan:xyloglucosyl transferase activity [GO:0016762]	xyloglucosyl transferase activity	apoplast [GO:0048046];cell wall [GO:0005618];cell wall biogenesis [GO:0042546];cell wall organization [GO:0071555];hydrolase activity, hydrolyzing O-glycosyl compounds [GO:0004553];xyloglucan metabolic process [GO:0010411];xyloglucan:xyloglucosyl transferase activity [GO:0016762]	21	5	295	34.4	8.95
2.30192	0.00498971	-0.924758	I1N0W2	NAD(P)-bd_dom domain-containing protein	other metabolic processes	nucleotide-sugar metabolic process [GO:0009225]	nucleotide-sugar metabolic process [GO:0009225]			NA	other molecular function	dTDP-glucose 4,6-dehydratase activity [GO:0008460]	dTDP-glucose 4,6-dehydratase activity [GO:0008460]	dTDP-glucose 4,6-dehydratase activity [GO:0008460];nucleotide-sugar metabolic process [GO:0009225]	29	10	594	66.6	7.09
1.38744	0.0409785	-0.928912	A0A0R0GYY6	Abhydrolase_3 domain-containing protein			NA			NA	other molecular function	hydrolase activity [GO:0016787]	hydrolase activity [GO:0016787]	hydrolase activity [GO:0016787]	17	3	273	30.5	5.29
2.55551	0.00278288	-0.937273	C6TAG6	Uncharacterized protein	other metabolic processes;RNA metabolism OR transcription	RNA processing [GO:0006396]	RNA metabolism OR transcription	nucleus;other cell component	nucleus [GO:0005634];ribonucleoprotein complex [GO:1990904]	nucleus	nucleic acid binding activity	RNA binding [GO:0003723]	RNA binding [GO:0003723]	nucleus [GO:0005634];ribonucleoprotein complex [GO:1990904];RNA binding [GO:0003723];RNA processing [GO:0006396]	10	2	405	45.3	6.57
1.88411	0.0130584	-0.942499	C6T433	Alba domain-containing protein			NA			NA	nucleic acid binding activity	nucleic acid binding [GO:0003676]	nucleic acid binding [GO:0003676]	nucleic acid binding [GO:0003676]	49	4	133	14.7	5.17
1.98672	0.0103105	-0.952495	I1NG47	Pyruvate kinase	other metabolic processes	cellular response to insulin stimulus [GO:0032869];glycolytic process [GO:0006096]	cellular response to insulin stimulus [GO:0032869]	other cell component	cytoplasm [GO:0005737]	cytoplasm [GO:0005737]	kinase activity;other molecular function	kinase activity [GO:0016301];magnesium ion binding [GO:0000287];potassium ion binding [GO:0030955];pyruvate kinase activity [GO:0004743]	kinase activity	cellular response to insulin stimulus [GO:0032869];cytoplasm [GO:0005737];glycolytic process [GO:0006096];kinase activity [GO:0016301];magnesium ion binding [GO:0000287];potassium ion binding [GO:0030955];pyruvate kinase activity [GO:0004743]	11	4	582	63.6	5.9
2.39993	0.00398174	-0.95308	C6T5C6	AAI domain-containing protein			NA			NA			NA		53	4	127	13.2	8.06
1.83907	0.0144854	-1.00604	I1KH92	Uncharacterized protein	other metabolic processes	lipid metabolic process [GO:0006629]	lipid metabolic process [GO:0006629]	other cell component;other membranes	integral component of membrane [GO:0016021]	integral component of membrane [GO:0016021]	other molecular function	O-acyltransferase activity [GO:0008374]	O-acyltransferase activity [GO:0008374]	integral component of membrane [GO:0016021];lipid metabolic process [GO:0006629];O-acyltransferase activity [GO:0008374]	8	3	676	75.5	6.73
2.13828	0.00727303	-1.00835	I1MYV1	C2 domain-containing protein	other biological processes		other biological processes	other cell component		other cell component	cytoskeletal activity		cytoskeletal activity		24	32	2134	228.5	5.5
4.14328	7.1898e-05	-1.02289	I1KIC2	Protein kinase domain-containing protein	other metabolic processes;protein metabolism;signal transduction	brassinosteroid mediated signaling pathway [GO:0009742]	protein metabolism	other membranes;plasma membrane		plasma membrane	kinase activity;other molecular function	ATP binding [GO:0005524];protein kinase activity [GO:0004672]	ATP binding	ATP binding [GO:0005524];brassinosteroid mediated signaling pathway [GO:0009742];protein kinase activity [GO:0004672]	13	5	491	55.2	6.1
1.60179	0.0250158	-1.02498	I1MHN0	CMP/dCMP-type deaminase domain-containing protein			NA			NA	other molecular function	hydrolase activity [GO:0016787];zinc ion binding [GO:0008270]	zinc ion binding	hydrolase activity [GO:0016787];zinc ion binding [GO:0008270]	8	2	181	20	6.67
1.90623	0.0124099	-1.03462	P10743	Stem 31 kDa glycoprotein			NA			NA	other molecular function	nutrient reservoir activity [GO:0045735]	nutrient reservoir activity [GO:0045735]	nutrient reservoir activity [GO:0045735]	61	14	254	29.3	7.21
2.0492	0.00892895	-1.05835	I1JGY5	Glucose-6-phosphate isomerase	other metabolic processes	gluconeogenesis [GO:0006094];glucose 6-phosphate metabolic process [GO:0051156];glycolytic process [GO:0006096]	glycolytic process	cytosol	cytosol [GO:0005829]	cytosol [GO:0005829]	other molecular function	glucose-6-phosphate isomerase activity [GO:0004347];intramolecular transferase activity [GO:0016866];monosaccharide binding [GO:0048029]	monosaccharide binding	cytosol [GO:0005829];gluconeogenesis [GO:0006094];glucose 6-phosphate metabolic process [GO:0051156];glucose-6-phosphate isomerase activity [GO:0004347];glycolytic process [GO:0006096];intramolecular transferase activity [GO:0016866];monosaccharide binding [GO:0048029]	50	20	613	67.2	6.09
3.01776	0.000959932	-1.08292	A0A0R4J3X7	MFS domain-containing protein	transport		transport	other membranes	integral component of plasma membrane [GO:0005887]	integral component of plasma membrane [GO:0005887]	transporter activity	myo-inositol:proton symporter activity [GO:0005366]	transporter activity	integral component of plasma membrane [GO:0005887];myo-inositol:proton symporter activity [GO:0005366]	6	3	501	54	5.33
1.51206	0.0307569	-1.08569	C6SYA7	AAI domain-containing protein			NA			NA			NA		22	3	158	18.5	5.24
1.58063	0.0262646	-1.14067	C6TJM1	Fructose-bisphosphate aldolase	other metabolic processes	glycolytic process [GO:0006096]	glycolytic process [GO:0006096]			NA	other molecular function	fructose-bisphosphate aldolase activity [GO:0004332]	fructose-bisphosphate aldolase activity [GO:0004332]	fructose-bisphosphate aldolase activity [GO:0004332];glycolytic process [GO:0006096]	30	7	358	38.5	7.68
2.12787	0.00744954	-1.14572	A0A368UJK6	Uncharacterized protein			NA	other cell component;other membranes;plasma membrane		plasma membrane			NA		7	4	1141	125.3	5.26
3.17914	0.000662005	-1.15177	I1KFE9	Uncharacterized protein			NA			NA	other molecular function	copper ion binding [GO:0005507];oxidoreductase activity [GO:0016491]	copper ion binding	copper ion binding [GO:0005507];oxidoreductase activity [GO:0016491]	15	5	537	60.1	7.77
2.6696	0.00213992	-1.16306	Q3V5S6	Beta-conglycinin alpha subunit			NA			NA		nutrient reservoir activity [GO:0045735]	nutrient reservoir activity [GO:0045735]	nutrient reservoir activity [GO:0045735]	24	11	605	70.2	5.15
1.73497	0.0184091	-1.16816	I1J999	Glycosyltransferases	cell organization and biogenesis;other biological processes;other metabolic processes	cell wall organization [GO:0071555];glucuronoxylan biosynthetic process [GO:0010417];plant-type secondary cell wall biogenesis [GO:0009834]	cell organization and biogenesis	ER/Golgi;other membranes	Golgi membrane [GO:0000139];integral component of membrane [GO:0016021]	Golgi membrane	other molecular function	galactosylgalactosylxylosylprotein 3-beta-glucuronosyltransferase activity [GO:0015018];xylosyltransferase activity [GO:0042285]	xylosyltransferase activity	cell wall organization [GO:0071555];galactosylgalactosylxylosylprotein 3-beta-glucuronosyltransferase activity [GO:0015018];glucuronoxylan biosynthetic process [GO:0010417];Golgi membrane [GO:0000139];integral component of membrane [GO:0016021];plant-type secondary cell wall biogenesis [GO:0009834];xylosyltransferase activity [GO:0042285]	7	2	493	55.4	9.6
2.91353	0.00122032	-1.18845	I1LZN1	Transmembrane 9 superfamily member	other biological processes	protein localization to membrane [GO:0072657]	protein localization to membrane [GO:0072657]	ER/Golgi;other cytoplasmic organelle;other membranes	endosome [GO:0005768];Golgi apparatus [GO:0005794];integral component of membrane [GO:0016021];membrane [GO:0016020];trans-Golgi network [GO:0005802]	Golgi apparatus			NA	endosome [GO:0005768];Golgi apparatus [GO:0005794];integral component of membrane [GO:0016021];membrane [GO:0016020];protein localization to membrane [GO:0072657];trans-Golgi network [GO:0005802]	14	8	682	77.5	6.96
2.56928	0.00269598	-1.22672	Q06765	ADR6 protein			NA			NA			NA		51	7	272	30.4	6.84
2.18749	0.00649403	-1.24795	I1K557	Uncharacterized protein	other metabolic processes;protein metabolism;signal transduction	abscisic acid-activated signaling pathway [GO:0009738];intracellular signal transduction [GO:0035556];peptidyl-serine phosphorylation [GO:0018105];protein autophosphorylation [GO:0046777]	signal transduction	nucleus;other cell component	cytoplasm [GO:0005737];nucleus [GO:0005634]	nucleus	kinase activity;other molecular function	ATP binding [GO:0005524];calcium ion binding [GO:0005509];calcium-dependent protein serine/threonine kinase activity [GO:0009931];calmodulin binding [GO:0005516];calmodulin-dependent protein kinase activity [GO:0004683]	ATP binding	abscisic acid-activated signaling pathway [GO:0009738];ATP binding [GO:0005524];calcium ion binding [GO:0005509];calcium-dependent protein serine/threonine kinase activity [GO:0009931];calmodulin binding [GO:0005516];calmodulin-dependent protein kinase activity [GO:0004683];cytoplasm [GO:0005737];intracellular signal transduction [GO:0035556];nucleus [GO:0005634];peptidyl-serine phosphorylation […	16	5	507	57	5.44
1.94563	0.0113336	-1.25893	C6TG31	Glyceraldehyde-3-phosphate dehydrogenase	other metabolic processes	glucose metabolic process [GO:0006006]	glucose metabolic process [GO:0006006]	other cell component		other cell component	other molecular function	NAD binding [GO:0051287];NADP binding [GO:0050661];oxidoreductase activity, acting on the aldehyde or oxo group of donors, NAD or NADP as acceptor [GO:0016620]	NAD binding	glucose metabolic process [GO:0006006];NAD binding [GO:0051287];NADP binding [GO:0050661];oxidoreductase activity, acting on the aldehyde or oxo group of donors, NAD or NADP as acceptor [GO:0016620]	6	2	452	48.3	7.2
1.89617	0.0127007	-1.29486	I1JDD7	Cellulose synthase	cell cycle OR cell proliferation;cell organization and biogenesis;other metabolic processes	cell wall organization [GO:0071555];cellulose biosynthetic process [GO:0030244];plant-type primary cell wall biogenesis [GO:0009833]	cell organization and biogenesis	ER/Golgi;other membranes;plasma membrane	Golgi apparatus [GO:0005794];integral component of membrane [GO:0016021];plasma membrane [GO:0005886];trans-Golgi network [GO:0005802]	Golgi apparatus	other molecular function	cellulose synthase (UDP-forming) activity [GO:0016760];cellulose synthase activity [GO:0016759];metal ion binding [GO:0046872]	cellulose synthase activity	cell wall organization [GO:0071555];cellulose biosynthetic process [GO:0030244];cellulose synthase (UDP-forming) activity [GO:0016760];cellulose synthase activity [GO:0016759];Golgi apparatus [GO:0005794];integral component of membrane [GO:0016021];metal ion binding [GO:0046872];plant-type primary cell wall biogenesis [GO:0009833];plasma membrane [GO:0005886];trans-Golgi network [GO:0005802]	8	6	1078	121.4	7.18
1.5689	0.0269837	-1.31502	I1K629	Uncharacterized protein	other metabolic processes		other metabolic processes			NA	other molecular function	O-methyltransferase activity [GO:0008171]	O-methyltransferase activity [GO:0008171]	O-methyltransferase activity [GO:0008171]	10	2	250	28.1	6.55
1.80512	0.0156631	-1.31725	I1K345	AAA domain-containing protein	cell organization and biogenesis	cytoplasmic microtubule organization [GO:0031122]	cell organization and biogenesis	nucleus	nucleus [GO:0005634]	nucleus [GO:0005634]	other molecular function	ATP binding [GO:0005524];ATPase activity [GO:0016887];microtubule-severing ATPase activity [GO:0008568]	ATP binding	ATP binding [GO:0005524];ATPase activity [GO:0016887];cytoplasmic microtubule organization [GO:0031122];microtubule-severing ATPase activity [GO:0008568];nucleus [GO:0005634]	15	4	403	45.3	6.48
1.83147	0.0147411	-1.37189	I1LXL0	Uncharacterized protein		endoplasmic reticulum to Golgi vesicle-mediated transport [GO:0006888];retrograde vesicle-mediated transport, Golgi to endoplasmic reticulum [GO:0006890]	transport	ER/Golgi;other cell component;other membranes	COPII-coated ER to Golgi transport vesicle [GO:0030134];endoplasmic reticulum [GO:0005783];integral component of membrane [GO:0016021]	endoplasmic reticulum			NA	COPII-coated ER to Golgi transport vesicle [GO:0030134];endoplasmic reticulum [GO:0005783];endoplasmic reticulum to Golgi vesicle-mediated transport [GO:0006888];integral component of membrane [GO:0016021];retrograde vesicle-mediated transport, Golgi to endoplasmic reticulum [GO:0006890]	9	2	351	40.3	6.89
1.39846	0.0399518	-1.38	A0A0R4J354	Uncharacterized protein	other biological processes;other metabolic processes;transport	mRNA export from nucleus [GO:0006406];regulation of DNA-templated transcription, elongation [GO:0032784]	transport	nucleus	THO complex [GO:0000347];THO complex part of transcription export complex [GO:0000445]	nucleus			NA	mRNA export from nucleus [GO:0006406];regulation of DNA-templated transcription, elongation [GO:0032784];THO complex [GO:0000347];THO complex part of transcription export complex [GO:0000445]	10	3	605	68.9	5.31
1.6464	0.0225738	-1.38131	A0A0R0GI14	Uncharacterized protein	other metabolic processes;protein metabolism		protein metabolism			NA	other molecular function	peptidase activity [GO:0008233]	peptidase activity [GO:0008233]	peptidase activity [GO:0008233]	18	3	370	41.3	4.86
2.75282	0.00176677	-1.43451	I1M6D0	Uncharacterized protein	other metabolic processes	raffinose family oligosaccharide biosynthetic process [GO:0010325]	raffinose family oligosaccharide biosynthetic process [GO:0010325]			NA	other molecular function	catalytic activity [GO:0003824]	catalytic activity [GO:0003824]	catalytic activity [GO:0003824];raffinose family oligosaccharide biosynthetic process [GO:0010325]	17	11	755	83.1	6.14
1.41087	0.0388264	-1.47319	I1K7G0	Methyltransferase	other metabolic processes	steroid biosynthetic process [GO:0006694]	steroid biosynthetic process [GO:0006694]			NA	other molecular function	methyltransferase activity [GO:0008168]	methyltransferase activity [GO:0008168]	methyltransferase activity [GO:0008168];steroid biosynthetic process [GO:0006694]	41	12	363	40.4	6.74
1.93352	0.0116542	-1.48265	A0A0R4J4W7	Peroxidase	other biological processes;other metabolic processes;stress response	hydrogen peroxide catabolic process [GO:0042744];response to oxidative stress [GO:0006979]	redox	non-structural extracellular;other cell component	extracellular region [GO:0005576];plant-type cell wall [GO:0009505];plasmodesma [GO:0009506]	extracellular	other molecular function	heme binding [GO:0020037];metal ion binding [GO:0046872];peroxidase activity [GO:0004601]	heme binding	extracellular region [GO:0005576];heme binding [GO:0020037];hydrogen peroxide catabolic process [GO:0042744];metal ion binding [GO:0046872];peroxidase activity [GO:0004601];plant-type cell wall [GO:0009505];plasmodesma [GO:0009506];response to oxidative stress [GO:0006979]	6	2	329	36.8	6.52
1.38375	0.0413282	-1.54644	I1K7B7	Uncharacterized protein	transport		transport			NA	other molecular function	calcium ion binding [GO:0005509]	calcium ion binding [GO:0005509]	calcium ion binding [GO:0005509]	13	10	1076	117	5.39
1.70609	0.0196746	-1.59945	Q5F2M9	Glutamate dehydrogenase	other metabolic processes	cellular amino acid metabolic process [GO:0006520]	cellular amino acid metabolic process [GO:0006520]	mitochondrion		mitochondrion	other molecular function	nucleotide binding [GO:0000166];oxidoreductase activity, acting on the CH-NH2 group of donors, NAD or NADP as acceptor [GO:0016639]	nucleotide binding	cellular amino acid metabolic process [GO:0006520];nucleotide binding [GO:0000166];oxidoreductase activity, acting on the CH-NH2 group of donors, NAD or NADP as acceptor [GO:0016639]	46	12	411	44.5	6.47
1.3093	0.0490574	-1.66023	A0A0R0HFH0	Protein kinase domain-containing protein	other metabolic processes;protein metabolism		protein metabolism	other membranes	integral component of membrane [GO:0016021]	integral component of membrane [GO:0016021]	kinase activity;other molecular function	ATP binding [GO:0005524];protein kinase activity [GO:0004672]	ATP binding	ATP binding [GO:0005524];integral component of membrane [GO:0016021];protein kinase activity [GO:0004672]	6	3	544	59.4	6.29
1.30408	0.0496506	-1.66677	I1N4Z6	Glyco_hydro_19_cat domain-containing protein	other metabolic processes;stress response	carbohydrate metabolic process [GO:0005975];cell wall macromolecule catabolic process [GO:0016998];chitin catabolic process [GO:0006032]	stress response			NA	other molecular function	chitinase activity [GO:0004568];polysaccharide binding [GO:0030247]	chitinase activity	carbohydrate metabolic process [GO:0005975];cell wall macromolecule catabolic process [GO:0016998];chitin catabolic process [GO:0006032];chitinase activity [GO:0004568];polysaccharide binding [GO:0030247]	10	2	329	36.4	6.37
1.71448	0.0192985	-1.80338	I1KFJ2	Signal peptidase I	other metabolic processes;protein metabolism	signal peptide processing [GO:0006465]	protein metabolism	ER/Golgi;other membranes	integral component of membrane [GO:0016021];signal peptidase complex [GO:0005787]	ER/Golgi	other molecular function	peptidase activity [GO:0008233]	peptidase activity [GO:0008233]	integral component of membrane [GO:0016021];peptidase activity [GO:0008233];signal peptidase complex [GO:0005787];signal peptide processing [GO:0006465]	15	3	180	20	7.12
1.76912	0.017017	-1.80362	K7MSX8	Alba domain-containing protein			NA			NA	nucleic acid binding activity	nucleic acid binding [GO:0003676]	nucleic acid binding [GO:0003676]	nucleic acid binding [GO:0003676]	8	2	321	34.1	9.98
2.80093	0.0015815	-1.83193	I1NCT8	Potassium transporter	transport	potassium ion transport [GO:0006813]	transport	other membranes;plasma membrane	integral component of membrane [GO:0016021];membrane [GO:0016020]	plasma membrane	transporter activity	potassium ion transmembrane transporter activity [GO:0015079]	transporter activity	integral component of membrane [GO:0016021];membrane [GO:0016020];potassium ion transmembrane transporter activity [GO:0015079];potassium ion transport [GO:0006813]	7	3	796	88.4	8.56
3.09519	0.000803171	-1.84185	K7KGX2	Aldo_ket_red domain-containing protein			NA			NA	other molecular function		other molecular function		20	6	412	46.3	5.85
1.56773	0.0270561	-1.85795	A0A0R0EAZ4	Uncharacterized protein	other metabolic processes;protein metabolism		protein metabolism	other membranes;plasma membrane	integral component of membrane [GO:0016021]	plasma membrane	kinase activity;other molecular function	ATP binding [GO:0005524];protein kinase activity [GO:0004672]	ATP binding	ATP binding [GO:0005524];integral component of membrane [GO:0016021];protein kinase activity [GO:0004672]	7	3	733	82.8	6.87
1.7268	0.0187586	-1.90017	A0A0R0E900	Pectin acetylesterase	cell organization and biogenesis	cell wall organization [GO:0071555]	cell organization and biogenesis	non-structural extracellular;other cell component	cell wall [GO:0005618];extracellular region [GO:0005576]	cell wall	other molecular function	hydrolase activity [GO:0016787]	hydrolase activity [GO:0016787]	cell wall [GO:0005618];cell wall organization [GO:0071555];extracellular region [GO:0005576];hydrolase activity [GO:0016787]	19	4	298	33.3	7.77
2.79157	0.00161596	-2.04975	I1M679	Peptidase S59 domain-containing protein	developmental processes;other biological processes;signal transduction;transport	defense response signaling pathway, resistance gene-dependent [GO:0009870];posttranscriptional tethering of RNA polymerase II gene DNA at nuclear periphery [GO:0000973];protein import into nucleus [GO:0006606];response to auxin [GO:0009733];RNA export from nucleus [GO:0006405];telomere tethering at nuclear periphery [GO:0034398]	transport	nucleus;other membranes	nuclear membrane [GO:0031965];nuclear pore cytoplasmic filaments [GO:0044614]	nucleus;other membranes	other molecular function	nuclear localization sequence binding [GO:0008139];RNA binding [GO:0003723];structural constituent of nuclear pore [GO:0017056]	RNA binding	defense response signaling pathway, resistance gene-dependent [GO:0009870];nuclear localization sequence binding [GO:0008139];nuclear membrane [GO:0031965];nuclear pore cytoplasmic filaments [GO:0044614];posttranscriptional tethering of RNA polymerase II gene DNA at nuclear periphery [GO:0000973];protein import into nucleus [GO:0006606];response to auxin [GO:0009733];RNA binding [GO:0003723];RNA …	3	2	1022	116.1	5.54
2.21261	0.00612898	-2.06039	A0A0R0F2C6	Uncharacterized protein	other metabolic processes;protein metabolism;transport	intracellular protein transport [GO:0006886]	protein metabolism		cell [GO:0005623]	cell [GO:0005623]	other molecular function		other molecular function	cell [GO:0005623];intracellular protein transport [GO:0006886]	6	2	704	77.1	7.62
1.60014	0.0251107	-2.12909	A0A0R0JA68	ANK_REP_REGION domain-containing protein			NA			NA	other molecular function	ATP binding [GO:0005524]	ATP binding [GO:0005524]	ATP binding [GO:0005524]	9	2	433	48.7	6.07
3.08966	0.000813469	-2.16866	C6TJ36	Xyloglucan endotransglucosylase/hydrolase	cell organization and biogenesis;other biological processes;other metabolic processes	cell wall biogenesis [GO:0042546];cell wall organization [GO:0071555];xyloglucan metabolic process [GO:0010411]	cell organization and biogenesis	non-structural extracellular;other cell component	apoplast [GO:0048046];cell wall [GO:0005618]	extracellular	other molecular function	hydrolase activity, hydrolyzing O-glycosyl compounds [GO:0004553];xyloglucan:xyloglucosyl transferase activity [GO:0016762]	hydrolase activity	apoplast [GO:0048046];cell wall [GO:0005618];cell wall biogenesis [GO:0042546];cell wall organization [GO:0071555];hydrolase activity, hydrolyzing O-glycosyl compounds [GO:0004553];xyloglucan metabolic process [GO:0010411];xyloglucan:xyloglucosyl transferase activity [GO:0016762]	7	2	302	34.2	5.76
1.4277	0.0373506	-2.16973	Q9ZNZ4	Napin-type 2S albumin 1			NA			NA			NA		21	3	155	17.8	6.38
1.34033	0.0456745	-2.22984	I1JRY5	Uncharacterized protein	transport		transport	other membranes	integral component of membrane [GO:0016021]	integral component of membrane [GO:0016021]		transmembrane transporter activity [GO:0022857]	transmembrane transporter activity [GO:0022857]	integral component of membrane [GO:0016021];transmembrane transporter activity [GO:0022857]	16	4	345	37.4	9.55
3.88227	0.00013114	-2.2512	K7LBF4	Uncharacterized protein	other metabolic processes	glucan catabolic process [GO:0009251]	glucan catabolic process [GO:0009251]	non-structural extracellular;other membranes	integral component of membrane [GO:0016021]	integral component of membrane [GO:0016021]	other molecular function	beta-glucosidase activity [GO:0008422]	beta-glucosidase activity [GO:0008422]	beta-glucosidase activity [GO:0008422];glucan catabolic process [GO:0009251];integral component of membrane [GO:0016021]	9	4	662	72.2	6.48
1.82648	0.0149115	-2.60517	C6TJ04	Inositol oxygenase	other metabolic processes	inositol catabolic process [GO:0019310]	inositol catabolic process [GO:0019310]	other cell component	cytoplasm [GO:0005737]	cytoplasm [GO:0005737]	other molecular function	inositol oxygenase activity [GO:0050113];iron ion binding [GO:0005506]	iron ion binding	cytoplasm [GO:0005737];inositol catabolic process [GO:0019310];inositol oxygenase activity [GO:0050113];iron ion binding [GO:0005506]	24	2	312	36.2	4.97
2.21967	0.00603013	-2.67955	F7J077	Beta-conglycinin beta subunit 2			NA	ER/Golgi;other cell component;other cytoplasmic organelle	aleurone grain [GO:0033095];endoplasmic reticulum [GO:0005783];protein storage vacuole [GO:0000326]	endoplasmic reticulum		nutrient reservoir activity [GO:0045735]	nutrient reservoir activity [GO:0045735]	aleurone grain [GO:0033095];endoplasmic reticulum [GO:0005783];nutrient reservoir activity [GO:0045735];protein storage vacuole [GO:0000326]	24	9	439	50.4	6.24
2.47588	0.00334286	-2.7117	K7MCG1	WD_REPEATS_REGION domain-containing protein	cell organization and biogenesis;other metabolic processes;RNA metabolism OR transcription	maturation of SSU-rRNA from tricistronic rRNA transcript (SSU-rRNA, 5.8S rRNA, LSU-rRNA) [GO:0000462];ribosomal small subunit assembly [GO:0000028]	cell organization and biogenesis	nucleus;other cell component	Pwp2p-containing subcomplex of 90S preribosome [GO:0034388];small-subunit processome [GO:0032040]	nucleus			NA	maturation of SSU-rRNA from tricistronic rRNA transcript (SSU-rRNA, 5.8S rRNA, LSU-rRNA) [GO:0000462];Pwp2p-containing subcomplex of 90S preribosome [GO:0034388];ribosomal small subunit assembly [GO:0000028];small-subunit processome [GO:0032040]	3	2	898	99.6	7.06
2.20893	0.00618112	-2.72523	D4N5G0	Alpha-form rubisco activase			NA	other cell component	chloroplast stroma [GO:0009570];thylakoid [GO:0009579]	chloroplast	enzyme regulator activity;other molecular function	ATP binding [GO:0005524];ribulose-1,5-bisphosphate carboxylase/oxygenase activator activity [GO:0046863]	ATP binding	ATP binding [GO:0005524];chloroplast stroma [GO:0009570];ribulose-1,5-bisphosphate carboxylase/oxygenase activator activity [GO:0046863];thylakoid [GO:0009579]	7	2	478	52.2	6.25
1.35409	0.0442498	-2.72651	A0A0R0EZ76	Uncharacterized protein			NA	ER/Golgi;other cytoplasmic organelle		ER/Golgi	other molecular function	nutrient reservoir activity [GO:0045735]	nutrient reservoir activity [GO:0045735]	nutrient reservoir activity [GO:0045735]	17	4	481	54.2	5.97
1.37301	0.0423637	-2.74089	I1KZ32	Uncharacterized protein			NA	cytosol;other cell component	cytosol [GO:0005829];ribonucleoprotein complex [GO:1990904]	cytosol	nucleic acid binding activity	mRNA binding [GO:0003729]	mRNA binding [GO:0003729]	cytosol [GO:0005829];mRNA binding [GO:0003729];ribonucleoprotein complex [GO:1990904]	11	3	462	49.4	5.08
2.79021	0.00162104	-2.74156	C6TCV2	Aconitase_C domain-containing protein			NA			NA			NA		48	3	130	14.2	6.79
3.02211	0.00095037	-2.79297	K7KGL5	Uncharacterized protein	other biological processes	regulation of transcription, DNA-templated [GO:0006355]	regulation of transcription, DNA-templated [GO:0006355]			NA			NA	regulation of transcription, DNA-templated [GO:0006355]	8	6	1102	121.3	7.03
2.27354	0.00532678	-2.79855	I1M9K9	Uncharacterized protein			NA	other cell component	plant-type cell wall [GO:0009505]	plant-type cell wall [GO:0009505]			NA	plant-type cell wall [GO:0009505]	17	4	366	39.8	7.74
2.71663	0.00192032	-2.80632	I1KNJ6	Cytochrome b561 and DOMON domain-containing protein		oxidation-reduction process [GO:0055114]	oxidation-reduction process [GO:0055114]	other membranes	integral component of membrane [GO:0016021]	integral component of membrane [GO:0016021]	other molecular function		other molecular function	integral component of membrane [GO:0016021];oxidation-reduction process [GO:0055114]	6	2	402	43.9	9.2
1.39837	0.0399605	-3.07743	C6SWW1	Uncharacterized protein			NA			NA			NA		25	4	217	23.7	6.95
1.98588	0.0103304	-3.12036	I1MIA8	Uncharacterized protein			NA			NA	other molecular function	calcium ion binding [GO:0005509]	calcium ion binding [GO:0005509]	calcium ion binding [GO:0005509]	49	6	137	15.2	4.64
2.72991	0.00186245	-3.1762	I1L327	PPPDE domain-containing protein	other metabolic processes;protein metabolism		protein metabolism			NA	other molecular function		other molecular function		15	3	248	27.2	7.34
2.50879	0.00309889	-3.28623	I1MKT0	Uncharacterized protein	other metabolic processes	carbohydrate metabolic process [GO:0005975]	carbohydrate metabolic process [GO:0005975]	other cell component		other cell component	other molecular function	polygalacturonase activity [GO:0004650]	polygalacturonase activity [GO:0004650]	carbohydrate metabolic process [GO:0005975];polygalacturonase activity [GO:0004650]	10	3	491	54.1	8.44
1.67759	0.0210094	-3.29853	C6TI83	BURP domain-containing protein			NA			NA			NA		21	5	276	30.9	6.21
2.31426	0.00484997	-3.35424	A0A0R0KKD6	Uncharacterized protein			NA	ER/Golgi;other cytoplasmic organelle		ER/Golgi	other molecular function	nutrient reservoir activity [GO:0045735]	nutrient reservoir activity [GO:0045735]	nutrient reservoir activity [GO:0045735]	54	15	495	55.7	6.23
2.94411	0.00113734	-3.36974	I1L0J1	CRAL-TRIO domain-containing protein	cell cycle OR cell proliferation;other biological processes		cell cycle OR cell proliferation			NA	other molecular function		other molecular function		16	5	467	52.9	5.16
2.83742	0.00145406	-3.42395	K7LMI3	K Homology domain-containing protein			NA			NA	nucleic acid binding activity	RNA binding [GO:0003723]	RNA binding [GO:0003723]	RNA binding [GO:0003723]	11	6	794	84.2	5.06
2.2816	0.00522873	-3.4587	I1M1F3	alpha-1,2-Mannosidase	other metabolic processes	metabolic process [GO:0008152]	metabolic process [GO:0008152]	other membranes	integral component of membrane [GO:0016021]	integral component of membrane [GO:0016021]	other molecular function	calcium ion binding [GO:0005509];mannosyl-oligosaccharide 1,2-alpha-mannosidase activity [GO:0004571]	calcium ion binding	calcium ion binding [GO:0005509];integral component of membrane [GO:0016021];mannosyl-oligosaccharide 1,2-alpha-mannosidase activity [GO:0004571];metabolic process [GO:0008152]	5	2	610	67.8	7.09
2.59513	0.0025402	-3.62337	A0A0R0GMV1	Cupin type-1 domain-containing protein			NA	ER/Golgi;other cytoplasmic organelle		ER/Golgi	other molecular function	nutrient reservoir activity [GO:0045735]	nutrient reservoir activity [GO:0045735]	nutrient reservoir activity [GO:0045735]	17	4	489	55.1	5.6
3.09217	0.000808775	-3.77019	I1N036	Proliferating cell nuclear antigen	DNA metabolism;other biological processes;other metabolic processes;stress response	leading strand elongation [GO:0006272];mismatch repair [GO:0006298];regulation of DNA replication [GO:0006275];translesion synthesis [GO:0019985]	DNA metabolism	nucleus	nucleus [GO:0005634];PCNA complex [GO:0043626]	nucleus	enzyme regulator activity;nucleic acid binding activity	DNA binding [GO:0003677];DNA polymerase processivity factor activity [GO:0030337]	DNA binding	DNA binding [GO:0003677];DNA polymerase processivity factor activity [GO:0030337];leading strand elongation [GO:0006272];mismatch repair [GO:0006298];nucleus [GO:0005634];PCNA complex [GO:0043626];regulation of DNA replication [GO:0006275];translesion synthesis [GO:0019985]	55	9	266	29.5	4.79
1.64618	0.0225848	-3.82662	I1KWV5	Ubiquitin receptor RAD23	DNA metabolism;other metabolic processes;protein metabolism;stress response	nucleotide-excision repair [GO:0006289];proteasome-mediated ubiquitin-dependent protein catabolic process [GO:0043161]	DNA metabolism	cytosol;nucleus	cytosol [GO:0005829];nucleoplasm [GO:0005654];proteasome complex [GO:0000502]	cytosol	nucleic acid binding activity;other molecular function	damaged DNA binding [GO:0003684];polyubiquitin modification-dependent protein binding [GO:0031593];proteasome binding [GO:0070628];ubiquitin binding [GO:0043130]	proteasome binding	cytosol [GO:0005829];damaged DNA binding [GO:0003684];nucleoplasm [GO:0005654];nucleotide-excision repair [GO:0006289];polyubiquitin modification-dependent protein binding [GO:0031593];proteasome binding [GO:0070628];proteasome complex [GO:0000502];proteasome-mediated ubiquitin-dependent protein catabolic process [GO:0043161];ubiquitin binding [GO:0043130]	24	7	401	42	4.84
1.46561	0.0342284	-3.85683	C6TBW8	Dihydrodipicolinate reductase	other metabolic processes	lysine biosynthetic process via diaminopimelate [GO:0009089]	lysine biosynthetic process via diaminopimelate [GO:0009089]			NA	other molecular function	4-hydroxy-tetrahydrodipicolinate reductase [GO:0008839];NADPH binding [GO:0070402]	NADPH binding	4-hydroxy-tetrahydrodipicolinate reductase [GO:0008839];lysine biosynthetic process via diaminopimelate [GO:0009089];NADPH binding [GO:0070402]	11	3	344	37.4	6.95
2.65004	0.00223854	-3.91652	A0A0R0IL99	Glutamate--cysteine ligase	other metabolic processes	glutathione biosynthetic process [GO:0006750]	glutathione biosynthetic process [GO:0006750]	other cell component	chloroplast [GO:0009507]	chloroplast [GO:0009507]	other molecular function	ATP binding [GO:0005524];glutamate-cysteine ligase activity [GO:0004357]	ATP binding [GO:0005524]	ATP binding [GO:0005524];chloroplast [GO:0009507];glutamate-cysteine ligase activity [GO:0004357];glutathione biosynthetic process [GO:0006750]	26	10	510	57.6	8.07
1.61819	0.0240886	-3.99983	A0A0R0KVB4	Peptidase A1 domain-containing protein	protein metabolism		protein metabolism			NA	other molecular function	aspartic-type endopeptidase activity [GO:0004190]	aspartic-type endopeptidase activity [GO:0004190]	aspartic-type endopeptidase activity [GO:0004190]	29	7	427	46.4	8.32
3.08989	0.000813038	-6.11449	A0A0R0KRW0	Cupin type-1 domain-containing protein			NA	ER/Golgi;other cytoplasmic organelle		ER/Golgi	other molecular function	nutrient reservoir activity [GO:0045735]	nutrient reservoir activity [GO:0045735]	nutrient reservoir activity [GO:0045735]	56	14	387	43.4	5.22

## Sheet: Table S3
Table S3. List of changed proteins in soybean root with plant-derived smoke solution under salt stress compared with salt stress only.
#NAME?	p-value	Difference	Accession	Description	Biological Process	Gene ontology (biological process)	XXX	Cellular Component	Gene ontology (cellular component)	XXX	Molecular Function	Gene ontology (molecular function)	XXX	Gene ontology (GO)	Coverage in Percent	Number of Peptides	Number of AAs	MW in kDa	calc pI
2.3458	0.00451026	4.90482	C6TI83	BURP domain-containing protein			NA			NA			NA		21	5	276	30.9	6.21
1.49808	0.0317632	4.87808	I1MDT8	Serine decarboxylase	other metabolic processes	carboxylic acid metabolic process [GO:0019752]	carboxylic acid metabolic process [GO:0019752]			NA	other molecular function	carboxy-lyase activity [GO:0016831];pyridoxal phosphate binding [GO:0030170]	NA	carboxylic acid metabolic process [GO:0019752];carboxy-lyase activity [GO:0016831];pyridoxal phosphate binding [GO:0030170]	16	5	485	54.7	6.14
4.14882	7.09875e-05	4.85301	I1JQB4	FAS1 domain-containing protein			NA			NA			NA		15	3	453	50.1	6.46
1.9738	0.0106219	4.73377	I1KWV5	Ubiquitin receptor RAD23	DNA metabolism;other metabolic processes;protein metabolism;stress response	nucleotide-excision repair [GO:0006289];proteasome-mediated ubiquitin-dependent protein catabolic process [GO:0043161]	stress response	cytosol;nucleus	cytosol [GO:0005829];nucleoplasm [GO:0005654];proteasome complex [GO:0000502]	cytosol	nucleic acid binding activity;other molecular function	damaged DNA binding [GO:0003684];polyubiquitin modification-dependent protein binding [GO:0031593];proteasome binding [GO:0070628];ubiquitin binding [GO:0043130]	nucleic acid binding activity	cytosol [GO:0005829];damaged DNA binding [GO:0003684];nucleoplasm [GO:0005654];nucleotide-excision repair [GO:0006289];polyubiquitin modification-dependent protein binding [GO:0031593];proteasome binding [GO:0070628];proteasome complex [GO:0000502];proteasome-mediated ubiquitin-dependent protein catabolic process [GO:0043161];ubiquitin binding [GO:0043130]	24	7	401	42	4.84
2.67802	0.00209882	4.19787	A0A0R0EAL6	PKS_ER domain-containing protein	other metabolic processes	lignin biosynthetic process [GO:0009809]	lignin biosynthetic process [GO:0009809]			NA	other molecular function	cinnamyl-alcohol dehydrogenase activity [GO:0045551];oxidoreductase activity, acting on the CH-OH group of donors, NAD or NADP as acceptor [GO:0016616];zinc ion binding [GO:0008270]	zinc ion binding [GO:0008270]	cinnamyl-alcohol dehydrogenase activity [GO:0045551];lignin biosynthetic process [GO:0009809];oxidoreductase activity, acting on the CH-OH group of donors, NAD or NADP as acceptor [GO:0016616];zinc ion binding [GO:0008270]	50	13	357	39	5.8
1.74161	0.0181296	4.08657	K7KZF3	Fe2OG dioxygenase domain-containing protein			NA			NA	other molecular function	dioxygenase activity [GO:0051213];metal ion binding [GO:0046872]	metal ion binding [GO:0046872]	dioxygenase activity [GO:0051213];metal ion binding [GO:0046872]	12	3	314	35.9	6.09
1.46928	0.033941	3.8789	C6TBW8	Dihydrodipicolinate reductase	other metabolic processes	lysine biosynthetic process via diaminopimelate [GO:0009089]	lysine biosynthetic process via diaminopimelate [GO:0009089]			NA	other molecular function	4-hydroxy-tetrahydrodipicolinate reductase [GO:0008839];NADPH binding [GO:0070402]	NADPH binding [GO:0070402]	4-hydroxy-tetrahydrodipicolinate reductase [GO:0008839];lysine biosynthetic process via diaminopimelate [GO:0009089];NADPH binding [GO:0070402]	11	3	344	37.4	6.95
2.62307	0.00238194	3.8521	I1K0I8	AT-hook motif nuclear-localized protein			NA	nucleus		NA	nucleic acid binding activity	AT DNA binding [GO:0003680]	nucleic acid binding activity	AT DNA binding [GO:0003680]	14	2	327	33.4	8.95
3.54516	0.000284997	3.84618	I1MDR1	Transmembrane protein 87B			NA	ER/Golgi;other membranes	integral component of membrane [GO:0016021]	ER/Golgi			NA	integral component of membrane [GO:0016021]	6	2	516	58.2	6.46
5.52015	3.01889e-06	3.81643	C6TJ36	Xyloglucan endotransglucosylase/hydrolase	cell organization and biogenesis;other biological processes;other metabolic processes	cell wall biogenesis [GO:0042546];cell wall organization [GO:0071555];xyloglucan metabolic process [GO:0010411]	cell organization and biogenesis	non-structural extracellular;other cell component	apoplast [GO:0048046];cell wall [GO:0005618]	cell wall [GO:0005618]	other molecular function	hydrolase activity, hydrolyzing O-glycosyl compounds [GO:0004553];xyloglucan:xyloglucosyl transferase activity [GO:0016762]	hydrolase activity	apoplast [GO:0048046];cell wall [GO:0005618];cell wall biogenesis [GO:0042546];cell wall organization [GO:0071555];hydrolase activity, hydrolyzing O-glycosyl compounds [GO:0004553];xyloglucan metabolic process [GO:0010411];xyloglucan:xyloglucosyl transferase activity [GO:0016762]	7	2	302	34.2	5.76
3.09208	0.00080895	3.81303	I1L0J1	CRAL-TRIO domain-containing protein	cell cycle OR cell proliferation;other biological processes		cell cycle OR cell proliferation			NA	other molecular function		other molecular function		16	5	467	52.9	5.16
2.33461	0.00462795	3.73393	I1NDJ5	Macro domain-containing protein			NA			NA			NA		6	2	557	62.5	6.87
3.08298	0.000826074	3.72452	A0A0R0JA68	ANK_REP_REGION domain-containing protein			NA			NA	other molecular function	ATP binding [GO:0005524]	ATP binding [GO:0005524]	ATP binding [GO:0005524]	9	2	433	48.7	6.07
1.39205	0.0405464	3.7212	A0A0R0LAG8	Protein kinase domain-containing protein	other metabolic processes;protein metabolism		protein metabolism	other membranes	integral component of membrane [GO:0016021]	integral component of membrane [GO:0016021]	kinase activity;other molecular function	ATP binding [GO:0005524];protein kinase activity [GO:0004672]	ATP binding [GO:0005524]	ATP binding [GO:0005524];integral component of membrane [GO:0016021];protein kinase activity [GO:0004672]	5	2	660	70.4	9.36
1.56523	0.0272127	3.69438	I1MXX4	PfkB domain-containing protein			NA			NA			NA		18	3	376	40.4	5.29
1.62239	0.0238569	3.6388	A0A0R4J2Y7	ATP:AMP phosphotransferase	other metabolic processes		other metabolic processes	mitochondrion;other cell component		mitochondrion	kinase activity;other molecular function	adenylate kinase activity [GO:0004017];ATP binding [GO:0005524]	ATP binding [GO:0005524]	adenylate kinase activity [GO:0004017];ATP binding [GO:0005524]	42	7	267	29	7.69
2.48522	0.00327178	3.51204	I1M1F3	alpha-1,2-Mannosidase	other metabolic processes	metabolic process [GO:0008152]	metabolic process [GO:0008152]	other membranes	integral component of membrane [GO:0016021]	integral component of membrane [GO:0016021]	other molecular function	calcium ion binding [GO:0005509];mannosyl-oligosaccharide 1,2-alpha-mannosidase activity [GO:0004571]	calcium ion binding [GO:0005509]	calcium ion binding [GO:0005509];integral component of membrane [GO:0016021];mannosyl-oligosaccharide 1,2-alpha-mannosidase activity [GO:0004571];metabolic process [GO:0008152]	5	2	610	67.8	7.09
2.77051	0.00169624	3.37605	I1L327	PPPDE domain-containing protein	other metabolic processes;protein metabolism		protein metabolism			NA	other molecular function		other molecular function		15	3	248	27.2	7.34
4.06318	8.64616e-05	3.36422	K7KUN4	Transcription elongation factor SPT5	other biological processes;other metabolic processes;protein metabolism;RNA metabolism OR transcription	regulation of DNA-templated transcription, elongation [GO:0032784];regulation of transcription by RNA polymerase II [GO:0006357];transcription elongation from RNA polymerase II promoter [GO:0006368];translation [GO:0006412]	RNA metabolism OR transcription	nucleus;translational apparatus	DSIF complex [GO:0032044];ribosome [GO:0005840]	nucleus	nucleic acid binding activity;other molecular function	mRNA binding [GO:0003729];structural constituent of ribosome [GO:0003735]	mRNA binding [GO:0003729]	DSIF complex [GO:0032044];mRNA binding [GO:0003729];regulation of DNA-templated transcription, elongation [GO:0032784];regulation of transcription by RNA polymerase II [GO:0006357];ribosome [GO:0005840];structural constituent of ribosome [GO:0003735];transcription elongation from RNA polymerase II promoter [GO:0006368];translation [GO:0006412]	5	3	1039	115	5.5
2.73734	0.00183089	3.34899	I1MKT0	Uncharacterized protein	other metabolic processes	carbohydrate metabolic process [GO:0005975]	carbohydrate metabolic process [GO:0005975]	other cell component		other cell component	other molecular function	polygalacturonase activity [GO:0004650]	polygalacturonase activity [GO:0004650]	carbohydrate metabolic process [GO:0005975];polygalacturonase activity [GO:0004650]	10	3	491	54.1	8.44
1.66375	0.0216896	3.33966	I1KZ32	Uncharacterized protein			NA	cytosol;other cell component	cytosol [GO:0005829];ribonucleoprotein complex [GO:1990904]	cytosol	nucleic acid binding activity	mRNA binding [GO:0003729]	mRNA binding [GO:0003729]	cytosol [GO:0005829];mRNA binding [GO:0003729];ribonucleoprotein complex [GO:1990904]	11	3	462	49.4	5.08
2.78789	0.0016297	3.29521	K7LMI3	Uncharacterized protein			NA			NA	nucleic acid binding activity	RNA binding [GO:0003723]	RNA binding [GO:0003723]	RNA binding [GO:0003723]	11	6	794	84.2	5.06
2.31191	0.00487634	3.21953	A0A0R0IL99	Glutamate--cysteine ligase	other metabolic processes	glutathione biosynthetic process [GO:0006750]	glutathione biosynthetic process [GO:0006750]	other cell component	chloroplast [GO:0009507]	chloroplast [GO:0009507]	other molecular function	ATP binding [GO:0005524];glutamate-cysteine ligase activity [GO:0004357]	ATP binding [GO:0005524]	ATP binding [GO:0005524];chloroplast [GO:0009507];glutamate-cysteine ligase activity [GO:0004357];glutathione biosynthetic process [GO:0006750]	26	10	510	57.6	8.07
1.89445	0.0127512	3.2182	I1LZP5	Uncharacterized protein			NA			NA			NA		3	2	1114	122.7	7.88
1.41475	0.0384817	3.20763	I1N036	Proliferating cell nuclear antigen	DNA metabolism;other biological processes;other metabolic processes;stress response	leading strand elongation [GO:0006272];mismatch repair [GO:0006298];regulation of DNA replication [GO:0006275];translesion synthesis [GO:0019985]	stress response	nucleus	nucleus [GO:0005634];PCNA complex [GO:0043626]	nucleus	enzyme regulator activity;nucleic acid binding activity	DNA binding [GO:0003677];DNA polymerase processivity factor activity [GO:0030337]	nucleic acid binding activity	DNA binding [GO:0003677];DNA polymerase processivity factor activity [GO:0030337];leading strand elongation [GO:0006272];mismatch repair [GO:0006298];nucleus [GO:0005634];PCNA complex [GO:0043626];regulation of DNA replication [GO:0006275];translesion synthesis [GO:0019985]	55	9	266	29.5	4.79
2.25778	0.00552362	3.12889	A0A0R0EIR6	Glycosyltransferase			NA		intracellular membrane-bounded organelle [GO:0043231]	intracellular membrane-bounded organelle [GO:0043231]	other molecular function	transferase activity, transferring hexosyl groups [GO:0016758];UDP-glycosyltransferase activity [GO:0008194]	transferase activity	intracellular membrane-bounded organelle [GO:0043231];transferase activity, transferring hexosyl groups [GO:0016758];UDP-glycosyltransferase activity [GO:0008194]	8	2	482	54.4	5.92
2.17957	0.00661341	2.99054	I1JM61	GTP cyclohydrolase 1	other metabolic processes	tetrahydrobiopterin biosynthetic process [GO:0006729];tetrahydrofolate biosynthetic process [GO:0046654]	NA	other cell component	cytoplasm [GO:0005737]	cytoplasm [GO:0005737]	other molecular function	GTP binding [GO:0005525];GTP cyclohydrolase I activity [GO:0003934];zinc ion binding [GO:0008270]	zinc ion binding [GO:0008270]	cytoplasm [GO:0005737];GTP binding [GO:0005525];GTP cyclohydrolase I activity [GO:0003934];tetrahydrobiopterin biosynthetic process [GO:0006729];tetrahydrofolate biosynthetic process [GO:0046654];zinc ion binding [GO:0008270]	13	3	459	50.9	6.35
2.81978	0.00151434	2.935	C6TCV2	Aconitase_C domain-containing protein			NA			NA			NA		48	3	130	14.2	6.79
1.52331	0.0299704	2.93202	K7M4T2	Cysteine proteinase inhibitor	other biological processes		other biological processes			NA	enzyme regulator activity	cysteine-type endopeptidase inhibitor activity [GO:0004869]	enzyme regulator activity	cysteine-type endopeptidase inhibitor activity [GO:0004869]	23	2	143	16.1	4.91
1.59061	0.0256681	2.92481	A0A0R0F5B0	Epimerase domain-containing protein			NA	other membranes	integral component of membrane [GO:0016021]	integral component of membrane [GO:0016021]	other molecular function	catalytic activity [GO:0003824];coenzyme binding [GO:0050662]	catalytic activity [GO:0003824]	catalytic activity [GO:0003824];coenzyme binding [GO:0050662];integral component of membrane [GO:0016021]	13	3	439	48.3	9.67
1.88375	0.0130692	2.9089	I1LP75	AAA domain-containing protein	cell organization and biogenesis	mitochondrion organization [GO:0007005]	cell organization and biogenesis	mitochondrion	mitochondrion [GO:0005739]	mitochondrion	other molecular function	ATP binding [GO:0005524];zinc ion binding [GO:0008270]	ATP binding [GO:0005524]	ATP binding [GO:0005524];mitochondrion [GO:0005739];mitochondrion organization [GO:0007005];zinc ion binding [GO:0008270]	18	9	617	68.4	9.29
3.6398	0.000229195	2.77031	I1NCT8	Potassium transporter	transport	potassium ion transport [GO:0006813]	transport	other membranes;plasma membrane	integral component of membrane [GO:0016021];membrane [GO:0016020]	plasma membrane	transporter activity	potassium ion transmembrane transporter activity [GO:0015079]	transporter activity	integral component of membrane [GO:0016021];membrane [GO:0016020];potassium ion transmembrane transporter activity [GO:0015079];potassium ion transport [GO:0006813]	7	3	796	88.4	8.56
3.32508	0.00047306	2.74237	I1LWR8	Biotin carboxyl carrier protein of acetyl-CoA carboxylase	other metabolic processes	fatty acid biosynthetic process [GO:0006633]	fatty acid biosynthetic process [GO:0006633]	other cell component	acetyl-CoA carboxylase complex [GO:0009317];chloroplast [GO:0009507]	NA	other molecular function	acetyl-CoA carboxylase activity [GO:0003989]	acetyl-CoA carboxylase activity [GO:0003989]	acetyl-CoA carboxylase activity [GO:0003989];acetyl-CoA carboxylase complex [GO:0009317];chloroplast [GO:0009507];fatty acid biosynthetic process [GO:0006633]	19	3	276	28.9	8.43
1.87213	0.0134235	2.6138	I1KFG9	Uncharacterized protein			NA			NA			NA		15	3	447	49.6	6.84
1.30151	0.0499447	2.5428	I1MS56	Uncharacterized protein	other biological processes	protein folding [GO:0006457]	protein folding [GO:0006457]			NA	other molecular function	ATP binding [GO:0005524]	ATP binding [GO:0005524]	ATP binding [GO:0005524];protein folding [GO:0006457]	31	4	197	20.7	6
1.64165	0.0228216	2.49492	I1JJW7	SEC7 domain-containing protein	other biological processes;transport	regulation of ARF protein signal transduction [GO:0032012];vesicle-mediated transport [GO:0016192]	transport	cytosol;ER/Golgi;other membranes	trans-Golgi network [GO:0005802]	cytosol	enzyme regulator activity	ARF guanyl-nucleotide exchange factor activity [GO:0005086]	enzyme regulator activity	ARF guanyl-nucleotide exchange factor activity [GO:0005086];regulation of ARF protein signal transduction [GO:0032012];trans-Golgi network [GO:0005802];vesicle-mediated transport [GO:0016192]	4	4	1721	190.9	6.2
1.35239	0.044423	2.38369	A0A368UHT3	AIG1-type G domain-containing protein			NA			NA	other molecular function	GTP binding [GO:0005525]	GTP binding [GO:0005525]	GTP binding [GO:0005525]	10	3	336	37.7	5.19
2.30163	0.00499305	2.38093	I1KNJ6	Cytochrome b561 and DOMON domain-containing protein		oxidation-reduction process [GO:0055114]	oxidation-reduction process [GO:0055114]	other membranes	integral component of membrane [GO:0016021]	integral component of membrane [GO:0016021]	other molecular function		other molecular function	integral component of membrane [GO:0016021];oxidation-reduction process [GO:0055114]	6	2	402	43.9	9.2
1.46501	0.0342761	2.34359	Q70MR6	Ornithine decarboxylase	other metabolic processes	putrescine biosynthetic process from ornithine [GO:0033387]	putrescine biosynthetic process from ornithine [GO:0033387]	other cell component	cytoplasm [GO:0005737]	cytoplasm [GO:0005737]	other molecular function	ornithine decarboxylase activity [GO:0004586]	ornithine decarboxylase activity [GO:0004586]	cytoplasm [GO:0005737];ornithine decarboxylase activity [GO:0004586];putrescine biosynthetic process from ornithine [GO:0033387]	21	4	434	46.4	5.49
1.60707	0.0247135	2.33438	A0A0R0KP75	Uncharacterized protein			NA			NA			NA		14	2	295	32.3	9.42
1.91766	0.0120877	2.30111	C6SVM8	Peptide-methionine (R)-S-oxide reductase	other metabolic processes;protein metabolism;stress response	protein repair [GO:0030091];response to oxidative stress [GO:0006979]	stress response			NA	other molecular function	metal ion binding [GO:0046872];peptide-methionine (R)-S-oxide reductase activity [GO:0033743]	metal ion binding [GO:0046872]	metal ion binding [GO:0046872];peptide-methionine (R)-S-oxide reductase activity [GO:0033743];protein repair [GO:0030091];response to oxidative stress [GO:0006979]	27	2	138	15.1	7.31
2.10476	0.00785669	2.27436	A0A0R0EF73	Uncharacterized protein	transport		transport			NA			NA		3	5	1652	183.5	6.18
3.9642	0.000108593	2.26629	C6T5C6	AAI domain-containing protein			NA			NA			NA		53	4	127	13.2	8.06
1.54014	0.0288308	2.25116	I1LPH2	Aminoacyl-tRNA hydrolase			NA	cytosol;mitochondrion	cytosol [GO:0005829];mitochondrion [GO:0005739]	cytosol	other molecular function	aminoacyl-tRNA hydrolase activity [GO:0004045]	aminoacyl-tRNA hydrolase activity [GO:0004045]	aminoacyl-tRNA hydrolase activity [GO:0004045];cytosol [GO:0005829];mitochondrion [GO:0005739]	27	3	189	21	9.23
1.3012	0.0499802	2.23378	I1KHK4	Protein kinase domain-containing protein	other metabolic processes;protein metabolism	protein phosphorylation [GO:0006468]	protein metabolism	other membranes;plasma membrane	integral component of membrane [GO:0016021];plasma membrane [GO:0005886]	plasma membrane	kinase activity;other molecular function	ATP binding [GO:0005524];transmembrane receptor protein serine/threonine kinase activity [GO:0004675]	ATP binding [GO:0005524]	ATP binding [GO:0005524];integral component of membrane [GO:0016021];plasma membrane [GO:0005886];protein phosphorylation [GO:0006468];transmembrane receptor protein serine/threonine kinase activity [GO:0004675]	14	5	713	77.5	6.2
2.03729	0.00917726	2.18795	K7N3G6	Amine oxidase	other metabolic processes	amine metabolic process [GO:0009308]	amine metabolic process [GO:0009308]			NA	other molecular function	copper ion binding [GO:0005507];primary amine oxidase activity [GO:0008131];quinone binding [GO:0048038]	copper ion binding [GO:0005507]	amine metabolic process [GO:0009308];copper ion binding [GO:0005507];primary amine oxidase activity [GO:0008131];quinone binding [GO:0048038]	8	3	675	75.9	7.14
4.62705	2.36022e-05	2.18681	I1L5J4	Uncharacterized protein	transport		transport	other membranes;plasma membrane	integral component of membrane [GO:0016021];plasma membrane [GO:0005886]	plasma membrane	transporter activity	nucleoside transmembrane transporter activity [GO:0005337]	transporter activity	integral component of membrane [GO:0016021];nucleoside transmembrane transporter activity [GO:0005337];plasma membrane [GO:0005886]	7	3	414	45.5	8.72
3.26361	0.000544989	2.18256	A0A0R0GWL6	Peroxidase	other biological processes;other metabolic processes;stress response	hydrogen peroxide catabolic process [GO:0042744];response to oxidative stress [GO:0006979]	stress response	non-structural extracellular;other cell component	extracellular region [GO:0005576];plant-type cell wall [GO:0009505];plasmodesma [GO:0009506]	non-structural extracellular	other molecular function	heme binding [GO:0020037];metal ion binding [GO:0046872];peroxidase activity [GO:0004601]	heme binding [GO:0020037]	extracellular region [GO:0005576];heme binding [GO:0020037];hydrogen peroxide catabolic process [GO:0042744];metal ion binding [GO:0046872];peroxidase activity [GO:0004601];plant-type cell wall [GO:0009505];plasmodesma [GO:0009506];response to oxidative stress [GO:0006979]	39	8	326	35.6	8.07
1.60521	0.0248191	2.16078	A0A0R0KM06	Peroxidase	other biological processes;other metabolic processes;stress response	hydrogen peroxide catabolic process [GO:0042744];response to oxidative stress [GO:0006979]	stress response	non-structural extracellular;other cell component	extracellular region [GO:0005576]	non-structural extracellular	other molecular function	heme binding [GO:0020037];metal ion binding [GO:0046872];peroxidase activity [GO:0004601]	heme binding [GO:0020037]	extracellular region [GO:0005576];heme binding [GO:0020037];hydrogen peroxide catabolic process [GO:0042744];metal ion binding [GO:0046872];peroxidase activity [GO:0004601];response to oxidative stress [GO:0006979]	36	8	324	35.5	8.12
1.65038	0.0223674	2.14621	K7MRT1	Uncharacterized protein			NA	other membranes	integral component of membrane [GO:0016021]	integral component of membrane [GO:0016021]			NA	integral component of membrane [GO:0016021]	5	2	531	60.5	5.22
2.62042	0.00239651	2.13872	K7LBF4	Uncharacterized protein	other metabolic processes	glucan catabolic process [GO:0009251]	glucan catabolic process [GO:0009251]	non-structural extracellular;other membranes	integral component of membrane [GO:0016021]	non-structural extracellular	other molecular function	beta-glucosidase activity [GO:0008422]	beta-glucosidase activity [GO:0008422]	beta-glucosidase activity [GO:0008422];glucan catabolic process [GO:0009251];integral component of membrane [GO:0016021]	9	4	662	72.2	6.48
1.61518	0.0242562	2.13735	C6TJ04	Inositol oxygenase	other metabolic processes	inositol catabolic process [GO:0019310]	inositol catabolic process [GO:0019310]	other cell component	cytoplasm [GO:0005737]	cytoplasm [GO:0005737]	other molecular function	inositol oxygenase activity [GO:0050113];iron ion binding [GO:0005506]	iron ion binding [GO:0005506]	cytoplasm [GO:0005737];inositol catabolic process [GO:0019310];inositol oxygenase activity [GO:0050113];iron ion binding [GO:0005506]	24	2	312	36.2	4.97
1.30526	0.0495151	2.13134	I1MCU4	Malic enzyme	other metabolic processes	malate metabolic process [GO:0006108];pyruvate metabolic process [GO:0006090]	malate metabolic process [GO:0006108]	other cell component	chloroplast [GO:0009507]	chloroplast [GO:0009507]	other molecular function	malate dehydrogenase (decarboxylating) (NAD+) activity [GO:0004471];malate dehydrogenase (decarboxylating) (NADP+) activity [GO:0004473];malic enzyme activity [GO:0004470];metal ion binding [GO:0046872];NAD binding [GO:0051287]	malic enzyme activity [GO:0004470]	chloroplast [GO:0009507];malate dehydrogenase (decarboxylating) (NAD+) activity [GO:0004471];malate dehydrogenase (decarboxylating) (NADP+) activity [GO:0004473];malate metabolic process [GO:0006108];malic enzyme activity [GO:0004470];metal ion binding [GO:0046872];NAD binding [GO:0051287];pyruvate metabolic process [GO:0006090]	34	12	643	71.1	7.53
1.34271	0.0454242	2.09663	D4N5G0	Alpha-form rubisco activase			NA	other cell component	chloroplast stroma [GO:0009570];thylakoid [GO:0009579]	chloroplast	enzyme regulator activity;other molecular function	ATP binding [GO:0005524];ribulose-1,5-bisphosphate carboxylase/oxygenase activator activity [GO:0046863]	ATP binding [GO:0005524]	ATP binding [GO:0005524];chloroplast stroma [GO:0009570];ribulose-1,5-bisphosphate carboxylase/oxygenase activator activity [GO:0046863];thylakoid [GO:0009579]	7	2	478	52.2	6.25
1.39672	0.0401124	2.07085	I1L819	Glutathione peroxidase	other biological processes;stress response	response to oxidative stress [GO:0006979]	stress response	cytosol		cytosol	other molecular function	glutathione peroxidase activity [GO:0004602];peroxidase activity [GO:0004601]	glutathione peroxidase activity [GO:0004602]	glutathione peroxidase activity [GO:0004602];peroxidase activity [GO:0004601];response to oxidative stress [GO:0006979]	22	4	170	19	9.45
2.83557	0.00146026	2.04555	P10743	Stem 31 kDa glycoprotein			NA			NA	other molecular function	nutrient reservoir activity [GO:0045735]	nutrient reservoir activity [GO:0045735]	nutrient reservoir activity [GO:0045735]	61	14	254	29.3	7.21
3.18263	0.000656697	2.01754	I1KMB5	Uncharacterized protein	other biological processes;other metabolic processes;RNA metabolism OR transcription	alternative mRNA splicing, via spliceosome [GO:0000380];DNA repair [GO:0006281];regulation of alternative mRNA splicing, via spliceosome [GO:0000381]	RNA metabolism OR transcription	other cell component		other cell component	nucleic acid binding activity	RNA binding [GO:0003723]	RNA binding [GO:0003723]	alternative mRNA splicing, via spliceosome [GO:0000380];DNA repair [GO:0006281];regulation of alternative mRNA splicing, via spliceosome [GO:0000381];RNA binding [GO:0003723]	9	2	384	42.3	5.64
2.00875	0.00980064	2.00997	I1KTE1	Cellulose synthase	cell cycle OR cell proliferation;cell organization and biogenesis;other metabolic processes	cell wall organization [GO:0071555];cellulose biosynthetic process [GO:0030244];plant-type primary cell wall biogenesis [GO:0009833]	cell wall organization [GO:0071555]	ER/Golgi;other membranes;plasma membrane	Golgi apparatus [GO:0005794];integral component of membrane [GO:0016021];plasma membrane [GO:0005886];trans-Golgi network [GO:0005802]	ER/Golgi	other molecular function	cellulose synthase (UDP-forming) activity [GO:0016760];cellulose synthase activity [GO:0016759];metal ion binding [GO:0046872]	metal ion binding [GO:0046872]	cell wall organization [GO:0071555];cellulose biosynthetic process [GO:0030244];cellulose synthase (UDP-forming) activity [GO:0016760];cellulose synthase activity [GO:0016759];Golgi apparatus [GO:0005794];integral component of membrane [GO:0016021];metal ion binding [GO:0046872];plant-type primary cell wall biogenesis [GO:0009833];plasma membrane [GO:0005886];trans-Golgi network [GO:0005802]	8	5	1097	123.9	6.93
2.97215	0.00106622	1.98783	I1M679	Peptidase S59 domain-containing protein	developmental processes;other biological processes;signal transduction;transport	defense response signaling pathway, resistance gene-dependent [GO:0009870];posttranscriptional tethering of RNA polymerase II gene DNA at nuclear periphery [GO:0000973];protein import into nucleus [GO:0006606];response to auxin [GO:0009733];RNA export from nucleus [GO:0006405];telomere tethering at nuclear periphery [GO:0034398]	signal transduction	nucleus;other membranes	nuclear membrane [GO:0031965];nuclear pore cytoplasmic filaments [GO:0044614]	nucleus	other molecular function	nuclear localization sequence binding [GO:0008139];RNA binding [GO:0003723];structural constituent of nuclear pore [GO:0017056]	RNA binding [GO:0003723]	defense response signaling pathway, resistance gene-dependent [GO:0009870];nuclear localization sequence binding [GO:0008139];nuclear membrane [GO:0031965];nuclear pore cytoplasmic filaments [GO:0044614];posttranscriptional tethering of RNA polymerase II gene DNA at nuclear periphery [GO:0000973];protein import into nucleus [GO:0006606];response to auxin [GO:0009733];RNA binding [GO:0003723];RNA …	3	2	1022	116.1	5.54
1.61468	0.024284	1.94054	K7K5F4	Uncharacterized protein	cell cycle OR cell proliferation;other metabolic processes	cell wall organization [GO:0071555];cellulose biosynthetic process [GO:0030244];plant-type primary cell wall biogenesis [GO:0009833]	cell cycle OR cell proliferation	ER/Golgi;other membranes;plasma membrane	Golgi apparatus [GO:0005794];integral component of membrane [GO:0016021];plasma membrane [GO:0005886];trans-Golgi network [GO:0005802]	ER/Golgi	other molecular function	cellulose synthase (UDP-forming) activity [GO:0016760];mannan synthase activity [GO:0051753]	cellulose synthase activity	cell wall organization [GO:0071555];cellulose biosynthetic process [GO:0030244];cellulose synthase (UDP-forming) activity [GO:0016760];Golgi apparatus [GO:0005794];integral component of membrane [GO:0016021];mannan synthase activity [GO:0051753];plant-type primary cell wall biogenesis [GO:0009833];plasma membrane [GO:0005886];trans-Golgi network [GO:0005802]	5	3	1143	128.2	7.33
3.45226	0.000352973	1.93598	I1M6D0	Uncharacterized protein	other metabolic processes	raffinose family oligosaccharide biosynthetic process [GO:0010325]	raffinose family oligosaccharide biosynthetic process [GO:0010325]			NA	other molecular function	catalytic activity [GO:0003824]	catalytic activity [GO:0003824]	catalytic activity [GO:0003824];raffinose family oligosaccharide biosynthetic process [GO:0010325]	17	11	755	83.1	6.14
1.72719	0.0187418	1.92947	I1LL66	Uncharacterized protein			NA			NA			NA		7	2	403	45.2	8.16
1.66368	0.0216929	1.91568	K7MH28	Uncharacterized protein	other metabolic processes	lignin biosynthetic process [GO:0009809]	lignin biosynthetic process [GO:0009809]		membrane [GO:0016020]	membrane [GO:0016020]	other molecular function	heme binding [GO:0020037];iron ion binding [GO:0005506];oxidoreductase activity, acting on paired donors, with incorporation or reduction of molecular oxygen, NAD(P)H as one donor, and incorporation of one atom of oxygen [GO:0016709]	heme binding [GO:0020037]	heme binding [GO:0020037];iron ion binding [GO:0005506];lignin biosynthetic process [GO:0009809];membrane [GO:0016020];oxidoreductase activity, acting on paired donors, with incorporation or reduction of molecular oxygen, NAD(P)H as one donor, and incorporation of one atom of oxygen [GO:0016709]	20	6	518	58.3	6.49
2.41855	0.00381458	1.89941	I1LS52	Uncharacterized protein	other biological processes	negative regulation of phosphatase activity [GO:0010923];negative regulation of transcription by RNA polymerase II [GO:0000122];protein folding [GO:0006457]	protein folding [GO:0006457]	other cell component	prefoldin complex [GO:0016272]	prefoldin complex [GO:0016272]	enzyme regulator activity;other molecular function	chromatin binding [GO:0003682];phosphatase inhibitor activity [GO:0019212];transcription corepressor activity [GO:0003714];unfolded protein binding [GO:0051082]	chromatin binding [GO:0003682]	chromatin binding [GO:0003682];negative regulation of phosphatase activity [GO:0010923];negative regulation of transcription by RNA polymerase II [GO:0000122];phosphatase inhibitor activity [GO:0019212];prefoldin complex [GO:0016272];protein folding [GO:0006457];transcription corepressor activity [GO:0003714];unfolded protein binding [GO:0051082]	14	3	374	41.9	5.17
1.58166	0.0262023	1.89696	C6T2F7	Uncharacterized protein			NA			NA			NA		21	2	160	17.3	5.06
1.4346	0.0367617	1.89548	K7L6U2	ANK_REP_REGION domain-containing protein			NA			NA			NA		43	3	134	14.2	4.6
1.45203	0.035316	1.88037	I1N4Z6	Glyco_hydro_19_cat domain-containing protein	other metabolic processes;stress response	carbohydrate metabolic process [GO:0005975];cell wall macromolecule catabolic process [GO:0016998];chitin catabolic process [GO:0006032]	stress response			NA	other molecular function	chitinase activity [GO:0004568];polysaccharide binding [GO:0030247]	chitinase activity [GO:0004568]	carbohydrate metabolic process [GO:0005975];cell wall macromolecule catabolic process [GO:0016998];chitin catabolic process [GO:0006032];chitinase activity [GO:0004568];polysaccharide binding [GO:0030247]	10	2	329	36.4	6.37
1.73096	0.0185797	1.87863	I1K7G0	Methyltransferase	other metabolic processes	steroid biosynthetic process [GO:0006694]	steroid biosynthetic process [GO:0006694]			NA	other molecular function	methyltransferase activity [GO:0008168]	methyltransferase activity [GO:0008168]	methyltransferase activity [GO:0008168];steroid biosynthetic process [GO:0006694]	41	12	363	40.4	6.74
2.27278	0.00533602	1.80532	I1MHN0	CMP/dCMP-type deaminase domain-containing protein			NA			NA	other molecular function	hydrolase activity [GO:0016787];zinc ion binding [GO:0008270]	zinc ion binding [GO:0008270]	hydrolase activity [GO:0016787];zinc ion binding [GO:0008270]	8	2	181	20	6.67
1.67642	0.0210657	1.77119	A0A0R0E900	Pectin acetylesterase	cell organization and biogenesis	cell wall organization [GO:0071555]	cell organization and biogenesis	non-structural extracellular;other cell component	cell wall [GO:0005618];extracellular region [GO:0005576]	non-structural extracellular	other molecular function	hydrolase activity [GO:0016787]	hydrolase activity [GO:0016787]	cell wall [GO:0005618];cell wall organization [GO:0071555];extracellular region [GO:0005576];hydrolase activity [GO:0016787]	19	4	298	33.3	7.77
4.16332	6.86562e-05	1.76486	C6TJM1	Fructose-bisphosphate aldolase	other metabolic processes	glycolytic process [GO:0006096]	glycolytic process [GO:0006096]			NA	other molecular function	fructose-bisphosphate aldolase activity [GO:0004332]	fructose-bisphosphate aldolase activity [GO:0004332]	fructose-bisphosphate aldolase activity [GO:0004332];glycolytic process [GO:0006096]	30	7	358	38.5	7.68
2.09369	0.0080595	1.71752	C6T3S4	Ribonuclease T(2)	other metabolic processes;RNA metabolism OR transcription	RNA catabolic process [GO:0006401]	RNA metabolism OR transcription	non-structural extracellular	extracellular region [GO:0005576]	non-structural extracellular	nucleic acid binding activity;other molecular function	endoribonuclease activity [GO:0004521];ribonuclease T2 activity [GO:0033897];RNA binding [GO:0003723]	RNA binding [GO:0003723]	endoribonuclease activity [GO:0004521];extracellular region [GO:0005576];ribonuclease T2 activity [GO:0033897];RNA binding [GO:0003723];RNA catabolic process [GO:0006401]	15	2	238	26.8	6.86
2.2884	0.00514748	1.71433	I1JDD7	Cellulose synthase	cell cycle OR cell proliferation;cell organization and biogenesis;other metabolic processes	cell wall organization [GO:0071555];cellulose biosynthetic process [GO:0030244];plant-type primary cell wall biogenesis [GO:0009833]	cell wall organization [GO:0071555]	ER/Golgi;other membranes;plasma membrane	Golgi apparatus [GO:0005794];integral component of membrane [GO:0016021];plasma membrane [GO:0005886];trans-Golgi network [GO:0005802]	ER/Golgi	other molecular function	cellulose synthase (UDP-forming) activity [GO:0016760];cellulose synthase activity [GO:0016759];metal ion binding [GO:0046872]	metal ion binding [GO:0046872]	cell wall organization [GO:0071555];cellulose biosynthetic process [GO:0030244];cellulose synthase (UDP-forming) activity [GO:0016760];cellulose synthase activity [GO:0016759];Golgi apparatus [GO:0005794];integral component of membrane [GO:0016021];metal ion binding [GO:0046872];plant-type primary cell wall biogenesis [GO:0009833];plasma membrane [GO:0005886];trans-Golgi network [GO:0005802]	8	6	1078	121.4	7.18
2.17008	0.00675961	1.71095	I1LXL0	Uncharacterized protein		endoplasmic reticulum to Golgi vesicle-mediated transport [GO:0006888];retrograde vesicle-mediated transport, Golgi to endoplasmic reticulum [GO:0006890]	transport	ER/Golgi;other cell component;other membranes	COPII-coated ER to Golgi transport vesicle [GO:0030134];endoplasmic reticulum [GO:0005783];integral component of membrane [GO:0016021]	ER/Golgi			NA	COPII-coated ER to Golgi transport vesicle [GO:0030134];endoplasmic reticulum [GO:0005783];endoplasmic reticulum to Golgi vesicle-mediated transport [GO:0006888];integral component of membrane [GO:0016021];retrograde vesicle-mediated transport, Golgi to endoplasmic reticulum [GO:0006890]	9	2	351	40.3	6.89
1.35341	0.0443195	1.70435	A0A0R0HFH0	Protein kinase domain-containing protein	other metabolic processes;protein metabolism		protein metabolism	other membranes	integral component of membrane [GO:0016021]	integral component of membrane [GO:0016021]	kinase activity;other molecular function	ATP binding [GO:0005524];protein kinase activity [GO:0004672]	ATP binding [GO:0005524]	ATP binding [GO:0005524];integral component of membrane [GO:0016021];protein kinase activity [GO:0004672]	6	3	544	59.4	6.29
2.4128	0.00386544	1.68528	Q06765	ADR6 protein			NA			NA			NA		51	7	272	30.4	6.84
3.34795	0.000448802	1.66066	I1KNV8	Uncharacterized protein	other metabolic processes		other metabolic processes	ER/Golgi;other cell component;other cytoplasmic organelle;other membranes	endosome [GO:0005768];integral component of membrane [GO:0016021];trans-Golgi network [GO:0005802]	ER/Golgi	other molecular function	methyltransferase activity [GO:0008168]	methyltransferase activity [GO:0008168]	endosome [GO:0005768];integral component of membrane [GO:0016021];methyltransferase activity [GO:0008168];trans-Golgi network [GO:0005802]	17	10	842	95.1	5.14
1.40087	0.0397314	1.63322	A0A0R0EAZ4	Uncharacterized protein	other metabolic processes;protein metabolism		protein metabolism	other membranes;plasma membrane	integral component of membrane [GO:0016021]	plasma membrane	kinase activity;other molecular function	ATP binding [GO:0005524];protein kinase activity [GO:0004672]	ATP binding [GO:0005524]	ATP binding [GO:0005524];integral component of membrane [GO:0016021];protein kinase activity [GO:0004672]	7	3	733	82.8	6.87
3.4604	0.000346418	1.59956	A0A0R0I796	Nudix hydrolase domain-containing protein	other metabolic processes		other metabolic processes	other cell component		other cell component	other molecular function	hydrolase activity [GO:0016787]	hydrolase activity [GO:0016787]	hydrolase activity [GO:0016787]	20	2	178	20.5	5.71
1.79542	0.0160169	1.58519	I1LU76	Peroxidase	other biological processes;other metabolic processes;stress response	hydrogen peroxide catabolic process [GO:0042744];response to oxidative stress [GO:0006979]	stress response	non-structural extracellular;other cell component	extracellular region [GO:0005576];plant-type cell wall [GO:0009505];plasmodesma [GO:0009506]	non-structural extracellular	other molecular function	heme binding [GO:0020037];metal ion binding [GO:0046872];peroxidase activity [GO:0004601]	heme binding [GO:0020037]	extracellular region [GO:0005576];heme binding [GO:0020037];hydrogen peroxide catabolic process [GO:0042744];metal ion binding [GO:0046872];peroxidase activity [GO:0004601];plant-type cell wall [GO:0009505];plasmodesma [GO:0009506];response to oxidative stress [GO:0006979]	32	7	326	35.8	8.22
1.70765	0.0196041	1.55372	I1KRR5	Uncharacterized protein	other metabolic processes;RNA metabolism OR transcription		RNA metabolism OR transcription			NA	nucleic acid binding activity;other molecular function		nucleic acid binding activity		8	3	683	73.4	7.53
3.19192	0.000642807	1.52924	A0A368UJK6	Uncharacterized protein			NA	other cell component;other membranes;plasma membrane		plasma membrane			NA		7	4	1141	125.3	5.26
2.9685	0.00107523	1.5248	K7MUD6	Uncharacterized protein			NA			NA			NA		5	3	991	109.2	5.71
3.79511	0.000160285	1.52042	Q2V732	VHS and GAT domain protein	other metabolic processes;protein metabolism;transport	intracellular protein transport [GO:0006886]	transport		cell [GO:0005623]	cell [GO:0005623]	other molecular function		other molecular function	cell [GO:0005623];intracellular protein transport [GO:0006886]	15	5	672	72.9	5.68
1.35499	0.0441581	1.51944	I1K7B7	Uncharacterized protein	transport		transport			NA	other molecular function	calcium ion binding [GO:0005509]	calcium ion binding [GO:0005509]	calcium ion binding [GO:0005509]	13	10	1076	117	5.39
3.06224	0.000866478	1.51912	I1L5M4	Uncharacterized protein			NA			NA			NA		6	2	367	40.2	8.54
4.28235	5.21978e-05	1.49796	I1J5R4	Ribonuclease T(2)	other metabolic processes;RNA metabolism OR transcription	RNA catabolic process [GO:0006401]	RNA metabolism OR transcription	non-structural extracellular	extracellular region [GO:0005576]	non-structural extracellular	nucleic acid binding activity;other molecular function	endoribonuclease activity [GO:0004521];ribonuclease T2 activity [GO:0033897];RNA binding [GO:0003723]	RNA binding [GO:0003723]	endoribonuclease activity [GO:0004521];extracellular region [GO:0005576];ribonuclease T2 activity [GO:0033897];RNA binding [GO:0003723];RNA catabolic process [GO:0006401]	39	5	226	25.9	5.07
1.53805	0.0289701	1.48819	I1K629	Uncharacterized protein	other metabolic processes		other metabolic processes			NA	other molecular function	O-methyltransferase activity [GO:0008171]	O-methyltransferase activity [GO:0008171]	O-methyltransferase activity [GO:0008171]	10	2	250	28.1	6.55
1.84358	0.0143357	1.48112	A0A0R0GI14	Uncharacterized protein	other metabolic processes;protein metabolism		protein metabolism			NA	other molecular function	peptidase activity [GO:0008233]	peptidase activity [GO:0008233]	peptidase activity [GO:0008233]	18	3	370	41.3	4.86
1.84135	0.0144095	1.42537	C6TGX7	Uncharacterized protein			NA			NA	other molecular function	nutrient reservoir activity [GO:0045735]	nutrient reservoir activity [GO:0045735]	nutrient reservoir activity [GO:0045735]	32	8	254	29	8.63
2.45322	0.00352188	1.42205	I1L7Y6	U1 small nuclear ribonucleoprotein C	cell organization and biogenesis;other metabolic processes;RNA metabolism OR transcription	mRNA 5'-splice site recognition [GO:0000395];spliceosomal snRNP assembly [GO:0000387]	cell organization and biogenesis	nucleus	commitment complex [GO:0000243];U1 snRNP [GO:0005685];U2-type prespliceosome [GO:0071004]	nucleus	nucleic acid binding activity;other molecular function	mRNA binding [GO:0003729];pre-mRNA 5'-splice site binding [GO:0030627];U1 snRNA binding [GO:0030619];zinc ion binding [GO:0008270]	mRNA binding [GO:0003729]	commitment complex [GO:0000243];mRNA 5'-splice site recognition [GO:0000395];mRNA binding [GO:0003729];pre-mRNA 5'-splice site binding [GO:0030627];spliceosomal snRNP assembly [GO:0000387];U1 snRNA binding [GO:0030619];U1 snRNP [GO:0005685];U2-type prespliceosome [GO:0071004];zinc ion binding [GO:0008270]	17	2	206	22.2	9.03
2.33496	0.00462423	1.41726	I1KQM2	Protein kinase domain-containing protein	other metabolic processes;protein metabolism		protein metabolism	other membranes	integral component of membrane [GO:0016021]	integral component of membrane [GO:0016021]	kinase activity;other molecular function	ATP binding [GO:0005524];protein kinase activity [GO:0004672]	ATP binding [GO:0005524]	ATP binding [GO:0005524];integral component of membrane [GO:0016021];protein kinase activity [GO:0004672]	19	8	649	70.3	6.49
2.57642	0.00265206	1.41467	I1K557	Uncharacterized protein	other metabolic processes;protein metabolism;signal transduction	abscisic acid-activated signaling pathway [GO:0009738];intracellular signal transduction [GO:0035556];peptidyl-serine phosphorylation [GO:0018105];protein autophosphorylation [GO:0046777]	protein metabolism	nucleus;other cell component	cytoplasm [GO:0005737];nucleus [GO:0005634]	nucleus	kinase activity;other molecular function	ATP binding [GO:0005524];calcium ion binding [GO:0005509];calcium-dependent protein serine/threonine kinase activity [GO:0009931];calmodulin binding [GO:0005516];calmodulin-dependent protein kinase activity [GO:0004683]	ATP binding [GO:0005524]	abscisic acid-activated signaling pathway [GO:0009738];ATP binding [GO:0005524];calcium ion binding [GO:0005509];calcium-dependent protein serine/threonine kinase activity [GO:0009931];calmodulin binding [GO:0005516];calmodulin-dependent protein kinase activity [GO:0004683];cytoplasm [GO:0005737];intracellular signal transduction [GO:0035556];nucleus [GO:0005634];peptidyl-serine phosphorylation […	16	5	507	57	5.44
1.85862	0.0138479	1.41253	I1M8S3	Uncharacterized protein	protein metabolism		protein metabolism			NA	other molecular function	serine-type endopeptidase activity [GO:0004252]	serine-type endopeptidase activity [GO:0004252]	serine-type endopeptidase activity [GO:0004252]	32	14	774	82.1	7.39
4.84994	1.41274e-05	1.35554	A0A0R0J895	Terpene cyclase/mutase family member	other metabolic processes	triterpenoid biosynthetic process [GO:0016104]	triterpenoid biosynthetic process [GO:0016104]	other cell component	lipid droplet [GO:0005811]	lipid droplet [GO:0005811]	other molecular function	beta-amyrin synthase activity [GO:0042300];lanosterol synthase activity [GO:0000250]	NA	beta-amyrin synthase activity [GO:0042300];lanosterol synthase activity [GO:0000250];lipid droplet [GO:0005811];triterpenoid biosynthetic process [GO:0016104]	13	7	762	87.5	6.76
1.86532	0.0136358	1.3531	I1K1C8	3-ketoacyl-CoA synthase	other metabolic processes	fatty acid biosynthetic process [GO:0006633]	fatty acid biosynthetic process [GO:0006633]	other membranes	integral component of membrane [GO:0016021]	integral component of membrane [GO:0016021]	other molecular function	transferase activity, transferring acyl groups other than amino-acyl groups [GO:0016747]	transferase activity	fatty acid biosynthetic process [GO:0006633];integral component of membrane [GO:0016021];transferase activity, transferring acyl groups other than amino-acyl groups [GO:0016747]	8	4	510	57.3	9.1
2.86191	0.00137433	1.34861	I1L7Z5	Peroxidase	other biological processes;other metabolic processes;stress response	hydrogen peroxide catabolic process [GO:0042744];response to oxidative stress [GO:0006979]	stress response	non-structural extracellular;other cell component	extracellular region [GO:0005576];plant-type cell wall [GO:0009505];plasmodesma [GO:0009506]	non-structural extracellular	other molecular function	heme binding [GO:0020037];metal ion binding [GO:0046872];peroxidase activity [GO:0004601]	heme binding [GO:0020037]	extracellular region [GO:0005576];heme binding [GO:0020037];hydrogen peroxide catabolic process [GO:0042744];metal ion binding [GO:0046872];peroxidase activity [GO:0004601];plant-type cell wall [GO:0009505];plasmodesma [GO:0009506];response to oxidative stress [GO:0006979]	41	8	322	35.1	6.3
4.84984	1.41305e-05	1.34054	C6SYE7	Bet_v_1 domain-containing protein	stress response	defense response [GO:0006952]	stress response			NA			NA	defense response [GO:0006952]	55	6	152	17.6	6.52
2.41382	0.00385634	1.33223	I1L9G9	Uncharacterized protein	other metabolic processes;protein metabolism	translation [GO:0006412]	protein metabolism	translational apparatus	ribosome [GO:0005840]	translational apparatus	other molecular function	structural constituent of ribosome [GO:0003735]	structural constituent of ribosome [GO:0003735]	ribosome [GO:0005840];structural constituent of ribosome [GO:0003735];translation [GO:0006412]	53	7	139	15.8	10.23
1.43981	0.0363233	1.33182	K7MNY0	Beta-galactosidase	other metabolic processes	carbohydrate metabolic process [GO:0005975]	carbohydrate metabolic process [GO:0005975]	non-structural extracellular		non-structural extracellular	other molecular function	beta-galactosidase activity [GO:0004565]	beta-galactosidase activity [GO:0004565]	beta-galactosidase activity [GO:0004565];carbohydrate metabolic process [GO:0005975]	14	6	722	80.9	8.1
1.3495	0.0447198	1.33129	I1J9E6	Uncharacterized protein	other biological processes;other metabolic processes;protein metabolism	protein folding [GO:0006457];protein peptidyl-prolyl isomerization [GO:0000413];protein polyubiquitination [GO:0000209]	protein metabolism	nucleus	nucleus [GO:0005634]	nucleus	other molecular function	peptidyl-prolyl cis-trans isomerase activity [GO:0003755];ubiquitin-ubiquitin ligase activity [GO:0034450]	ubiquitin ligase activity	nucleus [GO:0005634];peptidyl-prolyl cis-trans isomerase activity [GO:0003755];protein folding [GO:0006457];protein peptidyl-prolyl isomerization [GO:0000413];protein polyubiquitination [GO:0000209];ubiquitin-ubiquitin ligase activity [GO:0034450]	4	2	597	65.2	8.06
2.62527	0.00236992	1.32457	I1MYV1	C2 domain-containing protein	other biological processes		other biological processes	other cell component		other cell component	cytoskeletal activity		cytoskeletal activity		24	32	2134	228.5	5.5
3.24689	0.000566379	1.31524	I1N0W2	NAD(P)-bd_dom domain-containing protein	other metabolic processes	nucleotide-sugar metabolic process [GO:0009225]	nucleotide-sugar metabolic process [GO:0009225]			NA	other molecular function	dTDP-glucose 4,6-dehydratase activity [GO:0008460]	dTDP-glucose 4,6-dehydratase activity [GO:0008460]	dTDP-glucose 4,6-dehydratase activity [GO:0008460];nucleotide-sugar metabolic process [GO:0009225]	29	10	594	66.6	7.09
1.35661	0.0439936	1.31002	I1JUX8	Malic enzyme			NA			NA	other molecular function	malate dehydrogenase (decarboxylating) (NAD+) activity [GO:0004471];metal ion binding [GO:0046872];NAD binding [GO:0051287]	malate dehydrogenase activity	malate dehydrogenase (decarboxylating) (NAD+) activity [GO:0004471];metal ion binding [GO:0046872];NAD binding [GO:0051287]	39	16	588	64.8	6.8
3.30578	0.000494558	1.30172	K7N4X8	Phytocyanin domain-containing protein	other metabolic processes		other metabolic processes	other membranes;plasma membrane	anchored component of plasma membrane [GO:0046658]	plasma membrane	other molecular function	electron transfer activity [GO:0009055]	electron transfer activity [GO:0009055]	anchored component of plasma membrane [GO:0046658];electron transfer activity [GO:0009055]	18	2	195	21.5	7.46
2.70736	0.00196173	1.29858	K7MRH9	Methyltransferase	other metabolic processes		other metabolic processes	ER/Golgi;other cell component;other cytoplasmic organelle;other membranes	endosome [GO:0005768];Golgi apparatus [GO:0005794];integral component of membrane [GO:0016021];trans-Golgi network [GO:0005802]	Golgi apparatus [GO:0005794]	other molecular function	methyltransferase activity [GO:0008168]	methyltransferase activity [GO:0008168]	endosome [GO:0005768];Golgi apparatus [GO:0005794];integral component of membrane [GO:0016021];methyltransferase activity [GO:0008168];trans-Golgi network [GO:0005802]	16	8	608	68.7	7.81
1.30246	0.0498361	1.29297	A0A0R0ES83	AAA domain-containing protein	other biological processes		other biological processes	other cell component		other cell component	other molecular function	ATP binding [GO:0005524]	ATP binding [GO:0005524]	ATP binding [GO:0005524]	35	8	332	37.5	6.57
4.06198	8.66995e-05	1.28898	K7KPK3	Uncharacterized protein			NA	other membranes	integral component of membrane [GO:0016021]	integral component of membrane [GO:0016021]			NA	integral component of membrane [GO:0016021]	37	15	655	73	4.3
3.79078	0.00016189	1.28483	A0A0R0IXC2	Uncharacterized protein			NA	other membranes	integral component of membrane [GO:0016021]	integral component of membrane [GO:0016021]	other molecular function	heme binding [GO:0020037];iron ion binding [GO:0005506];monooxygenase activity [GO:0004497];oxidoreductase activity, acting on paired donors, with incorporation or reduction of molecular oxygen [GO:0016705]	heme binding [GO:0020037]	heme binding [GO:0020037];integral component of membrane [GO:0016021];iron ion binding [GO:0005506];monooxygenase activity [GO:0004497];oxidoreductase activity, acting on paired donors, with incorporation or reduction of molecular oxygen [GO:0016705]	33	13	513	58.2	8.47
1.36512	0.0431399	1.28347	I1L8K7	Arf-GAP domain-containing protein	transport		transport			NA	enzyme regulator activity	GTPase activator activity [GO:0005096];metal ion binding [GO:0046872]	metal ion binding [GO:0046872]	GTPase activator activity [GO:0005096];metal ion binding [GO:0046872]	10	4	479	53	7.5
1.77684	0.0167169	1.27933	I1K345	AAA domain-containing protein	cell organization and biogenesis	cytoplasmic microtubule organization [GO:0031122]	cell organization and biogenesis	nucleus	nucleus [GO:0005634]	nucleus	other molecular function	ATP binding [GO:0005524];ATPase activity [GO:0016887];microtubule-severing ATPase activity [GO:0008568]	ATP binding [GO:0005524]	ATP binding [GO:0005524];ATPase activity [GO:0016887];cytoplasmic microtubule organization [GO:0031122];microtubule-severing ATPase activity [GO:0008568];nucleus [GO:0005634]	15	4	403	45.3	6.48
4.37233	4.24302e-05	1.27436	I1LZN1	Transmembrane 9 superfamily member	other biological processes	protein localization to membrane [GO:0072657]	protein localization to membrane [GO:0072657]	ER/Golgi;other cytoplasmic organelle;other membranes	endosome [GO:0005768];Golgi apparatus [GO:0005794];integral component of membrane [GO:0016021];membrane [GO:0016020];trans-Golgi network [GO:0005802]	ER/Golgi			NA	endosome [GO:0005768];Golgi apparatus [GO:0005794];integral component of membrane [GO:0016021];membrane [GO:0016020];protein localization to membrane [GO:0072657];trans-Golgi network [GO:0005802]	14	8	682	77.5	6.96
4.76724	1.70906e-05	1.26958	I1KIC2	Protein kinase domain-containing protein	other metabolic processes;protein metabolism;signal transduction	brassinosteroid mediated signaling pathway [GO:0009742]	signal transduction	other membranes;plasma membrane		plasma membrane	kinase activity;other molecular function	ATP binding [GO:0005524];protein kinase activity [GO:0004672]	ATP binding [GO:0005524]	ATP binding [GO:0005524];brassinosteroid mediated signaling pathway [GO:0009742];protein kinase activity [GO:0004672]	13	5	491	55.2	6.1
3.49355	0.000320958	1.23518	K7L7J7	Lipoxygenase	other metabolic processes	oxylipin biosynthetic process [GO:0031408]	oxylipin biosynthetic process [GO:0031408]	other cell component		other cell component	other molecular function	metal ion binding [GO:0046872];oxidoreductase activity, acting on single donors with incorporation of molecular oxygen, incorporation of two atoms of oxygen [GO:0016702]	metal ion binding [GO:0046872]	metal ion binding [GO:0046872];oxidoreductase activity, acting on single donors with incorporation of molecular oxygen, incorporation of two atoms of oxygen [GO:0016702];oxylipin biosynthetic process [GO:0031408]	33	21	866	97.1	6.44
2.77248	0.00168856	1.22816	I1KGW2	Plasma membrane ATPase	other biological processes;transport	proton export across plasma membrane [GO:0120029];proton transmembrane transport [GO:1902600];regulation of intracellular pH [GO:0051453]	transport	other membranes;plasma membrane	integral component of membrane [GO:0016021];plasma membrane [GO:0005886]	plasma membrane	other molecular function;transporter activity	ATP binding [GO:0005524];proton-exporting ATPase activity, phosphorylative mechanism [GO:0008553]	ATP binding [GO:0005524]	ATP binding [GO:0005524];integral component of membrane [GO:0016021];plasma membrane [GO:0005886];proton export across plasma membrane [GO:0120029];proton transmembrane transport [GO:1902600];proton-exporting ATPase activity, phosphorylative mechanism [GO:0008553];regulation of intracellular pH [GO:0051453]	16	13	949	104.4	6.73
2.22674	0.00593285	1.19623	I1KHX8	Uncharacterized protein	transport		transport	other membranes	integral component of membrane [GO:0016021]	integral component of membrane [GO:0016021]		transmembrane transporter activity [GO:0022857]	transmembrane transporter activity [GO:0022857]	integral component of membrane [GO:0016021];transmembrane transporter activity [GO:0022857]	25	6	355	38.2	9.29
2.09852	0.00797048	1.19372	I1JG01	Peroxidase	other biological processes;other metabolic processes;stress response	hydrogen peroxide catabolic process [GO:0042744];response to oxidative stress [GO:0006979]	stress response	non-structural extracellular	extracellular region [GO:0005576]	non-structural extracellular	other molecular function	heme binding [GO:0020037];metal ion binding [GO:0046872];peroxidase activity [GO:0004601]	heme binding [GO:0020037]	extracellular region [GO:0005576];heme binding [GO:0020037];hydrogen peroxide catabolic process [GO:0042744];metal ion binding [GO:0046872];peroxidase activity [GO:0004601];response to oxidative stress [GO:0006979]	9	2	331	35	4.75
2.13471	0.00733315	1.18933	Q7XA50	Sorbitol-like transporter	transport		transport	other membranes	integral component of membrane [GO:0016021]	integral component of membrane [GO:0016021]	transporter activity	transmembrane transporter activity [GO:0022857]	transporter activity	integral component of membrane [GO:0016021];transmembrane transporter activity [GO:0022857]	6	2	523	56.5	9.23
2.32564	0.00472459	1.18612	I1K5C5	Uncharacterized protein	stress response	defense response [GO:0006952]	stress response	non-structural extracellular	extracellular region [GO:0005576]	non-structural extracellular			NA	defense response [GO:0006952];extracellular region [GO:0005576]	29	4	245	26.3	8.88
3.54592	0.0002845	1.17722	Q43440	Lipoxygenase	other metabolic processes	oxylipin biosynthetic process [GO:0031408]	oxylipin biosynthetic process [GO:0031408]	other cell component		other cell component	other molecular function	metal ion binding [GO:0046872];oxidoreductase activity, acting on single donors with incorporation of molecular oxygen, incorporation of two atoms of oxygen [GO:0016702]	metal ion binding [GO:0046872]	metal ion binding [GO:0046872];oxidoreductase activity, acting on single donors with incorporation of molecular oxygen, incorporation of two atoms of oxygen [GO:0016702];oxylipin biosynthetic process [GO:0031408]	53	33	859	96.2	6.77
1.97912	0.0104925	1.1724	I1L1H1	Amino_oxidase domain-containing protein			NA			NA	other molecular function	oxidoreductase activity [GO:0016491];polyamine oxidase activity [GO:0046592]	oxidoreductase activity [GO:0016491]	oxidoreductase activity [GO:0016491];polyamine oxidase activity [GO:0046592]	7	3	600	65.9	6.25
2.80907	0.00155213	1.1715	K7LCZ8	Cellulose synthase	cell cycle OR cell proliferation;cell organization and biogenesis;other metabolic processes	cell wall organization [GO:0071555];cellulose biosynthetic process [GO:0030244];plant-type primary cell wall biogenesis [GO:0009833]	cell wall organization [GO:0071555]	ER/Golgi;other membranes;plasma membrane	Golgi apparatus [GO:0005794];integral component of membrane [GO:0016021];plasma membrane [GO:0005886];trans-Golgi network [GO:0005802]	Golgi apparatus [GO:0005794]	other molecular function	cellulose synthase (UDP-forming) activity [GO:0016760];cellulose synthase activity [GO:0016759];metal ion binding [GO:0046872]	metal ion binding [GO:0046872]	cell wall organization [GO:0071555];cellulose biosynthetic process [GO:0030244];cellulose synthase (UDP-forming) activity [GO:0016760];cellulose synthase activity [GO:0016759];Golgi apparatus [GO:0005794];integral component of membrane [GO:0016021];metal ion binding [GO:0046872];plant-type primary cell wall biogenesis [GO:0009833];plasma membrane [GO:0005886];trans-Golgi network [GO:0005802]	18	12	1074	120.1	7.39
1.8862	0.0129956	1.15337	A0A0R0INL6	C3HC-type domain-containing protein			NA	nucleus	nucleus [GO:0005634]	nucleus	other molecular function	zinc ion binding [GO:0008270]	zinc ion binding [GO:0008270]	nucleus [GO:0005634];zinc ion binding [GO:0008270]	5	2	939	99.4	5.05
4.7836	1.6459e-05	1.13856	I1M5C1	LEA_2 domain-containing protein			NA	other membranes;plasma membrane	integral component of membrane [GO:0016021];plasma membrane [GO:0005886]	plasma membrane			NA	integral component of membrane [GO:0016021];plasma membrane [GO:0005886]	12	2	254	27.8	10.23
3.17018	0.000675803	1.13712	I1J9V8	Protein transport protein sec16	cell organization and biogenesis;other biological processes;other metabolic processes;transport	COPII vesicle coating [GO:0048208];endoplasmic reticulum organization [GO:0007029];Golgi organization [GO:0007030];positive regulation of protein exit from endoplasmic reticulum [GO:0070863];protein localization to endoplasmic reticulum exit site [GO:0070973];protein transport [GO:0015031]	cell organization and biogenesis	ER/Golgi;other membranes	endoplasmic reticulum exit site [GO:0070971];ER to Golgi transport vesicle membrane [GO:0012507];Golgi membrane [GO:0000139]	ER/Golgi			NA	COPII vesicle coating [GO:0048208];endoplasmic reticulum exit site [GO:0070971];endoplasmic reticulum organization [GO:0007029];ER to Golgi transport vesicle membrane [GO:0012507];Golgi membrane [GO:0000139];Golgi organization [GO:0007030];positive regulation of protein exit from endoplasmic reticulum [GO:0070863];protein localization to endoplasmic reticulum exit site [GO:0070973];protein transp…	6	5	1424	154.3	5.08
2.91586	0.00121378	1.13506	I1KKN0	Uncharacterized protein			NA	other membranes	integral component of membrane [GO:0016021]	integral component of membrane [GO:0016021]			NA	integral component of membrane [GO:0016021]	11	10	1296	140.7	4.55
2.26538	0.00542771	1.13449	I1KD34	COBRA-like protein	cell organization and biogenesis;other metabolic processes	cellulose microfibril organization [GO:0010215];plant-type cell wall biogenesis [GO:0009832];plant-type cell wall cellulose biosynthetic process [GO:0052324];plant-type cell wall organization [GO:0009664]	cell organization and biogenesis	other membranes;plasma membrane	anchored component of plasma membrane [GO:0046658];integral component of membrane [GO:0016021]	plasma membrane			NA	anchored component of plasma membrane [GO:0046658];cellulose microfibril organization [GO:0010215];integral component of membrane [GO:0016021];plant-type cell wall biogenesis [GO:0009832];plant-type cell wall cellulose biosynthetic process [GO:0052324];plant-type cell wall organization [GO:0009664]	10	3	456	50.7	8.6
4.34479	4.52071e-05	1.12369	I1L2L1	Peroxidase	other biological processes;other metabolic processes;stress response	hydrogen peroxide catabolic process [GO:0042744];response to oxidative stress [GO:0006979]	stress response	non-structural extracellular	extracellular region [GO:0005576]	non-structural extracellular	other molecular function	heme binding [GO:0020037];metal ion binding [GO:0046872];peroxidase activity [GO:0004601]	heme binding [GO:0020037]	extracellular region [GO:0005576];heme binding [GO:0020037];hydrogen peroxide catabolic process [GO:0042744];metal ion binding [GO:0046872];peroxidase activity [GO:0004601];response to oxidative stress [GO:0006979]	9	2	331	34.9	4.79
1.67376	0.0211955	1.11974	I1KK35	Uncharacterized protein	other biological processes	positive regulation of mitochondrial translation [GO:0070131]	positive regulation of mitochondrial translation [GO:0070131]	mitochondrion	mitochondrial matrix [GO:0005759];mitochondrion [GO:0005739]	mitochondrion	nucleic acid binding activity;translation activity	mitochondrial ribosome binding [GO:0097177];mRNA binding [GO:0003729];translation activator activity [GO:0008494]	nucleic acid binding activity	mitochondrial matrix [GO:0005759];mitochondrial ribosome binding [GO:0097177];mitochondrion [GO:0005739];mRNA binding [GO:0003729];positive regulation of mitochondrial translation [GO:0070131];translation activator activity [GO:0008494]	28	4	253	28.5	4.7
4.03475	9.23108e-05	1.11604	I1MER0	Uncharacterized protein			NA			NA	other molecular function	hydrolase activity, acting on ester bonds [GO:0016788]	hydrolase activity, acting on ester bonds [GO:0016788]	hydrolase activity, acting on ester bonds [GO:0016788]	6	2	389	43.5	6.02
1.61634	0.0241916	1.11367	A0A0R0HD06	Tr-type G domain-containing protein			NA			NA	other molecular function	GTP binding [GO:0005525];GTPase activity [GO:0003924]	GTP binding [GO:0005525]	GTP binding [GO:0005525];GTPase activity [GO:0003924]	7	4	527	57.2	6.16
1.53684	0.0290511	1.10751	I1NFP9	PB1 domain-containing protein			NA			NA			NA		15	5	721	78.2	6.3
3.71018	0.000194906	1.10495	A0A0R0FI80	Cellulose synthase	cell cycle OR cell proliferation;cell organization and biogenesis;other metabolic processes	cell wall organization [GO:0071555];cellulose biosynthetic process [GO:0030244]	cell wall organization [GO:0071555]	ER/Golgi;other membranes;plasma membrane	integral component of membrane [GO:0016021];plasma membrane [GO:0005886]	plasma membrane [GO:0005886]	other molecular function	cellulose synthase (UDP-forming) activity [GO:0016760];metal ion binding [GO:0046872]	metal ion binding [GO:0046872]	cell wall organization [GO:0071555];cellulose biosynthetic process [GO:0030244];cellulose synthase (UDP-forming) activity [GO:0016760];integral component of membrane [GO:0016021];metal ion binding [GO:0046872];plasma membrane [GO:0005886]	8	5	1034	116.5	6.7
1.65543	0.0221092	1.09368	C6TKM6	Uncharacterized protein			NA			NA			NA		35	9	432	47.9	4.64
1.93144	0.01171	1.08635	K7MQ50	RING-type E3 ubiquitin transferase	other metabolic processes;protein metabolism		protein metabolism	nucleus;other cell component	cytoplasm [GO:0005737];nucleus [GO:0005634]	nucleus	other molecular function	ubiquitin-protein transferase activity [GO:0004842]	ubiquitin-protein transferase activity [GO:0004842]	cytoplasm [GO:0005737];nucleus [GO:0005634];ubiquitin-protein transferase activity [GO:0004842]	20	8	841	91.1	5.9
3.38683	0.000410367	1.07644	O49855	Acid phosphatase	other metabolic processes		other metabolic processes			NA	other molecular function	acid phosphatase activity [GO:0003993]	acid phosphatase activity [GO:0003993]	acid phosphatase activity [GO:0003993]	15	2	264	30.1	7.36
3.22254	0.000599045	1.07526	C6TMQ0	Uncharacterized protein			NA			NA	other molecular function	transferase activity, transferring hexosyl groups [GO:0016758]	transferase activity, transferring hexosyl groups [GO:0016758]	transferase activity, transferring hexosyl groups [GO:0016758]	24	6	458	51.6	6.3
1.44489	0.0359015	1.07069	C6TK92	Biotin carboxyl carrier protein of acetyl-CoA carboxylase	other metabolic processes	fatty acid biosynthetic process [GO:0006633]	fatty acid biosynthetic process [GO:0006633]	other cell component	acetyl-CoA carboxylase complex [GO:0009317];chloroplast [GO:0009507]	chloroplast [GO:0009507]	other molecular function	acetyl-CoA carboxylase activity [GO:0003989]	acetyl-CoA carboxylase activity [GO:0003989]	acetyl-CoA carboxylase activity [GO:0003989];acetyl-CoA carboxylase complex [GO:0009317];chloroplast [GO:0009507];fatty acid biosynthetic process [GO:0006633]	33	4	280	29.3	7.99
3.65631	0.00022064	1.06774	D2D5G3	Methyltransferase	other metabolic processes	steroid biosynthetic process [GO:0006694]	steroid biosynthetic process [GO:0006694]			NA	other molecular function	methyltransferase activity [GO:0008168]	methyltransferase activity [GO:0008168]	methyltransferase activity [GO:0008168];steroid biosynthetic process [GO:0006694]	44	13	361	40.4	6.95
3.66364	0.000216948	1.05403	I1MW18	Uncharacterized protein			NA			NA	other molecular function	copper ion binding [GO:0005507];oxidoreductase activity [GO:0016491]	copper ion binding [GO:0005507]	copper ion binding [GO:0005507];oxidoreductase activity [GO:0016491]	19	8	544	60.4	9.17
1.69062	0.0203885	1.04923	I1J4K3	Uncharacterized protein	cell organization and biogenesis;transport	Golgi organization [GO:0007030];retrograde transport, vesicle recycling within Golgi [GO:0000301]	cell organization and biogenesis	ER/Golgi;other membranes	Golgi cisterna [GO:0031985];Golgi membrane [GO:0000139];integral component of membrane [GO:0016021]	ER/Golgi			NA	Golgi cisterna [GO:0031985];Golgi membrane [GO:0000139];Golgi organization [GO:0007030];integral component of membrane [GO:0016021];retrograde transport, vesicle recycling within Golgi [GO:0000301]	15	7	703	78	5.1
3.56343	0.000273257	1.03939	I1ND04	Uncharacterized protein			NA	other membranes	integral component of membrane [GO:0016021]	integral component of membrane [GO:0016021]			NA	integral component of membrane [GO:0016021]	14	15	1501	161.1	4.51
2.65483	0.00221394	1.03369	C6T3V3	Glutathione peroxidase	other biological processes;stress response	response to oxidative stress [GO:0006979]	stress response	cytosol		cytosol	other molecular function	glutathione peroxidase activity [GO:0004602];peroxidase activity [GO:0004601]	glutathione peroxidase activity [GO:0004602]	glutathione peroxidase activity [GO:0004602];peroxidase activity [GO:0004601];response to oxidative stress [GO:0006979]	22	4	170	19.1	9.61
1.37123	0.0425372	1.02851	I1M8J4	Uncharacterized protein			NA	cytosol	cytosol [GO:0005829]	cytosol	nucleic acid binding activity	mRNA binding [GO:0003729]	mRNA binding [GO:0003729]	cytosol [GO:0005829];mRNA binding [GO:0003729]	21	5	425	47	7.61
2.24902	0.00563607	1.02379	I1LDY0	RNA helicase			NA	nucleus	nucleolus [GO:0005730]	nucleus	nucleic acid binding activity;other molecular function	ATP binding [GO:0005524];RNA binding [GO:0003723];RNA helicase activity [GO:0003724]	ATP binding [GO:0005524]	ATP binding [GO:0005524];nucleolus [GO:0005730];RNA binding [GO:0003723];RNA helicase activity [GO:0003724]	11	5	697	75.7	8.76
3.08289	0.000826248	1.02314	I1NDI0	Uncharacterized protein			NA	cytosol;other cell component	cytosol [GO:0005829];ribonucleoprotein complex [GO:1990904]	cytosol	nucleic acid binding activity	mRNA binding [GO:0003729]	mRNA binding [GO:0003729]	cytosol [GO:0005829];mRNA binding [GO:0003729];ribonucleoprotein complex [GO:1990904]	22	7	465	50.8	6.04
3.09197	0.000809144	1.01896	A0A0R4J5M9	Uncharacterized protein	other metabolic processes;protein metabolism	proteolysis involved in cellular protein catabolic process [GO:0051603]	protein metabolism	non-structural extracellular;other cytoplasmic organelle	extracellular space [GO:0005615];lysosome [GO:0005764]	non-structural extracellular	other molecular function	cysteine-type endopeptidase activity [GO:0004197]	cysteine-type endopeptidase activity [GO:0004197]	cysteine-type endopeptidase activity [GO:0004197];extracellular space [GO:0005615];lysosome [GO:0005764];proteolysis involved in cellular protein catabolic process [GO:0051603]	18	4	353	38.8	7.59
3.64894	0.00022442	1.0187	C6TH50	Xyloglucan endotransglucosylase/hydrolase	cell organization and biogenesis;other biological processes;other metabolic processes	cell wall biogenesis [GO:0042546];cell wall organization [GO:0071555];xyloglucan metabolic process [GO:0010411]	cell organization and biogenesis	non-structural extracellular;other cell component	apoplast [GO:0048046];cell wall [GO:0005618]	non-structural extracellular	other molecular function	hydrolase activity, hydrolyzing O-glycosyl compounds [GO:0004553];xyloglucan:xyloglucosyl transferase activity [GO:0016762]	hydrolase activity	apoplast [GO:0048046];cell wall [GO:0005618];cell wall biogenesis [GO:0042546];cell wall organization [GO:0071555];hydrolase activity, hydrolyzing O-glycosyl compounds [GO:0004553];xyloglucan metabolic process [GO:0010411];xyloglucan:xyloglucosyl transferase activity [GO:0016762]	16	3	302	35	5.01
1.77181	0.0169116	1.01523	A0A1W7GJV3	DNA helicase	cell organization and biogenesis;DNA metabolism;other metabolic processes	DNA replication initiation [GO:0006270]	cell organization and biogenesis	nucleus;other cell component	MCM complex [GO:0042555];nucleus [GO:0005634]	nucleus	nucleic acid binding activity;other molecular function	ATP binding [GO:0005524];DNA binding [GO:0003677];DNA helicase activity [GO:0003678]	ATP binding [GO:0005524]	ATP binding [GO:0005524];DNA binding [GO:0003677];DNA helicase activity [GO:0003678];DNA replication initiation [GO:0006270];MCM complex [GO:0042555];nucleus [GO:0005634]	9	7	857	95.3	6.48
2.67179	0.00212917	1.00322	A0A0R0H2Z4	Uncharacterized protein			NA	other membranes	integral component of membrane [GO:0016021]	integral component of membrane [GO:0016021]	other molecular function	heme binding [GO:0020037];iron ion binding [GO:0005506];monooxygenase activity [GO:0004497];oxidoreductase activity, acting on paired donors, with incorporation or reduction of molecular oxygen [GO:0016705]	heme binding [GO:0020037]	heme binding [GO:0020037];integral component of membrane [GO:0016021];iron ion binding [GO:0005506];monooxygenase activity [GO:0004497];oxidoreductase activity, acting on paired donors, with incorporation or reduction of molecular oxygen [GO:0016705]	29	10	524	59.8	8.94
1.64843	0.0224682	0.999916	I1KGU0	40S ribosomal protein S12	other metabolic processes;protein metabolism	translation [GO:0006412]	protein metabolism	cytosol;translational apparatus	cytosolic small ribosomal subunit [GO:0022627]	cytosol	other molecular function	structural constituent of ribosome [GO:0003735]	structural constituent of ribosome [GO:0003735]	cytosolic small ribosomal subunit [GO:0022627];structural constituent of ribosome [GO:0003735];translation [GO:0006412]	77	10	143	15.1	5.77
3.07639	0.000838698	0.997118	I1L0Z7	Uncharacterized protein	transport	transmembrane transport [GO:0055085]	transport	other cytoplasmic organelle;other membranes	integral component of membrane [GO:0016021];membrane [GO:0016020];plant-type vacuole [GO:0000325];vacuolar membrane [GO:0005774]	integral component of membrane [GO:0016021];membrane [GO:0016020];plant-type vacuole [GO:0000325];vacuolar membrane [GO:0005774]	other molecular function;transporter activity	ATP binding [GO:0005524];ATPase activity [GO:0016887];ATPase-coupled transmembrane transporter activity [GO:0042626]	ATP binding [GO:0005524]	ATP binding [GO:0005524];ATPase activity [GO:0016887];ATPase-coupled transmembrane transporter activity [GO:0042626];integral component of membrane [GO:0016021];membrane [GO:0016020];plant-type vacuole [GO:0000325];transmembrane transport [GO:0055085];vacuolar membrane [GO:0005774]	12	11	1506	168.3	7.47
2.57623	0.00265321	0.995186	I1LFX6	Uncharacterized protein	cell cycle OR cell proliferation;cell organization and biogenesis;DNA metabolism	reciprocal meiotic recombination [GO:0007131]	DNA metabolism			NA			NA	reciprocal meiotic recombination [GO:0007131]	13	7	861	96.9	4.89
3.79466	0.000160451	0.989736	I1JBS3	Uncharacterized protein			NA			NA			NA		35	10	445	48.6	5.29
3.37775	0.000419033	0.986159	I1LN10	Uncharacterized protein	other metabolic processes	aromatic compound biosynthetic process [GO:0019438]	aromatic compound biosynthetic process [GO:0019438]		cytosol [GO:0005829]	cytosol [GO:0005829]	other molecular function	O-methyltransferase activity [GO:0008171];protein dimerization activity [GO:0046983];S-adenosylmethionine-dependent methyltransferase activity [GO:0008757]	NA	aromatic compound biosynthetic process [GO:0019438];cytosol [GO:0005829];O-methyltransferase activity [GO:0008171];protein dimerization activity [GO:0046983];S-adenosylmethionine-dependent methyltransferase activity [GO:0008757]	16	4	366	40.5	5.48
2.21766	0.00605817	0.982819	Q2MJR5	Inositol-3-phosphate synthase	other metabolic processes	inositol biosynthetic process [GO:0006021];phospholipid biosynthetic process [GO:0008654]	NA	other cell component	cytoplasm [GO:0005737]	cytoplasm [GO:0005737]	other molecular function	inositol-3-phosphate synthase activity [GO:0004512]	inositol-3-phosphate synthase activity [GO:0004512]	cytoplasm [GO:0005737];inositol biosynthetic process [GO:0006021];inositol-3-phosphate synthase activity [GO:0004512];phospholipid biosynthetic process [GO:0008654]	44	14	510	56.4	5.54
2.7955	0.00160141	0.975317	I1NEN3	Uncharacterized protein			NA	other membranes;plasma membrane	plasma membrane [GO:0005886]	plasma membrane	other molecular function	calcium ion binding [GO:0005509]	calcium ion binding [GO:0005509]	calcium ion binding [GO:0005509];plasma membrane [GO:0005886]	6	4	802	89.7	6.43
3.73868	0.000182524	0.97442	I1KP02	Uncharacterized protein	cell cycle OR cell proliferation;other biological processes		cell cycle OR cell proliferation			NA	other molecular function		other molecular function		34	15	575	65.3	5.05
1.4605	0.034634	0.973918	I1KG78	Ig-like domain-containing protein			NA	cytosol;nucleus	cytosol [GO:0005829];nucleus [GO:0005634]	cytosol	other molecular function	ATP binding [GO:0005524]	ATP binding [GO:0005524]	ATP binding [GO:0005524];cytosol [GO:0005829];nucleus [GO:0005634]	35	26	857	94.7	5.39
1.49731	0.0318196	0.973208	I1K642	Uncharacterized protein			NA	other cytoplasmic organelle;other membranes	integral component of membrane [GO:0016021];vacuole [GO:0005773]	vacuole [GO:0005773]	other molecular function	catalytic activity [GO:0003824]	catalytic activity [GO:0003824]	catalytic activity [GO:0003824];integral component of membrane [GO:0016021];vacuole [GO:0005773]	7	3	487	53.6	6.68
1.5717	0.02681	0.970965	I1N337	Uncharacterized protein			NA		intracellular membrane-bounded organelle [GO:0043231]	intracellular membrane-bounded organelle [GO:0043231]	other molecular function	quercetin 3-O-glucosyltransferase activity [GO:0080043];quercetin 7-O-glucosyltransferase activity [GO:0080044];UDP-glycosyltransferase activity [GO:0008194]	NA	intracellular membrane-bounded organelle [GO:0043231];quercetin 3-O-glucosyltransferase activity [GO:0080043];quercetin 7-O-glucosyltransferase activity [GO:0080044];UDP-glycosyltransferase activity [GO:0008194]	15	5	492	55.8	6.46
1.93521	0.0116087	0.966826	Q9GE06	Biotin carboxyl carrier protein of acetyl-CoA carboxylase	other metabolic processes	fatty acid biosynthetic process [GO:0006633]	fatty acid biosynthetic process [GO:0006633]	other cell component	acetyl-CoA carboxylase complex [GO:0009317];chloroplast [GO:0009507]	chloroplast [GO:0009507]	other molecular function	acetyl-CoA carboxylase activity [GO:0003989]	acetyl-CoA carboxylase activity [GO:0003989]	acetyl-CoA carboxylase activity [GO:0003989];acetyl-CoA carboxylase complex [GO:0009317];chloroplast [GO:0009507];fatty acid biosynthetic process [GO:0006633]	9	2	284	29.7	8.21
1.82279	0.0150385	0.963974	I1KH92	Uncharacterized protein	other metabolic processes	lipid metabolic process [GO:0006629]	lipid metabolic process [GO:0006629]	other cell component;other membranes	integral component of membrane [GO:0016021]	integral component of membrane [GO:0016021]	other molecular function	O-acyltransferase activity [GO:0008374]	O-acyltransferase activity [GO:0008374]	integral component of membrane [GO:0016021];lipid metabolic process [GO:0006629];O-acyltransferase activity [GO:0008374]	8	3	676	75.5	6.73
1.75436	0.0176051	0.960207	Q2LAK6	Cytochrome P450 monooxygenase CYP72A68 (Fragment)			NA			NA	other molecular function	heme binding [GO:0020037];iron ion binding [GO:0005506];monooxygenase activity [GO:0004497];oxidoreductase activity, acting on paired donors, with incorporation or reduction of molecular oxygen [GO:0016705]	heme binding [GO:0020037]	heme binding [GO:0020037];iron ion binding [GO:0005506];monooxygenase activity [GO:0004497];oxidoreductase activity, acting on paired donors, with incorporation or reduction of molecular oxygen [GO:0016705]	7	3	457	52.2	8.4
4.52362	2.9949e-05	0.955293	Q9ZNZ5	Peroxidase (Fragment)	other biological processes;other metabolic processes;stress response	hydrogen peroxide catabolic process [GO:0042744];response to oxidative stress [GO:0006979]	stress response	non-structural extracellular	extracellular region [GO:0005576]	non-structural extracellular	other molecular function	heme binding [GO:0020037];metal ion binding [GO:0046872];peroxidase activity [GO:0004601]	heme binding [GO:0020037]	extracellular region [GO:0005576];heme binding [GO:0020037];hydrogen peroxide catabolic process [GO:0042744];metal ion binding [GO:0046872];peroxidase activity [GO:0004601];response to oxidative stress [GO:0006979]	45	10	351	38.5	8.13
3.93982	0.000114863	0.951391	A0A0R0IKU5	Uncharacterized protein	other biological processes;other metabolic processes	phosphatidylinositol biosynthetic process [GO:0006661]	phosphatidylinositol biosynthetic process [GO:0006661]	other cytoplasmic organelle;other membranes	PAS complex [GO:0070772]	PAS complex [GO:0070772]			NA	PAS complex [GO:0070772];phosphatidylinositol biosynthetic process [GO:0006661]	6	4	702	78.5	6.09
3.68068	0.000208604	0.950976	I1KG47	D-3-phosphoglycerate dehydrogenase	other metabolic processes	cellular amino acid metabolic process [GO:0006520];L-serine biosynthetic process [GO:0006564]	amino acid metabolic process [GO:0006520]	other cell component	chloroplast stroma [GO:0009570]	chloroplast stroma [GO:0009570]	other molecular function	NAD binding [GO:0051287];phosphoglycerate dehydrogenase activity [GO:0004617]	NAD binding [GO:0051287]	cellular amino acid metabolic process [GO:0006520];chloroplast stroma [GO:0009570];L-serine biosynthetic process [GO:0006564];NAD binding [GO:0051287];phosphoglycerate dehydrogenase activity [GO:0004617]	46	15	623	66.2	7.71
4.04998	8.91289e-05	0.950686	A0A0R0IWY8	Uncharacterized protein			NA			NA	other molecular function	oxidoreductase activity [GO:0016491]	oxidoreductase activity [GO:0016491]	oxidoreductase activity [GO:0016491]	21	8	670	75.1	6.1
4.3015	4.99458e-05	0.946998	I1K2X6	FAD-binding PCMH-type domain-containing protein			NA			NA	other molecular function	FAD binding [GO:0071949];oxidoreductase activity [GO:0016491]	FAD binding [GO:0071949]	FAD binding [GO:0071949];oxidoreductase activity [GO:0016491]	24	8	531	59.5	9.03
2.03632	0.00919768	0.94516	C6T8E8	Uncharacterized protein	other metabolic processes	carboxylic acid metabolic process [GO:0019752]	carboxylic acid metabolic process [GO:0019752]			NA	other molecular function	carboxy-lyase activity [GO:0016831];pyridoxal phosphate binding [GO:0030170]	carboxy-lyase activity [GO:0016831]	carboxylic acid metabolic process [GO:0019752];carboxy-lyase activity [GO:0016831];pyridoxal phosphate binding [GO:0030170]	16	5	483	54.6	6.14
3.532	0.000293763	0.943606	I1KB01	Uncharacterized protein			NA			NA	nucleic acid binding activity	RNA binding [GO:0003723]	RNA binding [GO:0003723]	RNA binding [GO:0003723]	9	2	378	41.6	6.93
2.58853	0.00257908	0.940702	C6TNG2	S-adenosylmethionine synthase	other metabolic processes	one-carbon metabolic process [GO:0006730];S-adenosylmethionine biosynthetic process [GO:0006556]	NA	other cell component		other cell component	other molecular function	ATP binding [GO:0005524];metal ion binding [GO:0046872];methionine adenosyltransferase activity [GO:0004478]	ATP binding [GO:0005524]	ATP binding [GO:0005524];metal ion binding [GO:0046872];methionine adenosyltransferase activity [GO:0004478];one-carbon metabolic process [GO:0006730];S-adenosylmethionine biosynthetic process [GO:0006556]	76	23	394	43.2	5.91
2.9521	0.00111661	0.938439	A0A0R4J3S9	YTH domain-containing protein			NA			NA	nucleic acid binding activity	RNA binding [GO:0003723]	RNA binding [GO:0003723]	RNA binding [GO:0003723]	20	12	678	74.1	6.55
2.92334	0.00119305	0.937411	I1MXV5	GYF domain-containing protein			NA			NA			NA		3	3	1783	195.2	6.4
1.37956	0.041729	0.936405	I1MC17	PKS_ER domain-containing protein	other metabolic processes	lignin biosynthetic process [GO:0009809]	lignin biosynthetic process [GO:0009809]			NA	other molecular function	cinnamyl-alcohol dehydrogenase activity [GO:0045551];oxidoreductase activity, acting on the CH-OH group of donors, NAD or NADP as acceptor [GO:0016616];zinc ion binding [GO:0008270]	zinc ion binding [GO:0008270]	cinnamyl-alcohol dehydrogenase activity [GO:0045551];lignin biosynthetic process [GO:0009809];oxidoreductase activity, acting on the CH-OH group of donors, NAD or NADP as acceptor [GO:0016616];zinc ion binding [GO:0008270]	40	8	361	39.3	7.09
2.8668	0.00135895	0.934996	A0A0R4J2T7	Peroxidase	other biological processes;other metabolic processes;stress response	hydrogen peroxide catabolic process [GO:0042744];response to oxidative stress [GO:0006979]	stress response	non-structural extracellular	extracellular region [GO:0005576]	non-structural extracellular	other molecular function	heme binding [GO:0020037];metal ion binding [GO:0046872];peroxidase activity [GO:0004601]	heme binding [GO:0020037]	extracellular region [GO:0005576];heme binding [GO:0020037];hydrogen peroxide catabolic process [GO:0042744];metal ion binding [GO:0046872];peroxidase activity [GO:0004601];response to oxidative stress [GO:0006979]	13	3	330	35.8	8.29
1.53304	0.0293065	0.93422	A0A0R0GFB2	Uncharacterized protein	other metabolic processes	carbohydrate metabolic process [GO:0005975]	carbohydrate metabolic process [GO:0005975]			NA	other molecular function	beta-glucosidase activity [GO:0008422]	beta-glucosidase activity [GO:0008422]	beta-glucosidase activity [GO:0008422];carbohydrate metabolic process [GO:0005975]	38	12	510	57.5	8.87
3.24178	0.00057308	0.929687	I1JNC7	HP domain-containing protein	cell organization and biogenesis;other biological processes	cytoskeleton organization [GO:0007010]	cell organization and biogenesis			NA	cytoskeletal activity	actin filament binding [GO:0051015]	actin filament binding [GO:0051015]	actin filament binding [GO:0051015];cytoskeleton organization [GO:0007010]	24	15	984	108.5	5.83
2.80876	0.00155326	0.926447	I1MIG3	Glycosyltransferase			NA		intracellular membrane-bounded organelle [GO:0043231]	intracellular membrane-bounded organelle [GO:0043231]	other molecular function	quercetin 3-O-glucosyltransferase activity [GO:0080043];quercetin 7-O-glucosyltransferase activity [GO:0080044];UDP-glycosyltransferase activity [GO:0008194]	NA	intracellular membrane-bounded organelle [GO:0043231];quercetin 3-O-glucosyltransferase activity [GO:0080043];quercetin 7-O-glucosyltransferase activity [GO:0080044];UDP-glycosyltransferase activity [GO:0008194]	26	8	501	56.4	5.92
2.36422	0.00432291	0.915875	A0A0R0J8F6	Uncharacterized protein	other metabolic processes	carbohydrate metabolic process [GO:0005975]	carbohydrate metabolic process [GO:0005975]			NA	other molecular function	beta-glucosidase activity [GO:0008422]	beta-glucosidase activity [GO:0008422]	beta-glucosidase activity [GO:0008422];carbohydrate metabolic process [GO:0005975]	4	2	524	59.7	6.23
2.84855	0.00141725	0.915306	I1JPQ2	S-adenosylmethionine synthase	other metabolic processes	one-carbon metabolic process [GO:0006730];S-adenosylmethionine biosynthetic process [GO:0006556]	NA	cytosol	cytosol [GO:0005829]	cytosol	other molecular function	ATP binding [GO:0005524];metal ion binding [GO:0046872];methionine adenosyltransferase activity [GO:0004478]	ATP binding [GO:0005524]	ATP binding [GO:0005524];cytosol [GO:0005829];metal ion binding [GO:0046872];methionine adenosyltransferase activity [GO:0004478];one-carbon metabolic process [GO:0006730];S-adenosylmethionine biosynthetic process [GO:0006556]	54	16	390	42.7	6.6
2.07076	0.00849648	0.908964	A0A0R0HER9	Conserved oligomeric Golgi complex subunit 6	transport	intra-Golgi vesicle-mediated transport [GO:0006891];protein transport [GO:0015031]	transport	ER/Golgi;other membranes	Golgi membrane [GO:0000139];Golgi transport complex [GO:0017119]	ER/Golgi			NA	Golgi membrane [GO:0000139];Golgi transport complex [GO:0017119];intra-Golgi vesicle-mediated transport [GO:0006891];protein transport [GO:0015031]	19	7	693	76.7	5.96
4.60728	2.47013e-05	0.907492	A7LCD5	Lipoxygenase	other metabolic processes	oxylipin biosynthetic process [GO:0031408]	oxylipin biosynthetic process [GO:0031408]	other cell component		other cell component	other molecular function	metal ion binding [GO:0046872];oxidoreductase activity, acting on single donors with incorporation of molecular oxygen, incorporation of two atoms of oxygen [GO:0016702]	metal ion binding [GO:0046872]	metal ion binding [GO:0046872];oxidoreductase activity, acting on single donors with incorporation of molecular oxygen, incorporation of two atoms of oxygen [GO:0016702];oxylipin biosynthetic process [GO:0031408]	40	26	865	96.3	7.02
1.93483	0.011619	0.901666	I1M9Z5	Uncharacterized protein	other metabolic processes;protein metabolism;RNA metabolism OR transcription	rRNA processing [GO:0006364]	RNA metabolism OR transcription			NA	other molecular function	metalloendopeptidase activity [GO:0004222]	metalloendopeptidase activity [GO:0004222]	metalloendopeptidase activity [GO:0004222];rRNA processing [GO:0006364]	8	3	581	64.6	6.37
2.15964	0.00692405	0.900125	I1LHY5	Uncharacterized protein	other metabolic processes	lignin biosynthetic process [GO:0009809]	lignin biosynthetic process [GO:0009809]		membrane [GO:0016020]	membrane [GO:0016020]	other molecular function	heme binding [GO:0020037];iron ion binding [GO:0005506];oxidoreductase activity, acting on paired donors, with incorporation or reduction of molecular oxygen, NAD(P)H as one donor, and incorporation of one atom of oxygen [GO:0016709]	heme binding [GO:0020037]	heme binding [GO:0020037];iron ion binding [GO:0005506];lignin biosynthetic process [GO:0009809];membrane [GO:0016020];oxidoreductase activity, acting on paired donors, with incorporation or reduction of molecular oxygen, NAD(P)H as one donor, and incorporation of one atom of oxygen [GO:0016709]	5	2	521	58.8	6.87
1.67994	0.020896	0.895057	I1N7U4	Uncharacterized protein	transport	transmembrane transport [GO:0055085]	transport	other cytoplasmic organelle;other membranes	integral component of membrane [GO:0016021];vacuolar membrane [GO:0005774]	vacuolar			NA	integral component of membrane [GO:0016021];transmembrane transport [GO:0055085];vacuolar membrane [GO:0005774]	5	2	674	74	5.17
1.74429	0.0180181	0.890166	I1KG57	O-fucosyltransferase family protein	other metabolic processes	fucose metabolic process [GO:0006004]	fucose metabolic process [GO:0006004]	other membranes	integral component of membrane [GO:0016021]	integral component of membrane [GO:0016021]	other molecular function	transferase activity, transferring glycosyl groups [GO:0016757]	transferase activity, transferring glycosyl groups [GO:0016757]	fucose metabolic process [GO:0006004];integral component of membrane [GO:0016021];transferase activity, transferring glycosyl groups [GO:0016757]	39	11	416	46.6	5.88
1.65772	0.0219928	0.886898	C6TAS0	DNA-directed RNA polymerases I and III subunit RPAC1	other metabolic processes;RNA metabolism OR transcription	transcription, DNA-templated [GO:0006351]	RNA metabolism OR transcription	nucleus		nucleus	nucleic acid binding activity;other molecular function	DNA binding [GO:0003677];DNA-directed 5'-3' RNA polymerase activity [GO:0003899];protein dimerization activity [GO:0046983]	DNA binding [GO:0003677]	DNA binding [GO:0003677];DNA-directed 5'-3' RNA polymerase activity [GO:0003899];protein dimerization activity [GO:0046983];transcription, DNA-templated [GO:0006351]	9	2	388	43.3	5.4
3.06451	0.00086197	0.884913	A0A0R0HL99	C2 domain-containing protein	other biological processes		other biological processes	other cell component		other cell component	cytoskeletal activity		cytoskeletal activity		24	33	2219	237.3	5.63
1.51474	0.0305674	0.882712	I1MPF6	Uncharacterized protein	other biological processes;stress response	defense response to fungus [GO:0050832];protein stabilization [GO:0050821];regulation of defense response to fungus, incompatible interaction [GO:2000072];regulation of protein stability [GO:0031647]	stress response	nucleus;other cell component	cytoplasm [GO:0005737];nucleus [GO:0005634]	nucleus	other molecular function		other molecular function	cytoplasm [GO:0005737];defense response to fungus [GO:0050832];nucleus [GO:0005634];protein stabilization [GO:0050821];regulation of defense response to fungus, incompatible interaction [GO:2000072];regulation of protein stability [GO:0031647]	27	7	359	40.4	5.27
2.69311	0.00202717	0.880881	C6THP4	Peroxidase	other biological processes;other metabolic processes;stress response	hydrogen peroxide catabolic process [GO:0042744];response to oxidative stress [GO:0006979]	stress response	non-structural extracellular	extracellular region [GO:0005576]	non-structural extracellular	other molecular function	heme binding [GO:0020037];metal ion binding [GO:0046872];peroxidase activity [GO:0004601]	heme binding [GO:0020037]	extracellular region [GO:0005576];heme binding [GO:0020037];hydrogen peroxide catabolic process [GO:0042744];metal ion binding [GO:0046872];peroxidase activity [GO:0004601];response to oxidative stress [GO:0006979]	15	4	326	36.1	8.92
1.48132	0.033013	0.878579	I1J8R4	Peroxidase	other biological processes;other metabolic processes;stress response	hydrogen peroxide catabolic process [GO:0042744];response to oxidative stress [GO:0006979]	stress response	non-structural extracellular	extracellular region [GO:0005576]	non-structural extracellular	other molecular function	heme binding [GO:0020037];metal ion binding [GO:0046872];peroxidase activity [GO:0004601]	heme binding [GO:0020037]	extracellular region [GO:0005576];heme binding [GO:0020037];hydrogen peroxide catabolic process [GO:0042744];metal ion binding [GO:0046872];peroxidase activity [GO:0004601];response to oxidative stress [GO:0006979]	49	12	331	36.4	9.06
2.28368	0.00520377	0.877608	I1JAM9	Uncharacterized protein			NA			NA	other molecular function	catalytic activity [GO:0003824];metal ion binding [GO:0046872]	metal ion binding [GO:0046872]	catalytic activity [GO:0003824];metal ion binding [GO:0046872]	5	4	1253	139.6	6.67
1.45461	0.0351065	0.876952	I1KH95	DUF1296 domain-containing protein			NA			NA			NA		7	3	863	93	8.76
1.30307	0.0497661	0.870713	A0A0R4J4X0	PMR5N domain-containing protein			NA	ER/Golgi	Golgi apparatus [GO:0005794]	ER/Golgi	other molecular function	O-acetyltransferase activity [GO:0016413]	O-acetyltransferase activity [GO:0016413]	Golgi apparatus [GO:0005794];O-acetyltransferase activity [GO:0016413]	10	3	369	42.6	8.76
1.41139	0.03878	0.864629	I1KVS6	D-3-phosphoglycerate dehydrogenase	other metabolic processes	cellular amino acid metabolic process [GO:0006520];L-serine biosynthetic process [GO:0006564]	amino acid metabolic process [GO:0006520]	other cell component	chloroplast stroma [GO:0009570]	chloroplast stroma [GO:0009570]	other molecular function	NAD binding [GO:0051287];phosphoglycerate dehydrogenase activity [GO:0004617]	NAD binding [GO:0051287]	cellular amino acid metabolic process [GO:0006520];chloroplast stroma [GO:0009570];L-serine biosynthetic process [GO:0006564];NAD binding [GO:0051287];phosphoglycerate dehydrogenase activity [GO:0004617]	47	14	621	66	6.9
2.70324	0.00198041	0.862332	K7LK48	Methyltransferase	other metabolic processes		other metabolic processes	ER/Golgi;other cell component;other cytoplasmic organelle;other membranes	endosome [GO:0005768];Golgi apparatus [GO:0005794];integral component of membrane [GO:0016021];trans-Golgi network [GO:0005802]	ER/Golgi	other molecular function	methyltransferase activity [GO:0008168]	methyltransferase activity [GO:0008168]	endosome [GO:0005768];Golgi apparatus [GO:0005794];integral component of membrane [GO:0016021];methyltransferase activity [GO:0008168];trans-Golgi network [GO:0005802]	31	15	621	70.5	6.64
3.27236	0.000534125	0.860544	I1MPC6	Pyruvate kinase	other metabolic processes	cellular response to insulin stimulus [GO:0032869];glycolytic process [GO:0006096]	glycolytic process [GO:0006096]	other cell component	chloroplast stroma [GO:0009570];cytoplasm [GO:0005737]	chloroplast	kinase activity;other molecular function	kinase activity [GO:0016301];magnesium ion binding [GO:0000287];potassium ion binding [GO:0030955];pyruvate kinase activity [GO:0004743]	kinase activity [GO:0016301]	cellular response to insulin stimulus [GO:0032869];chloroplast stroma [GO:0009570];cytoplasm [GO:0005737];glycolytic process [GO:0006096];kinase activity [GO:0016301];magnesium ion binding [GO:0000287];potassium ion binding [GO:0030955];pyruvate kinase activity [GO:0004743]	32	12	577	63.6	6.99
1.67641	0.0210665	0.856278	I1MVG7	Uncharacterized protein			NA			NA			NA		26	11	697	76.9	4.35
3.36363	0.000432879	0.854016	K7LZS3	Uncharacterized protein	signal transduction;transport	ethylene-activated signaling pathway [GO:0009873]	transport	other membranes	integral component of membrane [GO:0016021]	integral component of membrane [GO:0016021]	transporter activity	cadmium ion transmembrane transporter activity [GO:0015086];manganese ion transmembrane transporter activity [GO:0005384]	transporter activity	cadmium ion transmembrane transporter activity [GO:0015086];ethylene-activated signaling pathway [GO:0009873];integral component of membrane [GO:0016021];manganese ion transmembrane transporter activity [GO:0005384]	3	3	1313	143.8	5.99
1.34201	0.0454981	0.851029	I1KRB6	FAD-binding PCMH-type domain-containing protein			NA			NA	other molecular function	FAD binding [GO:0071949];oxidoreductase activity [GO:0016491]	FAD binding [GO:0071949]	FAD binding [GO:0071949];oxidoreductase activity [GO:0016491]	26	10	523	58.4	9.55
1.70432	0.0197553	0.850528	I1LWV7	UDP-arabinopyranose mutase	other biological processes;other metabolic processes	plant-type cell wall biogenesis [GO:0009832];UDP-L-arabinose metabolic process [GO:0033356]	cell wall biogenesis [GO:0009832]	cytosol;ER/Golgi	cytosol [GO:0005829];Golgi apparatus [GO:0005794]	cytosol	other molecular function	UDP-arabinopyranose mutase activity [GO:0052691]	UDP-arabinopyranose mutase activity [GO:0052691]	cytosol [GO:0005829];Golgi apparatus [GO:0005794];plant-type cell wall biogenesis [GO:0009832];UDP-arabinopyranose mutase activity [GO:0052691];UDP-L-arabinose metabolic process [GO:0033356]	40	14	357	40.5	5.77
1.63385	0.0232356	0.84982	I1LYX3	Phosphatidate phosphatase	other metabolic processes		other metabolic processes			NA	other molecular function	phosphatidate phosphatase activity [GO:0008195]	phosphatidate phosphatase activity [GO:0008195]	phosphatidate phosphatase activity [GO:0008195]	8	4	890	98.4	4.93
1.81727	0.0152309	0.848397	A0A0R0JA58	Uncharacterized protein	other metabolic processes;signal transduction	phosphatidylinositol phosphorylation [GO:0046854];phosphatidylinositol-mediated signaling [GO:0048015]	signal transduction			NA	kinase activity	kinase activity [GO:0016301]	kinase activity [GO:0016301]	kinase activity [GO:0016301];phosphatidylinositol phosphorylation [GO:0046854];phosphatidylinositol-mediated signaling [GO:0048015]	4	4	1878	206.6	6.39
1.49722	0.0318262	0.844213	A0A0R4J4W7	Peroxidase	other biological processes;other metabolic processes;stress response	hydrogen peroxide catabolic process [GO:0042744];response to oxidative stress [GO:0006979]	stress response	non-structural extracellular;other cell component	extracellular region [GO:0005576];plant-type cell wall [GO:0009505];plasmodesma [GO:0009506]	non-structural extracellular	other molecular function	heme binding [GO:0020037];metal ion binding [GO:0046872];peroxidase activity [GO:0004601]	heme binding [GO:0020037]	extracellular region [GO:0005576];heme binding [GO:0020037];hydrogen peroxide catabolic process [GO:0042744];metal ion binding [GO:0046872];peroxidase activity [GO:0004601];plant-type cell wall [GO:0009505];plasmodesma [GO:0009506];response to oxidative stress [GO:0006979]	6	2	329	36.8	6.52
1.97013	0.010712	0.838538	C6T064	40S ribosomal protein S12	other metabolic processes;protein metabolism	translation [GO:0006412]	protein metabolism	translational apparatus	cytosolic small ribosomal subunit [GO:0022627]	translational apparatus	other molecular function	structural constituent of ribosome [GO:0003735]	structural constituent of ribosome [GO:0003735]	cytosolic small ribosomal subunit [GO:0022627];structural constituent of ribosome [GO:0003735];translation [GO:0006412]	77	10	141	14.9	5.77
1.99449	0.0101278	0.837549	A0A0R4J354	Uncharacterized protein	other biological processes;other metabolic processes;transport	mRNA export from nucleus [GO:0006406];regulation of DNA-templated transcription, elongation [GO:0032784]	transport	nucleus	THO complex [GO:0000347];THO complex part of transcription export complex [GO:0000445]	nucleus			NA	mRNA export from nucleus [GO:0006406];regulation of DNA-templated transcription, elongation [GO:0032784];THO complex [GO:0000347];THO complex part of transcription export complex [GO:0000445]	10	3	605	68.9	5.31
1.41497	0.0384618	0.837152	I1KW32	Uncharacterized protein			NA			NA			NA		19	5	424	45.9	5.92
2.11568	0.00766165	0.836806	I1KZR0	Dynamin GTPase	cell organization and biogenesis	mitochondrial fission [GO:0000266]	cell organization and biogenesis	cytoskeleton;other cell component;other membranes	cytoplasm [GO:0005737];membrane [GO:0016020]	cytoskeleton	cytoskeletal activity;other molecular function	GTP binding [GO:0005525];GTPase activity [GO:0003924];microtubule binding [GO:0008017]	GTP binding [GO:0005525]	cytoplasm [GO:0005737];GTP binding [GO:0005525];GTPase activity [GO:0003924];membrane [GO:0016020];microtubule binding [GO:0008017];mitochondrial fission [GO:0000266]	22	16	922	100.1	9.06
1.71739	0.0191696	0.836614	I1KMC9	Uncharacterized protein			NA	cytosol;other cell component	cytosol [GO:0005829];ribonucleoprotein complex [GO:1990904]	cytosol	nucleic acid binding activity	mRNA binding [GO:0003729]	mRNA binding [GO:0003729]	cytosol [GO:0005829];mRNA binding [GO:0003729];ribonucleoprotein complex [GO:1990904]	21	6	412	45.2	5.71
4.71334	1.93492e-05	0.836591	I1KW78	Uncharacterized protein			NA	other membranes	integral component of membrane [GO:0016021]	integral component of membrane [GO:0016021]	other molecular function	heme binding [GO:0020037];iron ion binding [GO:0005506];monooxygenase activity [GO:0004497];oxidoreductase activity, acting on paired donors, with incorporation or reduction of molecular oxygen [GO:0016705]	heme binding [GO:0020037]	heme binding [GO:0020037];integral component of membrane [GO:0016021];iron ion binding [GO:0005506];monooxygenase activity [GO:0004497];oxidoreductase activity, acting on paired donors, with incorporation or reduction of molecular oxygen [GO:0016705]	31	13	533	60.8	9.16
1.6576	0.0219989	0.832403	Q2LAL4	Cytochrome P450 monooxygenase CYP83E8			NA		membrane [GO:0016020]	membrane [GO:0016020]	other molecular function	heme binding [GO:0020037];iron ion binding [GO:0005506];oxidoreductase activity, acting on paired donors, with incorporation or reduction of molecular oxygen, NAD(P)H as one donor, and incorporation of one atom of oxygen [GO:0016709]	heme binding [GO:0020037]	heme binding [GO:0020037];iron ion binding [GO:0005506];membrane [GO:0016020];oxidoreductase activity, acting on paired donors, with incorporation or reduction of molecular oxygen, NAD(P)H as one donor, and incorporation of one atom of oxygen [GO:0016709]	21	8	499	57.4	7.96
2.4814	0.00330067	0.832403	I1KZ41	Glycosyltransferase			NA		intracellular membrane-bounded organelle [GO:0043231]	intracellular membrane-bounded organelle [GO:0043231]	other molecular function	quercetin 3-O-glucosyltransferase activity [GO:0080043];quercetin 7-O-glucosyltransferase activity [GO:0080044];UDP-glycosyltransferase activity [GO:0008194]	NA	intracellular membrane-bounded organelle [GO:0043231];quercetin 3-O-glucosyltransferase activity [GO:0080043];quercetin 7-O-glucosyltransferase activity [GO:0080044];UDP-glycosyltransferase activity [GO:0008194]	26	7	481	54.3	6.74
4.18456	6.53789e-05	0.829398	I1JUE0	Cellulose synthase	cell cycle OR cell proliferation;cell organization and biogenesis;other metabolic processes	cell wall organization [GO:0071555];cellulose biosynthetic process [GO:0030244];plant-type primary cell wall biogenesis [GO:0009833]	cell wall organization [GO:0071555]	ER/Golgi;other membranes;plasma membrane	Golgi apparatus [GO:0005794];integral component of membrane [GO:0016021];plasma membrane [GO:0005886];trans-Golgi network [GO:0005802]	plasma membrane [GO:0005886]	other molecular function	cellulose synthase (UDP-forming) activity [GO:0016760];cellulose synthase activity [GO:0016759];metal ion binding [GO:0046872]	metal ion binding [GO:0046872]	cell wall organization [GO:0071555];cellulose biosynthetic process [GO:0030244];cellulose synthase (UDP-forming) activity [GO:0016760];cellulose synthase activity [GO:0016759];Golgi apparatus [GO:0005794];integral component of membrane [GO:0016021];metal ion binding [GO:0046872];plant-type primary cell wall biogenesis [GO:0009833];plasma membrane [GO:0005886];trans-Golgi network [GO:0005802]	21	14	1084	122	6.76
3.60276	0.000249599	0.827249	I1KFY7	UDP glucuronic acid:soyasapogenol glucuronosyltransferase	cell cycle OR cell proliferation;other metabolic processes	cell wall organization [GO:0071555];cellulose biosynthetic process [GO:0030244];plant-type primary cell wall biogenesis [GO:0009833]	cell cycle OR cell proliferation	ER/Golgi;other membranes;plasma membrane	Golgi apparatus [GO:0005794];integral component of membrane [GO:0016021];plasma membrane [GO:0005886];trans-Golgi network [GO:0005802]	plasma membrane [GO:0005886]	other molecular function	cellulose synthase (UDP-forming) activity [GO:0016760];cellulose synthase activity [GO:0016759]	cellulose synthase activity [GO:0016759]	cell wall organization [GO:0071555];cellulose biosynthetic process [GO:0030244];cellulose synthase (UDP-forming) activity [GO:0016760];cellulose synthase activity [GO:0016759];Golgi apparatus [GO:0005794];integral component of membrane [GO:0016021];plant-type primary cell wall biogenesis [GO:0009833];plasma membrane [GO:0005886];trans-Golgi network [GO:0005802]	29	17	699	79.5	8.57
1.84211	0.0143844	0.826082	I1MCZ5	LEA_2 domain-containing protein			NA	other membranes;plasma membrane	integral component of membrane [GO:0016021];plasma membrane [GO:0005886]	plasma membrane			NA	integral component of membrane [GO:0016021];plasma membrane [GO:0005886]	12	2	254	27.9	10.27
4.16495	6.83987e-05	0.822988	D4Q9Z4	Soyasapogenol B glucuronide galactosyltransferase			NA		intracellular membrane-bounded organelle [GO:0043231]	intracellular membrane-bounded organelle [GO:0043231]	other molecular function	quercetin 3-O-glucosyltransferase activity [GO:0080043];quercetin 7-O-glucosyltransferase activity [GO:0080044];soyasapogenol B glucuronide galactosyltransferase activity [GO:0102240];UDP-glycosyltransferase activity [GO:0008194]		intracellular membrane-bounded organelle [GO:0043231];quercetin 3-O-glucosyltransferase activity [GO:0080043];quercetin 7-O-glucosyltransferase activity [GO:0080044];soyasapogenol B glucuronide galactosyltransferase activity [GO:0102240];UDP-glycosyltransferase activity [GO:0008194]	59	23	495	55.8	6.13
3.37446	0.00042222	0.822384	I1JXR7	Exostosin domain-containing protein	other biological processes;other metabolic processes;protein metabolism	glucuronoxylan biosynthetic process [GO:0010417];plant-type secondary cell wall biogenesis [GO:0009834];protein glycosylation [GO:0006486]	protein metabolism	ER/Golgi;other membranes	Golgi apparatus [GO:0005794]	ER/Golgi	other molecular function	1,4-beta-D-xylan synthase activity [GO:0047517];glucuronoxylan glucuronosyltransferase activity [GO:0080116];transferase activity, transferring glycosyl groups [GO:0016757]	transferase activity	1,4-beta-D-xylan synthase activity [GO:0047517];glucuronoxylan biosynthetic process [GO:0010417];glucuronoxylan glucuronosyltransferase activity [GO:0080116];Golgi apparatus [GO:0005794];plant-type secondary cell wall biogenesis [GO:0009834];protein glycosylation [GO:0006486];transferase activity, transferring glycosyl groups [GO:0016757]	8	2	416	47.1	6.65
2.20925	0.00617657	0.820919	A0A0R0JWN2	YTH domain-containing protein			NA			NA	nucleic acid binding activity	RNA binding [GO:0003723]	RNA binding [GO:0003723]	RNA binding [GO:0003723]	22	13	673	73.6	6.25
2.08005	0.00831661	0.81641	I1NG47	Pyruvate kinase	other metabolic processes	cellular response to insulin stimulus [GO:0032869];glycolytic process [GO:0006096]	glycolytic process [GO:0006096]	other cell component	cytoplasm [GO:0005737]	cytoplasm [GO:0005737]	kinase activity;other molecular function	kinase activity [GO:0016301];magnesium ion binding [GO:0000287];potassium ion binding [GO:0030955];pyruvate kinase activity [GO:0004743]	kinase activity [GO:0016301]	cellular response to insulin stimulus [GO:0032869];cytoplasm [GO:0005737];glycolytic process [GO:0006096];kinase activity [GO:0016301];magnesium ion binding [GO:0000287];potassium ion binding [GO:0030955];pyruvate kinase activity [GO:0004743]	11	4	582	63.6	5.9
3.3059	0.000494419	0.813936	I1LIV5	Delta(24)-sterol reductase	other metabolic processes	steroid metabolic process [GO:0008202]	steroid metabolic process [GO:0008202]	other cell component;other membranes	cytoplasm [GO:0005737];integral component of membrane [GO:0016021];membrane [GO:0016020]	cytoplasm [GO:0005737]	other molecular function	FAD binding [GO:0071949];oxidoreductase activity, acting on the CH-CH group of donors, NAD or NADP as acceptor [GO:0016628]	FAD binding [GO:0071949]	cytoplasm [GO:0005737];FAD binding [GO:0071949];integral component of membrane [GO:0016021];membrane [GO:0016020];oxidoreductase activity, acting on the CH-CH group of donors, NAD or NADP as acceptor [GO:0016628];steroid metabolic process [GO:0008202]	48	23	567	66	8.21
2.27624	0.00529373	0.813581	C6SVL3	Phytocyanin domain-containing protein	other metabolic processes		other metabolic processes	other membranes;plasma membrane	integral component of membrane [GO:0016021]	plasma membrane	other molecular function	electron transfer activity [GO:0009055]	electron transfer activity [GO:0009055]	electron transfer activity [GO:0009055];integral component of membrane [GO:0016021]	16	2	178	19.3	6.93
4.01916	9.56835e-05	0.811914	I1LJP3	PfkB domain-containing protein	other metabolic processes	fructose metabolic process [GO:0006000]	fructose metabolic process [GO:0006000]	cytosol	cytosol [GO:0005829]	cytosol	kinase activity	carbohydrate kinase activity [GO:0019200];fructokinase activity [GO:0008865]	kinase activity	carbohydrate kinase activity [GO:0019200];cytosol [GO:0005829];fructokinase activity [GO:0008865];fructose metabolic process [GO:0006000]	64	19	331	35.4	5.11
3.21589	0.00060829	0.810243	I1K510	Uncharacterized protein	other metabolic processes		other metabolic processes	ER/Golgi;other cell component;other cytoplasmic organelle;other membranes	endosome [GO:0005768];integral component of membrane [GO:0016021];trans-Golgi network [GO:0005802]	ER/Golgi	other molecular function	methyltransferase activity [GO:0008168]	methyltransferase activity [GO:0008168]	endosome [GO:0005768];integral component of membrane [GO:0016021];methyltransferase activity [GO:0008168];trans-Golgi network [GO:0005802]	17	10	831	93.7	5.17
2.36203	0.00434482	0.809964	A0A0R0K7Q9	DUF4005 domain-containing protein			NA			NA			NA		16	7	727	79.4	5.33
1.38205	0.0414907	0.799101	I1MGL7	Uncharacterized protein	transport	transmembrane transport [GO:0055085]	transport	other cytoplasmic organelle;other membranes	integral component of membrane [GO:0016021];membrane [GO:0016020];plant-type vacuole [GO:0000325];vacuolar membrane [GO:0005774]	vacuolar	other molecular function;transporter activity	ATP binding [GO:0005524];ATPase activity [GO:0016887];ATPase-coupled transmembrane transporter activity [GO:0042626]	ATP binding [GO:0005524]	ATP binding [GO:0005524];ATPase activity [GO:0016887];ATPase-coupled transmembrane transporter activity [GO:0042626];integral component of membrane [GO:0016021];membrane [GO:0016020];plant-type vacuole [GO:0000325];transmembrane transport [GO:0055085];vacuolar membrane [GO:0005774]	8	8	1501	167.5	8.12
3.68342	0.000207293	0.797358	I1MHR0	S-adenosylmethionine synthase	other metabolic processes	one-carbon metabolic process [GO:0006730];S-adenosylmethionine biosynthetic process [GO:0006556]	NA	cytosol	cytosol [GO:0005829]	cytosol	other molecular function	ATP binding [GO:0005524];metal ion binding [GO:0046872];methionine adenosyltransferase activity [GO:0004478]	ATP binding [GO:0005524]	ATP binding [GO:0005524];cytosol [GO:0005829];metal ion binding [GO:0046872];methionine adenosyltransferase activity [GO:0004478];one-carbon metabolic process [GO:0006730];S-adenosylmethionine biosynthetic process [GO:0006556]	79	24	395	43	5.82
2.57269	0.0026749	0.797219	A0A0R0ESN9	Uncharacterized protein			NA			NA			NA		27	11	677	76.4	5.07
2.32851	0.00469344	0.795064	A0A0R0EIZ5	L-ascorbate oxidase			NA	non-structural extracellular;other cell component	extracellular region [GO:0005576]	non-structural extracellular	other molecular function	copper ion binding [GO:0005507];oxidoreductase activity [GO:0016491]	copper ion binding [GO:0005507]	copper ion binding [GO:0005507];extracellular region [GO:0005576];oxidoreductase activity [GO:0016491]	30	10	575	64.1	8.25
1.43498	0.0367303	0.794707	K7L8H9	Uncharacterized protein			NA			NA			NA		8	2	462	52.3	5.49
1.58862	0.0257858	0.79043	C6TCJ7	Uncharacterized protein	cell organization and biogenesis;transport	SRP-dependent cotranslational protein targeting to membrane, signal sequence recognition [GO:0006617]	cell organization and biogenesis	translational apparatus	signal recognition particle, endoplasmic reticulum targeting [GO:0005786]	translational apparatus	nucleic acid binding activity	7S RNA binding [GO:0008312]	7S RNA binding [GO:0008312]	7S RNA binding [GO:0008312];signal recognition particle, endoplasmic reticulum targeting [GO:0005786];SRP-dependent cotranslational protein targeting to membrane, signal sequence recognition [GO:0006617]	29	3	137	15.3	9.96
1.57938	0.0263405	0.788147	C6T165	Uncharacterized protein	other metabolic processes;transport	arachidonic acid secretion [GO:0050482];lipid catabolic process [GO:0016042];phospholipid metabolic process [GO:0006644]	transport	non-structural extracellular	extracellular region [GO:0005576]	non-structural extracellular	other molecular function	calcium ion binding [GO:0005509];phospholipase A2 activity [GO:0004623]	calcium ion binding [GO:0005509]	arachidonic acid secretion [GO:0050482];calcium ion binding [GO:0005509];extracellular region [GO:0005576];lipid catabolic process [GO:0016042];phospholipase A2 activity [GO:0004623];phospholipid metabolic process [GO:0006644]	24	2	156	17	7.09
1.88273	0.0130998	0.783182	A0A0R0G7B7	FAS1 domain-containing protein	other biological processes	plant-type secondary cell wall biogenesis [GO:0009834]	plant-type secondary cell wall biogenesis [GO:0009834]	other membranes;plasma membrane	plasma membrane [GO:0005886]	plasma membrane			NA	plant-type secondary cell wall biogenesis [GO:0009834];plasma membrane [GO:0005886]	8	2	256	27.2	5.29
2.13939	0.00725462	0.779592	I1N466	HABP4_PAI-RBP1 domain-containing protein			NA	nucleus;other cell component		nucleus	nucleic acid binding activity	RNA binding [GO:0003723]	RNA binding [GO:0003723]	RNA binding [GO:0003723]	38	9	370	39.9	6.3
1.72881	0.0186719	0.779533	A0A0R0GNM9	Uncharacterized protein			NA	ER/Golgi		ER/Golgi			NA		6	6	1200	130.9	6.38
4.07888	8.3391e-05	0.7795	I1JPW6	Uncharacterized protein	other metabolic processes;RNA metabolism OR transcription	mRNA splicing, via spliceosome [GO:0000398]	RNA metabolism OR transcription	nucleus	spliceosomal complex [GO:0005681];U2AF [GO:0089701]	nucleus	nucleic acid binding activity;other molecular function	metal ion binding [GO:0046872];pre-mRNA 3'-splice site binding [GO:0030628]	metal ion binding [GO:0046872]	metal ion binding [GO:0046872];mRNA splicing, via spliceosome [GO:0000398];pre-mRNA 3'-splice site binding [GO:0030628];spliceosomal complex [GO:0005681];U2AF [GO:0089701]	4	2	314	36.2	9.44
1.55514	0.0278523	0.779185	I1K657	RPN13_C domain-containing protein	other biological processes;other metabolic processes;protein metabolism	ubiquitin-dependent protein catabolic process [GO:0006511]	protein metabolism	nucleus;other cell component	cytoplasm [GO:0005737];nucleus [GO:0005634];proteasome regulatory particle, lid subcomplex [GO:0008541]	nucleus	enzyme regulator activity;other molecular function	endopeptidase activator activity [GO:0061133];proteasome binding [GO:0070628];ubiquitin binding [GO:0043130]	proteasome binding [GO:0070628]	cytoplasm [GO:0005737];endopeptidase activator activity [GO:0061133];nucleus [GO:0005634];proteasome binding [GO:0070628];proteasome regulatory particle, lid subcomplex [GO:0008541];ubiquitin binding [GO:0043130];ubiquitin-dependent protein catabolic process [GO:0006511]	41	6	321	36.1	4.44
2.42226	0.00378213	0.777828	A0A0R0KK81	Methyltransferase	other metabolic processes		other metabolic processes	other membranes	integral component of membrane [GO:0016021]	integral component of membrane [GO:0016021]	other molecular function	methyltransferase activity [GO:0008168]	methyltransferase activity [GO:0008168]	integral component of membrane [GO:0016021];methyltransferase activity [GO:0008168]	11	6	615	69.5	8.24
1.9939	0.0101414	0.777095	I1L1Y1	Uncharacterized protein			NA			NA			NA		15	2	195	22.5	5.43
2.84146	0.00144059	0.776113	I1J5J5	Uncharacterized protein			NA			NA			NA		22	7	446	48.8	5.14
3.04441	0.000902791	0.773605	Q9SWA8	Glycine-rich RNA-binding protein			NA			NA	nucleic acid binding activity	RNA binding [GO:0003723]	RNA binding [GO:0003723]	RNA binding [GO:0003723]	64	12	160	15.8	7.2
2.27364	0.00532551	0.773569	I1M5G8	Malic enzyme	other metabolic processes	malate metabolic process [GO:0006108];pyruvate metabolic process [GO:0006090]	malate metabolic process [GO:0006108]	other cell component	chloroplast [GO:0009507]	chloroplast [GO:0009507]	other molecular function	malate dehydrogenase (decarboxylating) (NAD+) activity [GO:0004471];malate dehydrogenase (decarboxylating) (NADP+) activity [GO:0004473];malic enzyme activity [GO:0004470];metal ion binding [GO:0046872];NAD binding [GO:0051287]	metal ion binding [GO:0046872]	chloroplast [GO:0009507];malate dehydrogenase (decarboxylating) (NAD+) activity [GO:0004471];malate dehydrogenase (decarboxylating) (NADP+) activity [GO:0004473];malate metabolic process [GO:0006108];malic enzyme activity [GO:0004470];metal ion binding [GO:0046872];NAD binding [GO:0051287];pyruvate metabolic process [GO:0006090]	37	13	647	71.3	7.55
2.87657	0.00132872	0.773525	A0A0R0LDW8	Epimerase domain-containing protein			NA			NA	other molecular function	coenzyme binding [GO:0050662];oxidoreductase activity [GO:0016491];oxidoreductase activity, acting on the CH-OH group of donors, NAD or NADP as acceptor [GO:0016616]	oxidoreductase activity [GO:0016491]	coenzyme binding [GO:0050662];oxidoreductase activity [GO:0016491];oxidoreductase activity, acting on the CH-OH group of donors, NAD or NADP as acceptor [GO:0016616]	21	3	319	35.5	6.18
1.61456	0.0242909	0.772226	I1MQT0	Dynamin GTPase	cell organization and biogenesis	mitochondrial fission [GO:0000266]	cell organization and biogenesis	cytoskeleton;other cell component;other membranes	cytoplasm [GO:0005737];membrane [GO:0016020]	cytoskeleton	cytoskeletal activity;other molecular function	GTP binding [GO:0005525];GTPase activity [GO:0003924];microtubule binding [GO:0008017]	GTP binding [GO:0005525]	cytoplasm [GO:0005737];GTP binding [GO:0005525];GTPase activity [GO:0003924];membrane [GO:0016020];microtubule binding [GO:0008017];mitochondrial fission [GO:0000266]	9	5	914	99.6	9.1
1.56518	0.0272159	0.771684	A0A0R0GJA9	Hexosyltransferase	cell organization and biogenesis;other metabolic processes	cell wall organization [GO:0071555];pectin biosynthetic process [GO:0045489]	cell organization and biogenesis	ER/Golgi;other membranes	Golgi membrane [GO:0000139];integral component of membrane [GO:0016021]	ER/Golgi	other molecular function	polygalacturonate 4-alpha-galacturonosyltransferase activity [GO:0047262]	polygalacturonate 4-alpha-galacturonosyltransferase activity [GO:0047262]	cell wall organization [GO:0071555];Golgi membrane [GO:0000139];integral component of membrane [GO:0016021];pectin biosynthetic process [GO:0045489];polygalacturonate 4-alpha-galacturonosyltransferase activity [GO:0047262]	3	2	552	63.2	8.19
2.74244	0.00180951	0.767027	I1LGX2	Helicase ATP-binding domain-containing protein	other metabolic processes;RNA metabolism OR transcription	nuclear-transcribed mRNA catabolic process, nonsense-mediated decay [GO:0000184]	RNA metabolism OR transcription	other cell component	cytoplasm [GO:0005737]	cytoplasm [GO:0005737]	nucleic acid binding activity;other molecular function	ATP binding [GO:0005524];DNA binding [GO:0003677];RNA binding [GO:0003723];RNA helicase activity [GO:0003724];zinc ion binding [GO:0008270]	ATP binding [GO:0005524]	ATP binding [GO:0005524];cytoplasm [GO:0005737];DNA binding [GO:0003677];nuclear-transcribed mRNA catabolic process, nonsense-mediated decay [GO:0000184];RNA binding [GO:0003723];RNA helicase activity [GO:0003724];zinc ion binding [GO:0008270]	6	4	1268	138.8	6.84
1.86444	0.0136636	0.763529	K7N361	Lipase	other metabolic processes	cellular lipid metabolic process [GO:0044255];lipid catabolic process [GO:0016042]	cellular lipid metabolic process [GO:0044255]			NA	other molecular function	lipase activity [GO:0016298]	lipase activity [GO:0016298]	cellular lipid metabolic process [GO:0044255];lipase activity [GO:0016298];lipid catabolic process [GO:0016042]	9	2	435	49.2	7.23
2.50667	0.00311407	0.76276	K7KHJ7	RRM domain-containing protein			NA	nucleus	ribonucleoprotein complex [GO:1990904]	nucleus	nucleic acid binding activity	RNA binding [GO:0003723]	RNA binding [GO:0003723]	ribonucleoprotein complex [GO:1990904];RNA binding [GO:0003723]	55	7	185	18	8.12
2.82763	0.00148722	0.75692	I1JJG3	Uncharacterized protein			NA		ribonucleoprotein complex [GO:1990904]	ribonucleoprotein complex [GO:1990904]	nucleic acid binding activity	mRNA binding [GO:0003729];RNA binding [GO:0003723]	mRNA binding [GO:0003729]	mRNA binding [GO:0003729];ribonucleoprotein complex [GO:1990904];RNA binding [GO:0003723]	6	2	477	50.3	7.52
2.23624	0.00580446	0.756647	I1MF99	Procollagen-proline 4-dioxygenase	other metabolic processes;protein metabolism	peptidyl-proline hydroxylation to 4-hydroxy-L-proline [GO:0018401]	protein metabolism	ER/Golgi;other membranes	endoplasmic reticulum [GO:0005783]	ER/Golgi	other molecular function	iron ion binding [GO:0005506];L-ascorbic acid binding [GO:0031418];oxidoreductase activity, acting on paired donors, with incorporation or reduction of molecular oxygen [GO:0016705]	iron ion binding [GO:0005506]	endoplasmic reticulum [GO:0005783];iron ion binding [GO:0005506];L-ascorbic acid binding [GO:0031418];oxidoreductase activity, acting on paired donors, with incorporation or reduction of molecular oxygen [GO:0016705];peptidyl-proline hydroxylation to 4-hydroxy-L-proline [GO:0018401]	16	4	301	33.2	6.18
2.05265	0.00885836	0.755754	A0A0R0JYS9	Peroxidase	other biological processes;other metabolic processes;stress response	hydrogen peroxide catabolic process [GO:0042744];response to oxidative stress [GO:0006979]	stress response	non-structural extracellular	extracellular region [GO:0005576]	non-structural extracellular	other molecular function	heme binding [GO:0020037];metal ion binding [GO:0046872];peroxidase activity [GO:0004601]	heme binding [GO:0020037]	extracellular region [GO:0005576];heme binding [GO:0020037];hydrogen peroxide catabolic process [GO:0042744];metal ion binding [GO:0046872];peroxidase activity [GO:0004601];response to oxidative stress [GO:0006979]	66	16	325	35.5	8.76
1.9331	0.0116653	0.750928	K7LX68	Protein disulfide-isomerase	other biological processes;stress response	cell redox homeostasis [GO:0045454];protein folding [GO:0006457];response to endoplasmic reticulum stress [GO:0034976]	stress response	ER/Golgi	endoplasmic reticulum [GO:0005783]	ER/Golgi	other molecular function	protein disulfide isomerase activity [GO:0003756]	protein disulfide isomerase activity [GO:0003756]	cell redox homeostasis [GO:0045454];endoplasmic reticulum [GO:0005783];protein disulfide isomerase activity [GO:0003756];protein folding [GO:0006457];response to endoplasmic reticulum stress [GO:0034976]	10	5	495	55.7	5.52
3.49563	0.000319423	0.750066	I1N4W1	PMR5N domain-containing protein			NA	ER/Golgi	Golgi apparatus [GO:0005794]	ER/Golgi	other molecular function	O-acetyltransferase activity [GO:0016413]	O-acetyltransferase activity [GO:0016413]	Golgi apparatus [GO:0005794];O-acetyltransferase activity [GO:0016413]	18	5	441	51.3	8.51
3.55423	0.000279109	0.747891	I1KCL1	Uncharacterized protein			NA	other membranes	integral component of membrane [GO:0016021]	integral component of membrane [GO:0016021]			NA	integral component of membrane [GO:0016021]	39	5	84	9.5	8.02
1.86051	0.0137875	0.747641	A0A0R0KKU3	Uncharacterized protein	other biological processes;stress response	cellular response to heat [GO:0034605];cellular response to unfolded protein [GO:0034620];chaperone cofactor-dependent protein refolding [GO:0051085];protein refolding [GO:0042026];response to unfolded protein [GO:0006986]	stress response	other cell component	cytoplasm [GO:0005737]	cytoplasm [GO:0005737]	other molecular function	ATP binding [GO:0005524];ATPase activity [GO:0016887];ATPase activity, coupled [GO:0042623];heat shock protein binding [GO:0031072];misfolded protein binding [GO:0051787];protein folding chaperone [GO:0044183];unfolded protein binding [GO:0051082]	ATP binding [GO:0005524]	ATP binding [GO:0005524];ATPase activity [GO:0016887];ATPase activity, coupled [GO:0042623];cellular response to heat [GO:0034605];cellular response to unfolded protein [GO:0034620];chaperone cofactor-dependent protein refolding [GO:0051085];cytoplasm [GO:0005737];heat shock protein binding [GO:0031072];misfolded protein binding [GO:0051787];protein folding chaperone [GO:0044183];protein refoldin…	72	41	653	71.4	5.16
2.41616	0.00383562	0.74746	I1KPM9	TPR_REGION domain-containing protein			NA			NA			NA		27	11	578	63.2	5.41
2.38758	0.00409659	0.746969	I1K7H8	HTH La-type RNA-binding domain-containing protein			NA			NA	nucleic acid binding activity	RNA binding [GO:0003723]	RNA binding [GO:0003723]	RNA binding [GO:0003723]	13	4	511	55.1	7.17
2.37107	0.0042553	0.745774	I1L6Y8	Protein kinase domain-containing protein	other metabolic processes;protein metabolism	protein autophosphorylation [GO:0046777]	protein metabolism	other cell component;other membranes;plasma membrane	integral component of membrane [GO:0016021];plasma membrane [GO:0005886];plasmodesma [GO:0009506]	plasma membrane	kinase activity;other molecular function	ATP binding [GO:0005524];protein kinase activity [GO:0004672]	ATP binding [GO:0005524]	ATP binding [GO:0005524];integral component of membrane [GO:0016021];plasma membrane [GO:0005886];plasmodesma [GO:0009506];protein autophosphorylation [GO:0046777];protein kinase activity [GO:0004672]	20	10	896	98	6.01
1.99187	0.0101889	0.745421	A0A368UGT8	Uncharacterized protein	other metabolic processes		other metabolic processes	other membranes		other membranes	other molecular function	hydrolase activity [GO:0016787]	hydrolase activity [GO:0016787]	hydrolase activity [GO:0016787]	28	8	463	50.4	5.14
2.37685	0.004199	0.742916	Q9AV94	Uncharacterized protein			NA	other membranes	integral component of membrane [GO:0016021]	integral component of membrane [GO:0016021]			NA	integral component of membrane [GO:0016021]	4	4	1351	149.1	4.37
2.54546	0.00284801	0.742405	C6TGL4	Secretory carrier-associated membrane protein	transport	protein transport [GO:0015031]	transport	ER/Golgi;other cytoplasmic organelle;other membranes;plasma membrane	Golgi apparatus [GO:0005794];Golgi membrane [GO:0000139];integral component of membrane [GO:0016021];plasma membrane [GO:0005886];recycling endosome membrane [GO:0055038];trans-Golgi network membrane [GO:0032588];transport vesicle membrane [GO:0030658]	ER/Golgi			NA	Golgi apparatus [GO:0005794];Golgi membrane [GO:0000139];integral component of membrane [GO:0016021];plasma membrane [GO:0005886];protein transport [GO:0015031];recycling endosome membrane [GO:0055038];trans-Golgi network membrane [GO:0032588];transport vesicle membrane [GO:0030658]	15	3	269	30.5	8.18
4.593	2.5527e-05	0.741288	C6TB45	Bet_v_1 domain-containing protein	stress response	defense response [GO:0006952]	stress response			NA			NA	defense response [GO:0006952]	26	4	155	17.6	6.52
1.51156	0.0307922	0.740935	I1NHB5	Dihydrolipoamide acetyltransferase component of pyruvate dehydrogenase complex			NA	other cell component		other cell component	other molecular function	transferase activity, transferring acyl groups [GO:0016746]	transferase activity, transferring acyl groups [GO:0016746]	transferase activity, transferring acyl groups [GO:0016746]	34	10	465	48.4	8.63
2.36189	0.00434624	0.740518	C6TI18	DUF4057 domain-containing protein			NA			NA			NA		11	2	280	29.9	5.8
3.25863	0.000551277	0.738744	I1LBD2	Uncharacterized protein			NA			NA			NA		14	2	196	22	5.21
1.80114	0.0158073	0.738331	A0A368ULJ0	GSDH domain-containing protein			NA	other membranes	integral component of membrane [GO:0016021]	integral component of membrane [GO:0016021]	other molecular function	catalytic activity [GO:0003824]	catalytic activity [GO:0003824]	catalytic activity [GO:0003824];integral component of membrane [GO:0016021]	8	4	674	73.1	5.27
1.75737	0.0174836	0.736084	I1L122	DNA helicase	cell cycle OR cell proliferation;cell organization and biogenesis;DNA metabolism;other metabolic processes;stress response	DNA replication initiation [GO:0006270];DNA unwinding involved in DNA replication [GO:0006268];double-strand break repair via break-induced replication [GO:0000727];mitotic DNA replication [GO:1902969];pre-replicative complex assembly involved in nuclear cell cycle DNA replication [GO:0006267]	DNA metabolism	nucleus;other cell component	MCM complex [GO:0042555];nucleus [GO:0005634]	nucleus	nucleic acid binding activity;other molecular function	ATP binding [GO:0005524];DNA helicase activity [GO:0003678];DNA replication origin binding [GO:0003688];single-stranded DNA binding [GO:0003697]	ATP binding [GO:0005524]	ATP binding [GO:0005524];DNA helicase activity [GO:0003678];DNA replication initiation [GO:0006270];DNA replication origin binding [GO:0003688];DNA unwinding involved in DNA replication [GO:0006268];double-strand break repair via break-induced replication [GO:0000727];MCM complex [GO:0042555];mitotic DNA replication [GO:1902969];nucleus [GO:0005634];pre-replicative complex assembly involved in nu…	6	4	862	95.6	6.01
2.10763	0.00780495	0.732015	A0A0R0JXG8	Flavin-containing monooxygenase			NA			NA	other molecular function	flavin adenine dinucleotide binding [GO:0050660];monooxygenase activity [GO:0004497];N,N-dimethylaniline monooxygenase activity [GO:0004499];NADP binding [GO:0050661]	NADP binding [GO:0050661]	flavin adenine dinucleotide binding [GO:0050660];monooxygenase activity [GO:0004497];N,N-dimethylaniline monooxygenase activity [GO:0004499];NADP binding [GO:0050661]	14	4	461	52.8	6.1
2.23054	0.00588115	0.731434	I1KFE9	Uncharacterized protein			NA			NA	other molecular function	copper ion binding [GO:0005507];oxidoreductase activity [GO:0016491]	copper ion binding [GO:0005507]	copper ion binding [GO:0005507];oxidoreductase activity [GO:0016491]	15	5	537	60.1	7.77
1.81045	0.0154721	0.730951	I1MU50	ENTH domain-containing protein	cell organization and biogenesis;transport	clathrin coat assembly [GO:0048268];clathrin-dependent endocytosis [GO:0072583];endocytosis [GO:0006897];vesicle budding from membrane [GO:0006900]	cell organization and biogenesis	ER/Golgi;other cell component;other membranes;plasma membrane	clathrin-coated pit [GO:0005905];clathrin-coated vesicle [GO:0030136];plasma membrane [GO:0005886]	plasma membrane	other molecular function	1-phosphatidylinositol binding [GO:0005545];clathrin heavy chain binding [GO:0032050];phosphatidylinositol-4,5-bisphosphate binding [GO:0005546];SNARE binding [GO:0000149]	NA	1-phosphatidylinositol binding [GO:0005545];clathrin coat assembly [GO:0048268];clathrin heavy chain binding [GO:0032050];clathrin-coated pit [GO:0005905];clathrin-coated vesicle [GO:0030136];clathrin-dependent endocytosis [GO:0072583];endocytosis [GO:0006897];phosphatidylinositol-4,5-bisphosphate binding [GO:0005546];plasma membrane [GO:0005886];SNARE binding [GO:0000149];vesicle budding from me…	22	6	548	60.8	6.29
1.49544	0.0319567	0.729601	K7L123	UMP-CMP kinase	other metabolic processes	'de novo' pyrimidine nucleobase biosynthetic process [GO:0006207];pyrimidine nucleotide biosynthetic process [GO:0006221]	NA	nucleus;other cell component	cytoplasm [GO:0005737];nucleus [GO:0005634]	nucleus	kinase activity;other molecular function	ATP binding [GO:0005524];cytidylate kinase activity [GO:0004127];uridylate kinase activity [GO:0009041]	ATP binding [GO:0005524]	ATP binding [GO:0005524];cytidylate kinase activity [GO:0004127];cytoplasm [GO:0005737];'de novo' pyrimidine nucleobase biosynthetic process [GO:0006207];nucleus [GO:0005634];pyrimidine nucleotide biosynthetic process [GO:0006221];uridylate kinase activity [GO:0009041]	43	7	207	22.9	5.55
2.31348	0.00485873	0.72932	K7LP97	RRM domain-containing protein			NA	nucleus	ribonucleoprotein complex [GO:1990904]	nucleus	nucleic acid binding activity	RNA binding [GO:0003723]	RNA binding [GO:0003723]	ribonucleoprotein complex [GO:1990904];RNA binding [GO:0003723]	35	5	170	16.9	8.12
1.73585	0.0183717	0.727429	A0A0R4J2X1	Uncharacterized protein	other metabolic processes	lipid metabolic process [GO:0006629]	lipid metabolic process [GO:0006629]	other membranes	integral component of membrane [GO:0016021]	integral component of membrane [GO:0016021]	other molecular function	oxidoreductase activity, acting on paired donors, with oxidation of a pair of donors resulting in the reduction of molecular oxygen to two molecules of water [GO:0016717]	oxidoreductase activity, acting on paired donors, with oxidation of a pair of donors resulting in the reduction of molecular oxygen to two molecules of water [GO:0016717]	integral component of membrane [GO:0016021];lipid metabolic process [GO:0006629];oxidoreductase activity, acting on paired donors, with oxidation of a pair of donors resulting in the reduction of molecular oxygen to two molecules of water [GO:0016717]	8	2	383	44	8.34
2.17045	0.00675388	0.72442	I1L546	NmrA domain-containing protein			NA			NA	other molecular function		other molecular function		10	2	318	35.6	6.62
3.12122	0.000756457	0.723798	I1KBS7	Uncharacterized protein	cell cycle OR cell proliferation;other biological processes		cell cycle OR cell proliferation			NA	other molecular function		other molecular function		27	9	557	62.5	4.86
1.86497	0.0136469	0.72377	C6SXT8	Pre-mRNA cleavage factor Im 25 kDa subunit	other metabolic processes;RNA metabolism OR transcription	mRNA polyadenylation [GO:0006378];mRNA processing [GO:0006397]	RNA metabolism OR transcription	nucleus;other cell component	mRNA cleavage factor complex [GO:0005849]	nucleus	nucleic acid binding activity;other molecular function	AU-rich element binding [GO:0017091];hydrolase activity [GO:0016787];mRNA binding [GO:0003729]	mRNA binding [GO:0003729]	AU-rich element binding [GO:0017091];hydrolase activity [GO:0016787];mRNA binding [GO:0003729];mRNA cleavage factor complex [GO:0005849];mRNA polyadenylation [GO:0006378];mRNA processing [GO:0006397]	25	4	200	23	9.23
1.54539	0.0284848	0.719164	I1JA26	3-hydroxy-3-methylglutaryl coenzyme A synthase	other metabolic processes	acetyl-CoA metabolic process [GO:0006084];farnesyl diphosphate biosynthetic process, mevalonate pathway [GO:0010142];sterol biosynthetic process [GO:0016126]	NA			NA	other molecular function	hydroxymethylglutaryl-CoA synthase activity [GO:0004421]	hydroxymethylglutaryl-CoA synthase activity [GO:0004421]	acetyl-CoA metabolic process [GO:0006084];farnesyl diphosphate biosynthetic process, mevalonate pathway [GO:0010142];hydroxymethylglutaryl-CoA synthase activity [GO:0004421];sterol biosynthetic process [GO:0016126]	42	12	471	52.2	6.65
2.26117	0.00548063	0.719123	A0A0R0EQP6	Peroxidase	other biological processes;other metabolic processes;stress response	hydrogen peroxide catabolic process [GO:0042744];response to oxidative stress [GO:0006979]	stress response	non-structural extracellular;other cell component;other membranes	extracellular region [GO:0005576];integral component of membrane [GO:0016021];plant-type cell wall [GO:0009505];plasmodesma [GO:0009506]	non-structural extracellular	other molecular function	heme binding [GO:0020037];metal ion binding [GO:0046872];peroxidase activity [GO:0004601]	heme binding [GO:0020037]	extracellular region [GO:0005576];heme binding [GO:0020037];hydrogen peroxide catabolic process [GO:0042744];integral component of membrane [GO:0016021];metal ion binding [GO:0046872];peroxidase activity [GO:0004601];plant-type cell wall [GO:0009505];plasmodesma [GO:0009506];response to oxidative stress [GO:0006979]	7	2	327	36.3	6.76
2.46502	0.00342755	0.718919	I1MSX9	NAD(P)-bd_dom domain-containing protein			NA	other membranes	integral component of membrane [GO:0016021]	integral component of membrane [GO:0016021]			NA	integral component of membrane [GO:0016021]	16	4	431	47.6	9.44
2.14436	0.00717203	0.718076	I1KL58	Costars domain-containing protein	other biological processes	regulation of actin filament-based process [GO:0032970]	regulation of actin filament-based process [GO:0032970]			NA			NA	regulation of actin filament-based process [GO:0032970]	37	2	90	9.8	4.97
1.39821	0.0399752	0.716979	C6T8V3	UDP-glucose 6-dehydrogenase	other metabolic processes		other metabolic processes			NA	other molecular function	NAD binding [GO:0051287];UDP-glucose 6-dehydrogenase activity [GO:0003979]	NAD binding [GO:0051287]	NAD binding [GO:0051287];UDP-glucose 6-dehydrogenase activity [GO:0003979]	45	13	468	51.6	6.79
1.49649	0.0318792	0.716735	I1JGB5	Eukaryotic translation initiation factor 3 subunit E	cell organization and biogenesis;other metabolic processes;protein metabolism	formation of cytoplasmic translation initiation complex [GO:0001732];translational initiation [GO:0006413]	cell organization and biogenesis	nucleus;other cell component;translational apparatus	eukaryotic 43S preinitiation complex [GO:0016282];eukaryotic 48S preinitiation complex [GO:0033290];eukaryotic translation initiation factor 3 complex [GO:0005852];eukaryotic translation initiation factor 3 complex, eIF3e [GO:0071540];nucleus [GO:0005634]	nucleus	nucleic acid binding activity	translation initiation factor activity [GO:0003743]	nucleic acid binding activity	eukaryotic 43S preinitiation complex [GO:0016282];eukaryotic 48S preinitiation complex [GO:0033290];eukaryotic translation initiation factor 3 complex [GO:0005852];eukaryotic translation initiation factor 3 complex, eIF3e [GO:0071540];formation of cytoplasmic translation initiation complex [GO:0001732];nucleus [GO:0005634];translation initiation factor activity [GO:0003743];translational initiati…	65	25	437	51.1	5.82
2.37717	0.00419596	0.716395	A0A0R0JRI6	Fe2OG dioxygenase domain-containing protein			NA			NA	other molecular function	dioxygenase activity [GO:0051213];metal ion binding [GO:0046872]	metal ion binding [GO:0046872]	dioxygenase activity [GO:0051213];metal ion binding [GO:0046872]	24	4	318	35.9	5.43
1.46707	0.0341137	0.71497	I1J730	Peptidylprolyl isomerase	developmental processes;other biological processes;other metabolic processes;protein metabolism	cell differentiation [GO:0030154];chaperone-mediated protein folding [GO:0061077];plant organ development [GO:0099402];protein peptidyl-prolyl isomerization [GO:0000413];very long-chain fatty acid biosynthetic process [GO:0042761]	developmental processes	other cell component	cytoplasm [GO:0005737]	cytoplasm [GO:0005737]	other molecular function	peptidyl-prolyl cis-trans isomerase activity [GO:0003755]	peptidyl-prolyl cis-trans isomerase activity [GO:0003755]	cell differentiation [GO:0030154];chaperone-mediated protein folding [GO:0061077];cytoplasm [GO:0005737];peptidyl-prolyl cis-trans isomerase activity [GO:0003755];plant organ development [GO:0099402];protein peptidyl-prolyl isomerization [GO:0000413];very long-chain fatty acid biosynthetic process [GO:0042761]	9	4	622	69.9	5.57
2.19623	0.00636457	0.714209	A0A0R0HHC1	Uncharacterized protein		regulation of proton transport [GO:0010155]	regulation of proton transport [GO:0010155]	other membranes	endoplasmic reticulum [GO:0005783];integral component of membrane [GO:0016021];plasma membrane [GO:0005886]	endoplasmic reticulum [GO:0005783]			NA	endoplasmic reticulum [GO:0005783];integral component of membrane [GO:0016021];plasma membrane [GO:0005886];regulation of proton transport [GO:0010155]	32	17	622	70.1	9.11
3.08887	0.00081494	0.710807	I1M3D5	Arf-GAP domain-containing protein			NA			NA	enzyme regulator activity	GTPase activator activity [GO:0005096];metal ion binding [GO:0046872]	metal ion binding [GO:0046872]	GTPase activator activity [GO:0005096];metal ion binding [GO:0046872]	12	4	481	52.3	8.43
3.16864	0.000678204	0.706587	I1KAV2	Uncharacterized protein			NA			NA	other molecular function	fatty-acyl-CoA binding [GO:0000062]	fatty-acyl-CoA binding [GO:0000062]	fatty-acyl-CoA binding [GO:0000062]	18	5	354	38.8	4.64
1.60774	0.0246753	0.702502	I1M0I4	Uncharacterized protein	protein metabolism		protein metabolism			NA	other molecular function	serine-type endopeptidase activity [GO:0004252]	serine-type endopeptidase activity [GO:0004252]	serine-type endopeptidase activity [GO:0004252]	5	2	778	83.9	8.44
4.18334	6.55635e-05	0.701603	Q2LAJ5	Cytochrome P450 monooxygenase CYP74A1			NA			NA	other molecular function	heme binding [GO:0020037];iron ion binding [GO:0005506];monooxygenase activity [GO:0004497];oxidoreductase activity, acting on paired donors, with incorporation or reduction of molecular oxygen [GO:0016705]	heme binding [GO:0020037]	heme binding [GO:0020037];iron ion binding [GO:0005506];monooxygenase activity [GO:0004497];oxidoreductase activity, acting on paired donors, with incorporation or reduction of molecular oxygen [GO:0016705]	56	20	487	54.8	8.12
2.36573	0.00430793	0.699625	C6TNI1	t-SNARE coiled-coil homology domain-containing protein	cell organization and biogenesis;transport	Golgi vesicle transport [GO:0048193];intracellular protein transport [GO:0006886];vesicle docking [GO:0048278];vesicle fusion [GO:0006906]	cell organization and biogenesis	ER/Golgi;other cell component;other membranes	endomembrane system [GO:0012505];integral component of membrane [GO:0016021];SNARE complex [GO:0031201]	ER/Golgi	other molecular function	SNAP receptor activity [GO:0005484];SNARE binding [GO:0000149]	SNARE binding [GO:0000149]	endomembrane system [GO:0012505];Golgi vesicle transport [GO:0048193];integral component of membrane [GO:0016021];intracellular protein transport [GO:0006886];SNAP receptor activity [GO:0005484];SNARE binding [GO:0000149];SNARE complex [GO:0031201];vesicle docking [GO:0048278];vesicle fusion [GO:0006906]	5	2	242	27.3	5.05
1.62276	0.0238361	0.699233	C6T0C7	Uncharacterized protein	other biological processes		other biological processes			NA	enzyme regulator activity	endopeptidase inhibitor activity [GO:0004866]	enzyme regulator activity	endopeptidase inhibitor activity [GO:0004866]	45	7	212	23.4	4.96
1.90612	0.0124131	0.696638	I1L071	Hexosyltransferase	cell organization and biogenesis;other metabolic processes	cell wall organization [GO:0071555];pectin biosynthetic process [GO:0045489]	cell organization and biogenesis	ER/Golgi;other membranes	Golgi membrane [GO:0000139]	ER/Golgi	other molecular function	polygalacturonate 4-alpha-galacturonosyltransferase activity [GO:0047262]	polygalacturonate 4-alpha-galacturonosyltransferase activity [GO:0047262]	cell wall organization [GO:0071555];Golgi membrane [GO:0000139];pectin biosynthetic process [GO:0045489];polygalacturonate 4-alpha-galacturonosyltransferase activity [GO:0047262]	4	2	657	75.3	7.68
1.39216	0.0405358	0.695748	I1KKG3	Uncharacterized protein	other metabolic processes	carbohydrate metabolic process [GO:0005975]	carbohydrate metabolic process [GO:0005975]			NA	other molecular function	beta-glucosidase activity [GO:0008422]	beta-glucosidase activity [GO:0008422]	beta-glucosidase activity [GO:0008422];carbohydrate metabolic process [GO:0005975]	8	4	512	58.3	6.6
3.99874	0.00010029	0.695186	C6TE19	Alba domain-containing protein			NA			NA	nucleic acid binding activity	nucleic acid binding [GO:0003676]	nucleic acid binding [GO:0003676]	nucleic acid binding [GO:0003676]	35	5	249	27.4	10.33
1.78942	0.0162398	0.693872	C6TMX0	Xyloglucan endotransglucosylase/hydrolase	cell organization and biogenesis;other biological processes;other metabolic processes	cell wall biogenesis [GO:0042546];cell wall organization [GO:0071555];xyloglucan metabolic process [GO:0010411]	cell organization and biogenesis	non-structural extracellular;other cell component	apoplast [GO:0048046];cell wall [GO:0005618]	non-structural extracellular	other molecular function	hydrolase activity, hydrolyzing O-glycosyl compounds [GO:0004553];xyloglucan:xyloglucosyl transferase activity [GO:0016762]	hydrolase activity	apoplast [GO:0048046];cell wall [GO:0005618];cell wall biogenesis [GO:0042546];cell wall organization [GO:0071555];hydrolase activity, hydrolyzing O-glycosyl compounds [GO:0004553];xyloglucan metabolic process [GO:0010411];xyloglucan:xyloglucosyl transferase activity [GO:0016762]	21	5	295	34.4	8.95
4.78064	1.65715e-05	0.68959	K7MH03	Uncharacterized protein			NA			NA	nucleic acid binding activity;other molecular function	nucleic acid binding [GO:0003676];zinc ion binding [GO:0008270]	zinc ion binding [GO:0008270]	nucleic acid binding [GO:0003676];zinc ion binding [GO:0008270]	30	4	250	24.7	7.49
1.34044	0.0456627	0.688847	I1M6Z7	PH domain-containing protein	other metabolic processes;protein metabolism;signal transduction	intracellular signal transduction [GO:0035556];peptidyl-serine phosphorylation [GO:0018105]	signal transduction			NA	kinase activity	protein serine/threonine kinase activity [GO:0004674]	kinase activity	intracellular signal transduction [GO:0035556];peptidyl-serine phosphorylation [GO:0018105];protein serine/threonine kinase activity [GO:0004674]	14	3	490	54.3	5.8
2.28682	0.00516634	0.686573	K7KUU1	Uncharacterized protein	other biological processes		other biological processes	nucleus;other cell component		nucleus	nucleic acid binding activity	RNA binding [GO:0003723]	RNA binding [GO:0003723]	RNA binding [GO:0003723]	4	2	647	71	5.86
2.31523	0.00483914	0.686214	I1LW99	Uncharacterized protein		mRNA splicing, via spliceosome [GO:0000398]	mRNA splicing, via spliceosome [GO:0000398]	nucleus;other cell component	Prp19 complex [GO:0000974];U2-type catalytic step 1 spliceosome [GO:0071006];U2-type catalytic step 2 spliceosome [GO:0071007]	nucleus	nucleic acid binding activity;other molecular function	metal ion binding [GO:0046872];pre-mRNA binding [GO:0036002];U6 snRNA binding [GO:0017070]	metal ion binding [GO:0046872]	metal ion binding [GO:0046872];mRNA splicing, via spliceosome [GO:0000398];pre-mRNA binding [GO:0036002];Prp19 complex [GO:0000974];U2-type catalytic step 1 spliceosome [GO:0071006];U2-type catalytic step 2 spliceosome [GO:0071007];U6 snRNA binding [GO:0017070]	11	4	467	52.7	7.47
2.72192	0.00189707	0.684969	I1KTG8	Uncharacterized protein	other metabolic processes;transport	nucleotide-sugar metabolic process [GO:0009225]	transport			NA	other molecular function	dTDP-glucose 4,6-dehydratase activity [GO:0008460]	dTDP-glucose 4,6-dehydratase activity [GO:0008460]	dTDP-glucose 4,6-dehydratase activity [GO:0008460];nucleotide-sugar metabolic process [GO:0009225]	23	12	668	75.3	6.98
4.05409	8.82903e-05	0.6847	A0A0R0IAH0	Plasma membrane ATPase	other biological processes;transport	proton export across plasma membrane [GO:0120029]	transport	other membranes;plasma membrane	integral component of membrane [GO:0016021];plasma membrane [GO:0005886]	plasma membrane	other molecular function;transporter activity	ATP binding [GO:0005524];proton-exporting ATPase activity, phosphorylative mechanism [GO:0008553]	ATP binding [GO:0005524]	ATP binding [GO:0005524];integral component of membrane [GO:0016021];plasma membrane [GO:0005886];proton export across plasma membrane [GO:0120029];proton-exporting ATPase activity, phosphorylative mechanism [GO:0008553]	41	35	1017	112.4	6.42
3.19905	0.000632341	0.683331	C6SVZ6	AAI domain-containing protein	stress response	systemic acquired resistance [GO:0009627]	stress response			NA	other molecular function	fatty acid binding [GO:0005504]	fatty acid binding [GO:0005504]	fatty acid binding [GO:0005504];systemic acquired resistance [GO:0009627]	47	3	120	12.4	7.96
2.15467	0.00700368	0.680527	I1MGL0	Uncharacterized protein			NA			NA			NA		42	5	143	16.3	4.94
2.51367	0.0030643	0.679376	I1K1R5	Ribosomal_TL5_C domain-containing protein	other metabolic processes;protein metabolism	translation [GO:0006412]	protein metabolism	cytosol;translational apparatus	cytosolic large ribosomal subunit [GO:0022625]	cytosol	nucleic acid binding activity;other molecular function	5S rRNA binding [GO:0008097];structural constituent of ribosome [GO:0003735]	nucleic acid binding activity	5S rRNA binding [GO:0008097];cytosolic large ribosomal subunit [GO:0022625];structural constituent of ribosome [GO:0003735];translation [GO:0006412]	22	4	246	27.1	8.79
2.19745	0.00634671	0.678916	A0A0R4J3H1	Uncharacterized protein	cell organization and biogenesis	nucleosome assembly [GO:0006334]	cell organization and biogenesis	nucleus	nucleus [GO:0005634]	nucleus			NA	nucleosome assembly [GO:0006334];nucleus [GO:0005634]	53	9	263	30.4	4.32
3.74793	0.000178679	0.678063	I1LVI3	Dynamin GTPase	cell organization and biogenesis	mitochondrial fission [GO:0000266]	cell organization and biogenesis	cytoskeleton;other cell component;other membranes	cytoplasm [GO:0005737];membrane [GO:0016020]	cytoskeleton	cytoskeletal activity;other molecular function	GTP binding [GO:0005525];GTPase activity [GO:0003924];microtubule binding [GO:0008017]	GTP binding [GO:0005525]	cytoplasm [GO:0005737];GTP binding [GO:0005525];GTPase activity [GO:0003924];membrane [GO:0016020];microtubule binding [GO:0008017];mitochondrial fission [GO:0000266]	19	14	922	100.1	9.07
2.47464	0.00335244	0.677861	I1M6N8	Aspartate carbamoyltransferase	other metabolic processes	cellular amino acid metabolic process [GO:0006520];'de novo' pyrimidine nucleobase biosynthetic process [GO:0006207];nitrogen compound metabolic process [GO:0006807]	amino acid metabolic process [GO:0006520]	cytosol;other cell component	cytoplasm [GO:0005737];cytosol [GO:0005829]	cytosol	other molecular function	amino acid binding [GO:0016597];aspartate carbamoyltransferase activity [GO:0004070]	amino acid binding [GO:0016597]	amino acid binding [GO:0016597];aspartate carbamoyltransferase activity [GO:0004070];cellular amino acid metabolic process [GO:0006520];cytoplasm [GO:0005737];cytosol [GO:0005829];'de novo' pyrimidine nucleobase biosynthetic process [GO:0006207];nitrogen compound metabolic process [GO:0006807]	14	4	391	43.8	7.87
2.69675	0.00201027	0.677676	I1LD65	Dihydrolipoamide acetyltransferase component of pyruvate dehydrogenase complex			NA	other cell component		other cell component	other molecular function	transferase activity, transferring acyl groups [GO:0016746]	transferase activity, transferring acyl groups [GO:0016746]	transferase activity, transferring acyl groups [GO:0016746]	41	11	469	48.9	8.82
1.87922	0.0132063	0.675192	A0A0R0JQ57	Fucosyltransferase	cell organization and biogenesis;other metabolic processes	cell wall biogenesis [GO:0042546]	cell organization and biogenesis	ER/Golgi;other membranes	integral component of membrane [GO:0016021]	ER/Golgi	other molecular function	galactoside 2-alpha-L-fucosyltransferase activity [GO:0008107]	galactoside 2-alpha-L-fucosyltransferase activity [GO:0008107]	cell wall biogenesis [GO:0042546];galactoside 2-alpha-L-fucosyltransferase activity [GO:0008107];integral component of membrane [GO:0016021]	6	2	581	65.9	6.3
1.76228	0.0172869	0.674694	K7KI34	Calcium-transporting ATPase	developmental processes;other biological processes;transport	calcium ion transmembrane transport [GO:0070588];cellular calcium ion homeostasis [GO:0006874];manganese ion homeostasis [GO:0055071];root development [GO:0048364]	developmental processes	ER/Golgi;other cytoplasmic organelle;other membranes	endosome [GO:0005768];integral component of membrane [GO:0016021];trans-Golgi network [GO:0005802]	ER/Golgi	other molecular function;transporter activity	ATP binding [GO:0005524];calcium transmembrane transporter activity, phosphorylative mechanism [GO:0005388];manganese transmembrane transporter activity, phosphorylative mechanism [GO:0015410];proton-exporting ATPase activity, phosphorylative mechanism [GO:0008553]	ATP binding [GO:0005524]	ATP binding [GO:0005524];calcium ion transmembrane transport [GO:0070588];calcium transmembrane transporter activity, phosphorylative mechanism [GO:0005388];cellular calcium ion homeostasis [GO:0006874];endosome [GO:0005768];integral component of membrane [GO:0016021];manganese ion homeostasis [GO:0055071];manganese transmembrane transporter activity, phosphorylative mechanism [GO:0015410];proton…	8	4	1001	109.8	5.97
1.79514	0.0160274	0.672873	I1LAY3	Uncharacterized protein			NA			NA			NA		51	25	930	101.4	4.25
1.67269	0.0212475	0.672098	K7LRU7	SAP domain-containing protein			NA			NA	nucleic acid binding activity	nucleic acid binding [GO:0003676]	nucleic acid binding [GO:0003676]	nucleic acid binding [GO:0003676]	11	6	704	77.7	4.89
1.58313	0.026114	0.669648	A0A0R0J569	Uncharacterized protein			NA			NA	nucleic acid binding activity	mRNA binding [GO:0003729]	mRNA binding [GO:0003729]	mRNA binding [GO:0003729]	20	4	422	46	7.78
3.43946	0.000363531	0.668803	I1KT65	C2 domain-containing protein	other biological processes		other biological processes	other cell component		other cell component	cytoskeletal activity		cytoskeletal activity		26	34	2151	229.3	5.35
1.71159	0.0194274	0.668175	A0A0R4J645	Uncharacterized protein	other metabolic processes	aromatic compound biosynthetic process [GO:0019438]	aromatic compound biosynthetic process [GO:0019438]		cytosol [GO:0005829]	cytosol [GO:0005829]	other molecular function	O-methyltransferase activity [GO:0008171];protein dimerization activity [GO:0046983];S-adenosylmethionine-dependent methyltransferase activity [GO:0008757]	NA	aromatic compound biosynthetic process [GO:0019438];cytosol [GO:0005829];O-methyltransferase activity [GO:0008171];protein dimerization activity [GO:0046983];S-adenosylmethionine-dependent methyltransferase activity [GO:0008757]	15	4	372	41.6	5.45
1.94707	0.0112961	0.667678	A0A0R0HSV1	KH type-2 domain-containing protein	other metabolic processes;protein metabolism	DNA repair [GO:0006281];positive regulation of DNA repair [GO:0045739];translation [GO:0006412]	protein metabolism	cytosol;nucleus;translational apparatus	cytosolic small ribosomal subunit [GO:0022627];nucleus [GO:0005634]	cytosol	nucleic acid binding activity;other molecular function	damaged DNA binding [GO:0003684];DNA-(apurinic or apyrimidinic site) endonuclease activity [GO:0003906];oxidized purine DNA binding [GO:0032357];oxidized purine nucleobase lesion DNA N-glycosylase activity [GO:0008534];RNA binding [GO:0003723];structural constituent of ribosome [GO:0003735]	RNA binding [GO:0003723]	cytosolic small ribosomal subunit [GO:0022627];damaged DNA binding [GO:0003684];DNA repair [GO:0006281];DNA-(apurinic or apyrimidinic site) endonuclease activity [GO:0003906];nucleus [GO:0005634];oxidized purine DNA binding [GO:0032357];oxidized purine nucleobase lesion DNA N-glycosylase activity [GO:0008534];positive regulation of DNA repair [GO:0045739];RNA binding [GO:0003723];structural const…	71	17	239	26.6	9.64
2.49313	0.00321267	0.667459	I1NET6	Uncharacterized protein			NA			NA			NA		41	20	752	82	4.37
1.55136	0.0280955	0.66373	C6T458	Uncharacterized protein			NA			NA	other molecular function	calcium ion binding [GO:0005509]	calcium ion binding [GO:0005509]	calcium ion binding [GO:0005509]	14	3	213	24.4	4.88
3.55111	0.000281118	0.663616	C6T0G4	UMP-CMP kinase	other metabolic processes	'de novo' pyrimidine nucleobase biosynthetic process [GO:0006207];pyrimidine nucleotide biosynthetic process [GO:0006221]	NA	nucleus;other cell component	cytoplasm [GO:0005737];nucleus [GO:0005634]	nucleus	kinase activity;other molecular function	ATP binding [GO:0005524];cytidylate kinase activity [GO:0004127];uridylate kinase activity [GO:0009041]	ATP binding [GO:0005524]	ATP binding [GO:0005524];cytidylate kinase activity [GO:0004127];cytoplasm [GO:0005737];'de novo' pyrimidine nucleobase biosynthetic process [GO:0006207];nucleus [GO:0005634];pyrimidine nucleotide biosynthetic process [GO:0006221];uridylate kinase activity [GO:0009041]	55	9	207	23	5.39
2.13441	0.00733826	0.663275	I1KSC1	Uncharacterized protein			NA	ER/Golgi;other membranes	Golgi apparatus [GO:0005794];integral component of membrane [GO:0016021]	ER/Golgi			NA	Golgi apparatus [GO:0005794];integral component of membrane [GO:0016021]	6	3	575	66.5	8.19
2.00746	0.00982967	0.663269	I1NIH4	Uncharacterized protein			NA			NA			NA		29	8	528	58.5	4.97
2.01914	0.00956886	0.659094	C6T2Q2	7,8-dihydroneopterin aldolase	other metabolic processes	folic acid biosynthetic process [GO:0046656];tetrahydrofolate biosynthetic process [GO:0046654]	NA			NA	other molecular function	dihydroneopterin aldolase activity [GO:0004150]	dihydroneopterin aldolase activity [GO:0004150]	dihydroneopterin aldolase activity [GO:0004150];folic acid biosynthetic process [GO:0046656];tetrahydrofolate biosynthetic process [GO:0046654]	27	2	132	14.7	6.09
2.8411	0.00144178	0.657397	I1L9T0	Methyltransferase	other metabolic processes	sterol biosynthetic process [GO:0016126]	sterol biosynthetic process [GO:0016126]	ER/Golgi	endoplasmic reticulum [GO:0005783]	ER/Golgi	other molecular function	S-adenosylmethionine-dependent methyltransferase activity [GO:0008757];sterol 24-C-methyltransferase activity [GO:0003838]	NA	endoplasmic reticulum [GO:0005783];S-adenosylmethionine-dependent methyltransferase activity [GO:0008757];sterol 24-C-methyltransferase activity [GO:0003838];sterol biosynthetic process [GO:0016126]	37	12	340	38.6	6.65
2.05674	0.00877532	0.656898	C6TDN0	Phytocyanin domain-containing protein	other metabolic processes		other metabolic processes			NA	other molecular function	electron transfer activity [GO:0009055]	electron transfer activity [GO:0009055]	electron transfer activity [GO:0009055]	16	2	208	22.3	6.9
2.65274	0.00222465	0.656834	I1KB26	NAC-A/B domain-containing protein	transport		transport	other cell component;translational apparatus	nascent polypeptide-associated complex [GO:0005854]	translational apparatus	other molecular function		other molecular function	nascent polypeptide-associated complex [GO:0005854]	55	7	225	24.4	4.54
1.67069	0.0213456	0.656771	A0A0R0JTV5	Elongation factor 1-alpha	other metabolic processes;protein metabolism	translation [GO:0006412];translational elongation [GO:0006414]	protein metabolism			NA	nucleic acid binding activity;other molecular function	GTP binding [GO:0005525];GTPase activity [GO:0003924];translation elongation factor activity [GO:0003746]	GTP binding [GO:0005525]	GTP binding [GO:0005525];GTPase activity [GO:0003924];translation [GO:0006412];translation elongation factor activity [GO:0003746];translational elongation [GO:0006414]	62	22	447	49.2	9.07
1.32459	0.04736	0.656617	C6T0U3	Ribosomal_S10 domain-containing protein	other metabolic processes;protein metabolism	translation [GO:0006412]	protein metabolism	cytosol;translational apparatus	cytosolic small ribosomal subunit [GO:0022627]	cytosol	nucleic acid binding activity;other molecular function	RNA binding [GO:0003723];structural constituent of ribosome [GO:0003735]	RNA binding [GO:0003723]	cytosolic small ribosomal subunit [GO:0022627];RNA binding [GO:0003723];structural constituent of ribosome [GO:0003735];translation [GO:0006412]	59	7	123	13.8	9.58
1.37693	0.0419826	0.656035	I1M8X5	Uncharacterized protein	other metabolic processes		other metabolic processes	other membranes	integral component of membrane [GO:0016021]	integral component of membrane [GO:0016021]	other molecular function		other molecular function	integral component of membrane [GO:0016021]	35	5	258	28.5	9.26
1.50994	0.0309069	0.65271	I1N1D5	Eukaryotic translation initiation factor 3 subunit G	cell organization and biogenesis;other metabolic processes;protein metabolism	formation of cytoplasmic translation initiation complex [GO:0001732]	cell organization and biogenesis	other cell component;translational apparatus	eukaryotic 43S preinitiation complex [GO:0016282];eukaryotic 48S preinitiation complex [GO:0033290];eukaryotic translation initiation factor 3 complex [GO:0005852]	translational apparatus	nucleic acid binding activity	translation initiation factor activity [GO:0003743]	nucleic acid binding activity	eukaryotic 43S preinitiation complex [GO:0016282];eukaryotic 48S preinitiation complex [GO:0033290];eukaryotic translation initiation factor 3 complex [GO:0005852];formation of cytoplasmic translation initiation complex [GO:0001732];translation initiation factor activity [GO:0003743]	35	7	290	32.2	8.21
1.31863	0.0480137	0.651994	C6SY25	Ribosomal_S10 domain-containing protein	other metabolic processes;protein metabolism	translation [GO:0006412]	protein metabolism	cytosol;translational apparatus	cytosolic small ribosomal subunit [GO:0022627]	cytosol	nucleic acid binding activity;other molecular function	RNA binding [GO:0003723];structural constituent of ribosome [GO:0003735]	RNA binding [GO:0003723]	cytosolic small ribosomal subunit [GO:0022627];RNA binding [GO:0003723];structural constituent of ribosome [GO:0003735];translation [GO:0006412]	59	7	123	13.8	9.58
1.92626	0.0118507	0.650334	I1JKB3	Uncharacterized protein			NA			NA			NA		41	6	200	22	6.83
1.75572	0.0175503	0.649072	A0A0R0EVX5	Nicastrin	other metabolic processes;protein metabolism	protein processing [GO:0016485]	protein metabolism	other membranes;plasma membrane	integral component of membrane [GO:0016021]	plasma membrane			NA	integral component of membrane [GO:0016021];protein processing [GO:0016485]	22	7	663	72.2	5.49
1.41863	0.038139	0.644928	I1JWV7	Uncharacterized protein	cell organization and biogenesis	nucleosome assembly [GO:0006334]	cell organization and biogenesis	nucleus;other cell component	nucleus [GO:0005634]	nucleus	other molecular function		other molecular function	nucleosome assembly [GO:0006334];nucleus [GO:0005634]	56	10	262	30.2	4.31
3.03756	0.000917141	0.644806	K7MQG6	ER membrane protein complex subunit 3		protein folding in endoplasmic reticulum [GO:0034975]	protein folding in endoplasmic reticulum [GO:0034975]	ER/Golgi;other membranes	ER membrane protein complex [GO:0072546]	ER/Golgi			NA	ER membrane protein complex [GO:0072546];protein folding in endoplasmic reticulum [GO:0034975]	29	4	246	27.8	8.97
2.10943	0.00777268	0.644418	I1L0U6	Importin subunit alpha	transport	NLS-bearing protein import into nucleus [GO:0006607]	transport	nucleus;other cell component	cytosol [GO:0005829];nuclear pore [GO:0005643];nucleoplasm [GO:0005654]	nucleus	other molecular function	nuclear import signal receptor activity [GO:0061608];nuclear localization sequence binding [GO:0008139]	nuclear import signal receptor activity [GO:0061608]	cytosol [GO:0005829];NLS-bearing protein import into nucleus [GO:0006607];nuclear import signal receptor activity [GO:0061608];nuclear localization sequence binding [GO:0008139];nuclear pore [GO:0005643];nucleoplasm [GO:0005654]	66	22	531	58.6	5.26
2.52133	0.00301075	0.642704	K7LIQ6	HP domain-containing protein	cell organization and biogenesis;other biological processes	actin filament bundle assembly [GO:0051017]	cell organization and biogenesis			NA	cytoskeletal activity	actin filament binding [GO:0051015]	cytoskeletal activity	actin filament binding [GO:0051015];actin filament bundle assembly [GO:0051017]	30	21	973	107.3	5.82
2.19724	0.00634974	0.642618	I1NJ06	ACB domain-containing protein	transport	lipid transport [GO:0006869]	transport	cytosol	cytosol [GO:0005829]	cytosol	other molecular function	fatty-acyl-CoA binding [GO:0000062]	fatty-acyl-CoA binding [GO:0000062]	cytosol [GO:0005829];fatty-acyl-CoA binding [GO:0000062];lipid transport [GO:0006869]	23	11	659	72	5.64
2.85113	0.00140887	0.639563	I1LWR5	UDP-glucose 6-dehydrogenase	other metabolic processes	glycosaminoglycan biosynthetic process [GO:0006024]	glycosaminoglycan biosynthetic process [GO:0006024]	cytosol;nucleus	cytosol [GO:0005829];nucleus [GO:0005634]	cytosol	other molecular function	NAD binding [GO:0051287];UDP-glucose 6-dehydrogenase activity [GO:0003979]	NAD binding [GO:0051287]	cytosol [GO:0005829];glycosaminoglycan biosynthetic process [GO:0006024];NAD binding [GO:0051287];nucleus [GO:0005634];UDP-glucose 6-dehydrogenase activity [GO:0003979]	49	18	480	53	6.46
1.75404	0.0176183	0.639487	C6TD04	Rhodanese domain-containing protein (Fragment)	other metabolic processes;RNA metabolism OR transcription	tRNA wobble position uridine thiolation [GO:0002143]	RNA metabolism OR transcription	cytosol	cytosol [GO:0005829]	cytosol	other molecular function	ATP binding [GO:0005524];metal ion binding [GO:0046872];thiosulfate sulfurtransferase activity [GO:0004792];ubiquitin-like modifier activating enzyme activity [GO:0008641]	ATP binding [GO:0005524]	ATP binding [GO:0005524];cytosol [GO:0005829];metal ion binding [GO:0046872];thiosulfate sulfurtransferase activity [GO:0004792];tRNA wobble position uridine thiolation [GO:0002143];ubiquitin-like modifier activating enzyme activity [GO:0008641]	9	2	456	49.6	7.64
1.70985	0.019505	0.639145	I1KV92	Coatomer subunit beta'	transport	endoplasmic reticulum to Golgi vesicle-mediated transport [GO:0006888];intracellular protein transport [GO:0006886];intra-Golgi vesicle-mediated transport [GO:0006891];retrograde vesicle-mediated transport, Golgi to endoplasmic reticulum [GO:0006890]	transport	ER/Golgi;other membranes	COPI vesicle coat [GO:0030126];Golgi membrane [GO:0000139]	ER/Golgi	other molecular function	structural molecule activity [GO:0005198]	structural molecule activity [GO:0005198]	COPI vesicle coat [GO:0030126];endoplasmic reticulum to Golgi vesicle-mediated transport [GO:0006888];Golgi membrane [GO:0000139];intracellular protein transport [GO:0006886];intra-Golgi vesicle-mediated transport [GO:0006891];retrograde vesicle-mediated transport, Golgi to endoplasmic reticulum [GO:0006890];structural molecule activity [GO:0005198]	32	20	905	102.1	5.11
3.37664	0.000420112	0.638256	I1KQC2	Uncharacterized protein	cell organization and biogenesis	mitochondrial fission [GO:0000266]	cell organization and biogenesis	other cell component;other membranes	cytoplasm [GO:0005737];membrane [GO:0016020]	cytoplasm [GO:0005737]	cytoskeletal activity;other molecular function	GTP binding [GO:0005525];GTPase activity [GO:0003924];microtubule binding [GO:0008017]	GTP binding [GO:0005525]	cytoplasm [GO:0005737];GTP binding [GO:0005525];GTPase activity [GO:0003924];membrane [GO:0016020];microtubule binding [GO:0008017];mitochondrial fission [GO:0000266]	39	17	617	69.3	7.87
2.53356	0.00292709	0.638129	A0A0R0JAW2	DUF4005 domain-containing protein			NA			NA	other molecular function		other molecular function		9	4	849	93.3	5.99
2.16647	0.00681607	0.634067	I1M595	Uncharacterized protein	cell organization and biogenesis;transport	protein import into mitochondrial matrix [GO:0030150]	cell organization and biogenesis	mitochondrion;other membranes	integral component of mitochondrial inner membrane [GO:0031305];TIM23 mitochondrial import inner membrane translocase complex [GO:0005744]	mitochondrion	transporter activity	protein transmembrane transporter activity [GO:0008320]	transporter activity	integral component of mitochondrial inner membrane [GO:0031305];protein import into mitochondrial matrix [GO:0030150];protein transmembrane transporter activity [GO:0008320];TIM23 mitochondrial import inner membrane translocase complex [GO:0005744]	24	3	188	19.8	9.5
2.20309	0.00626489	0.633091	I1M658	Transmembrane 9 superfamily member	other biological processes	protein localization to membrane [GO:0072657]	protein localization to membrane [GO:0072657]	ER/Golgi;other cytoplasmic organelle;other membranes	endosome [GO:0005768];Golgi apparatus [GO:0005794];integral component of membrane [GO:0016021];membrane [GO:0016020];trans-Golgi network [GO:0005802]	ER/Golgi			NA	endosome [GO:0005768];Golgi apparatus [GO:0005794];integral component of membrane [GO:0016021];membrane [GO:0016020];protein localization to membrane [GO:0072657];trans-Golgi network [GO:0005802]	11	5	661	75.1	6.96
2.26391	0.00544621	0.632323	I1MLV5	Fe2OG dioxygenase domain-containing protein			NA			NA	other molecular function	dioxygenase activity [GO:0051213]	dioxygenase activity [GO:0051213]	dioxygenase activity [GO:0051213]	39	8	312	35.8	5.69
1.7199	0.0190591	0.630975	I1M042	Uncharacterized protein	other biological processes		other biological processes	nucleus	nucleus [GO:0005634]	nucleus	nucleic acid binding activity	mRNA binding [GO:0003729]	mRNA binding [GO:0003729]	mRNA binding [GO:0003729];nucleus [GO:0005634]	15	7	551	61.4	8.62
2.08182	0.00828276	0.629764	I1JCR1	Uncharacterized protein			NA		nucleus [GO:0005634]	nucleus [GO:0005634]	other molecular function	histone binding [GO:0042393]	histone binding [GO:0042393]	histone binding [GO:0042393];nucleus [GO:0005634]	18	4	464	51.8	3.98
2.04734	0.00896728	0.628599	C6TFJ7	Cytochrome b5 heme-binding domain-containing protein	other metabolic processes		other metabolic processes	other cell component;other membranes	integral component of membrane [GO:0016021]	integral component of membrane [GO:0016021]	other molecular function	heme binding [GO:0020037];metal ion binding [GO:0046872]	heme binding [GO:0020037]	heme binding [GO:0020037];integral component of membrane [GO:0016021];metal ion binding [GO:0046872]	23	2	141	15.3	6.06
2.11252	0.00771764	0.628235	I1KQS1	Uncharacterized protein			NA			NA			NA		25	7	381	43.4	8.53
2.11562	0.00766259	0.626498	I1KEX4	Uncharacterized protein			NA	other cell component		other cell component			NA		20	2	133	15.5	8.27
1.30918	0.0490704	0.623531	C6TGQ1	Squalene synthase	other metabolic processes	ergosterol biosynthetic process [GO:0006696]	ergosterol biosynthetic process [GO:0006696]	other membranes	integral component of membrane [GO:0016021]	integral component of membrane [GO:0016021]	other molecular function	farnesyl-diphosphate farnesyltransferase activity [GO:0004310];squalene synthase activity [GO:0051996]	NA	ergosterol biosynthetic process [GO:0006696];farnesyl-diphosphate farnesyltransferase activity [GO:0004310];integral component of membrane [GO:0016021];squalene synthase activity [GO:0051996]	26	8	413	47.1	6.71
4.97831	1.05122e-05	0.616593	I1KWA0	Uncharacterized protein	cell cycle OR cell proliferation;other biological processes		cell cycle OR cell proliferation			NA	other molecular function		other molecular function		39	16	576	65.2	4.83
2.4504	0.00354488	0.612877	I1M987	Phytocyanin domain-containing protein	other metabolic processes		other metabolic processes	other membranes;plasma membrane	anchored component of plasma membrane [GO:0046658];integral component of membrane [GO:0016021]	plasma membrane	other molecular function	electron transfer activity [GO:0009055]	electron transfer activity [GO:0009055]	anchored component of plasma membrane [GO:0046658];electron transfer activity [GO:0009055];integral component of membrane [GO:0016021]	13	2	190	20.3	7.96
1.35189	0.0444739	0.607816	I1K0Z2	Lon protease homolog 2, peroxisomal	cell organization and biogenesis;other metabolic processes;protein metabolism;transport	protein import into peroxisome matrix [GO:0016558];protein processing [GO:0016485];protein quality control for misfolded or incompletely synthesized proteins [GO:0006515];protein targeting to peroxisome [GO:0006625]	cell organization and biogenesis	other cytoplasmic organelle	peroxisomal matrix [GO:0005782]	peroxisomal matrix [GO:0005782]	other molecular function	ATP binding [GO:0005524];ATP-dependent peptidase activity [GO:0004176];serine-type endopeptidase activity [GO:0004252]	ATP binding [GO:0005524]	ATP binding [GO:0005524];ATP-dependent peptidase activity [GO:0004176];peroxisomal matrix [GO:0005782];protein import into peroxisome matrix [GO:0016558];protein processing [GO:0016485];protein quality control for misfolded or incompletely synthesized proteins [GO:0006515];protein targeting to peroxisome [GO:0006625];serine-type endopeptidase activity [GO:0004252]	5	2	885	98.2	8.37
2.92345	0.00119275	0.605471	I1KMC5	Uncharacterized protein	other biological processes		other biological processes	nucleus	nucleus [GO:0005634]	nucleus	nucleic acid binding activity;other molecular function	DNA-binding transcription repressor activity, RNA polymerase II-specific [GO:0001227];double-stranded DNA binding [GO:0003690];purine-rich negative regulatory element binding [GO:0032422];RNA polymerase II regulatory region sequence-specific DNA binding [GO:0000977];sequence-specific DNA binding [GO:0043565]	nucleic acid binding activity	DNA-binding transcription repressor activity, RNA polymerase II-specific [GO:0001227];double-stranded DNA binding [GO:0003690];nucleus [GO:0005634];purine-rich negative regulatory element binding [GO:0032422];RNA polymerase II regulatory region sequence-specific DNA binding [GO:0000977];sequence-specific DNA binding [GO:0043565]	25	5	283	31.5	5.94
2.12715	0.00746188	0.60496	I1MCM4	RanBD1 domain-containing protein	other biological processes;transport	intracellular transport [GO:0046907];positive regulation of GTPase activity [GO:0043547]	transport	cytosol;nucleus;other cell component	cytoplasm [GO:0005737];cytosol [GO:0005829];nuclear pore [GO:0005643];nucleus [GO:0005634]	cytosol		Ran GTPase binding [GO:0008536]	Ran GTPase binding [GO:0008536]	cytoplasm [GO:0005737];cytosol [GO:0005829];intracellular transport [GO:0046907];nuclear pore [GO:0005643];nucleus [GO:0005634];positive regulation of GTPase activity [GO:0043547];Ran GTPase binding [GO:0008536]	16	6	451	48.1	4.91
1.52805	0.0296451	0.600321	I1K0L4	Beta-fructofuranosidase	other metabolic processes	carbohydrate metabolic process [GO:0005975]	carbohydrate metabolic process [GO:0005975]	other cytoplasmic organelle;other membranes	integral component of membrane [GO:0016021]	integral component of membrane [GO:0016021]	other molecular function	sucrose alpha-glucosidase activity [GO:0004575]	sucrose alpha-glucosidase activity [GO:0004575]	carbohydrate metabolic process [GO:0005975];integral component of membrane [GO:0016021];sucrose alpha-glucosidase activity [GO:0004575]	37	20	645	71.7	6
3.66796	0.000214803	0.598342	C6TE08	Epimerase domain-containing protein			NA			NA	other molecular function	coenzyme binding [GO:0050662];oxidoreductase activity [GO:0016491];oxidoreductase activity, acting on the CH-OH group of donors, NAD or NADP as acceptor [GO:0016616]	oxidoreductase activity [GO:0016491]	coenzyme binding [GO:0050662];oxidoreductase activity [GO:0016491];oxidoreductase activity, acting on the CH-OH group of donors, NAD or NADP as acceptor [GO:0016616]	30	7	336	36.8	6.52
1.42344	0.0377186	0.598043	I1MLX4	60S ribosomal protein L13	other metabolic processes;protein metabolism	translation [GO:0006412]	protein metabolism	cytosol;translational apparatus	cytosolic large ribosomal subunit [GO:0022625]	cytosol	nucleic acid binding activity;other molecular function	structural constituent of ribosome [GO:0003735]	structural constituent of ribosome [GO:0003735]	cytosolic large ribosomal subunit [GO:0022625];structural constituent of ribosome [GO:0003735];translation [GO:0006412]	32	7	207	23.9	10.93
1.30814	0.0491885	0.598039	I1L4H0	Aldedh domain-containing protein			NA			NA	other molecular function	aldehyde dehydrogenase (NAD) activity [GO:0004029]	aldehyde dehydrogenase (NAD) activity [GO:0004029]	aldehyde dehydrogenase (NAD) activity [GO:0004029]	32	13	501	54.5	6.95
3.59458	0.000254343	0.59706	I1JRY0	Tubulin gamma chain	cell cycle OR cell proliferation;cell organization and biogenesis	cytoplasmic microtubule organization [GO:0031122];meiotic spindle organization [GO:0000212];microtubule cytoskeleton organization [GO:0000226];microtubule nucleation [GO:0007020];microtubule-based process [GO:0007017];mitotic cell cycle [GO:0000278];mitotic sister chromatid segregation [GO:0000070];mitotic spindle organization [GO:0007052]	cell organization and biogenesis	cytoskeleton;nucleus;other cell component	centrosome [GO:0005813];cytoplasm [GO:0005737];gamma-tubulin complex [GO:0000930];microtubule [GO:0005874];nucleus [GO:0005634];spindle [GO:0005819]	cytoskeleton	cytoskeletal activity;other molecular function	GTP binding [GO:0005525];GTPase activity [GO:0003924];structural constituent of cytoskeleton [GO:0005200]	GTP binding [GO:0005525]	centrosome [GO:0005813];cytoplasm [GO:0005737];cytoplasmic microtubule organization [GO:0031122];gamma-tubulin complex [GO:0000930];GTP binding [GO:0005525];GTPase activity [GO:0003924];meiotic spindle organization [GO:0000212];microtubule [GO:0005874];microtubule cytoskeleton organization [GO:0000226];microtubule nucleation [GO:0007020];microtubule-based process [GO:0007017];mitotic cell cycle […	17	4	474	53.2	5.82
3.062	0.000866963	0.596826	I1MKL8	Uncharacterized protein	transport		transport	other membranes	integral component of membrane [GO:0016021]	integral component of membrane [GO:0016021]		transmembrane transporter activity [GO:0022857]	transmembrane transporter activity [GO:0022857]	integral component of membrane [GO:0016021];transmembrane transporter activity [GO:0022857]	20	5	355	38.3	9.28
1.63124	0.0233755	0.595745	I1KSZ0	SAM_MT_RSMB_NOP domain-containing protein	other metabolic processes;RNA metabolism OR transcription		RNA metabolism OR transcription	nucleus		nucleus	nucleic acid binding activity;other molecular function	methyltransferase activity [GO:0008168];RNA binding [GO:0003723];tRNA (cytosine-5-)-methyltransferase activity [GO:0016428]	RNA binding [GO:0003723]	methyltransferase activity [GO:0008168];RNA binding [GO:0003723];tRNA (cytosine-5-)-methyltransferase activity [GO:0016428]	10	6	820	92.1	6.48
2.08055	0.00830706	0.595731	I1L1Q6	Uncharacterized protein	protein metabolism		protein metabolism			NA	other molecular function	serine-type endopeptidase activity [GO:0004252]	serine-type endopeptidase activity [GO:0004252]	serine-type endopeptidase activity [GO:0004252]	32	14	770	82	7.83
3.57027	0.000268989	0.594359	I1L7V1	UDP-glucuronate decarboxylase	other metabolic processes	D-xylose metabolic process [GO:0042732]	D-xylose metabolic process [GO:0042732]	other cell component;other membranes	cytoplasm [GO:0005737];integral component of membrane [GO:0016021];trans-Golgi network [GO:0005802]	cytoplasm [GO:0005737]	other molecular function	NAD+ binding [GO:0070403];UDP-glucuronate decarboxylase activity [GO:0048040]	NAD+ binding [GO:0070403]	cytoplasm [GO:0005737];D-xylose metabolic process [GO:0042732];integral component of membrane [GO:0016021];NAD+ binding [GO:0070403];trans-Golgi network [GO:0005802];UDP-glucuronate decarboxylase activity [GO:0048040]	44	13	427	48	8.92
2.99033	0.00102251	0.592753	C6SYP7	Dirigent protein			NA	non-structural extracellular	apoplast [GO:0048046]	non-structural extracellular			NA	apoplast [GO:0048046]	18	2	217	24.2	8.37
1.32307	0.047526	0.590532	Q84P43	Protein kinase Pti1	other metabolic processes;protein metabolism		protein metabolism			NA	kinase activity;other molecular function	ATP binding [GO:0005524];protein tyrosine kinase activity [GO:0004713]	ATP binding [GO:0005524]	ATP binding [GO:0005524];protein tyrosine kinase activity [GO:0004713]	34	8	366	40.4	7.99
4.02639	9.41044e-05	0.590189	I1JED0	UDP-glucose 6-dehydrogenase	other metabolic processes	glycosaminoglycan biosynthetic process [GO:0006024]	glycosaminoglycan biosynthetic process [GO:0006024]	cytosol;nucleus	cytosol [GO:0005829];nucleus [GO:0005634]	cytosol	other molecular function	NAD binding [GO:0051287];UDP-glucose 6-dehydrogenase activity [GO:0003979]	NAD binding [GO:0051287]	cytosol [GO:0005829];glycosaminoglycan biosynthetic process [GO:0006024];NAD binding [GO:0051287];nucleus [GO:0005634];UDP-glucose 6-dehydrogenase activity [GO:0003979]	44	13	480	52.8	6.62
3.56287	0.00027361	0.590172	I1M5R5	Glutaredoxin domain-containing protein		cell redox homeostasis [GO:0045454]	cell redox homeostasis [GO:0045454]		cell [GO:0005623]	cell [GO:0005623]	other molecular function	2 iron, 2 sulfur cluster binding [GO:0051537];electron transfer activity [GO:0009055];metal ion binding [GO:0046872];protein disulfide oxidoreductase activity [GO:0015035]	metal ion binding [GO:0046872]	2 iron, 2 sulfur cluster binding [GO:0051537];cell [GO:0005623];cell redox homeostasis [GO:0045454];electron transfer activity [GO:0009055];metal ion binding [GO:0046872];protein disulfide oxidoreductase activity [GO:0015035]	27	3	157	17.7	5.54
3.49592	0.000319215	0.589426	A0A0R0JVZ4	Uncharacterized protein			NA	nucleus	nucleus [GO:0005634];P granule [GO:0043186]	nucleus	nucleic acid binding activity;other molecular function	ATP binding [GO:0005524];RNA binding [GO:0003723];RNA helicase activity [GO:0003724]	ATP binding [GO:0005524]	ATP binding [GO:0005524];nucleus [GO:0005634];P granule [GO:0043186];RNA binding [GO:0003723];RNA helicase activity [GO:0003724]	31	13	614	66.2	8.13
2.9974	0.001006	0.589132	I1LK90	NOT2_3_5 domain-containing protein	other biological processes	regulation of transcription, DNA-templated [GO:0006355]	regulation of transcription, DNA-templated [GO:0006355]	other cell component	CCR4-NOT core complex [GO:0030015];nucleus [GO:0005634]	nucleus [GO:0005634]			NA	CCR4-NOT core complex [GO:0030015];nucleus [GO:0005634];regulation of transcription, DNA-templated [GO:0006355]	10	3	647	68.7	7.61
1.91349	0.0122043	0.58656	Q9XFI8	Peroxidase (Fragment)	other biological processes;other metabolic processes;stress response	hydrogen peroxide catabolic process [GO:0042744];response to oxidative stress [GO:0006979]	stress response	non-structural extracellular	extracellular region [GO:0005576]	non-structural extracellular	other molecular function	heme binding [GO:0020037];metal ion binding [GO:0046872];peroxidase activity [GO:0004601]	heme binding [GO:0020037]	extracellular region [GO:0005576];heme binding [GO:0020037];hydrogen peroxide catabolic process [GO:0042744];metal ion binding [GO:0046872];peroxidase activity [GO:0004601];response to oxidative stress [GO:0006979]	25	6	344	37.6	7.36
1.75389	0.0176241	0.58551	A0A0R0I5R9	Methionine gamma lyase 1	other metabolic processes	cysteine biosynthetic process via cystathionine [GO:0019343];transsulfuration [GO:0019346]	amino acid metabolic process [GO:0006520]	other cell component	cytoplasm [GO:0005737]	cytoplasm [GO:0005737]	other molecular function	carbon-sulfur lyase activity [GO:0016846];cystathionine gamma-lyase activity [GO:0004123];pyridoxal phosphate binding [GO:0030170]	NA	carbon-sulfur lyase activity [GO:0016846];cystathionine gamma-lyase activity [GO:0004123];cysteine biosynthetic process via cystathionine [GO:0019343];cytoplasm [GO:0005737];pyridoxal phosphate binding [GO:0030170];transsulfuration [GO:0019346]	27	10	442	48	6.52
2.46231	0.00344897	0.585233	C6TJ59	RRM domain-containing protein		germ cell development [GO:0007281]	germ cell development [GO:0007281]			NA	nucleic acid binding activity	mRNA binding [GO:0003729]	mRNA binding [GO:0003729]	germ cell development [GO:0007281];mRNA binding [GO:0003729]	4	2	287	31.4	8.72
2.65079	0.00223465	0.585193	C6T5F7	Aminoacyl-tRNA hydrolase			NA			NA	other molecular function	aminoacyl-tRNA hydrolase activity [GO:0004045]	aminoacyl-tRNA hydrolase activity [GO:0004045]	aminoacyl-tRNA hydrolase activity [GO:0004045]	26	4	190	21.2	9.44
3.00728	0.000983386	-0.586492	I1LDY8	Sulfate adenylyltransferase	other metabolic processes	sulfate assimilation [GO:0000103]	sulfate assimilation [GO:0000103]			NA	kinase activity;other molecular function	adenylylsulfate kinase activity [GO:0004020];sulfate adenylyltransferase (ATP) activity [GO:0004781]	kinase activity	adenylylsulfate kinase activity [GO:0004020];sulfate adenylyltransferase (ATP) activity [GO:0004781];sulfate assimilation [GO:0000103]	36	11	465	52.1	7.8
1.44428	0.0359515	-0.587715	C6T0R5	Ribosomal_L18e/L15P domain-containing protein	other metabolic processes;protein metabolism	translation [GO:0006412]	protein metabolism	cytosol;translational apparatus	cytosolic large ribosomal subunit [GO:0022625]	cytosol	nucleic acid binding activity;other molecular function	structural constituent of ribosome [GO:0003735]	structural constituent of ribosome [GO:0003735]	cytosolic large ribosomal subunit [GO:0022625];structural constituent of ribosome [GO:0003735];translation [GO:0006412]	36	7	187	21	11.18
1.94644	0.0113124	-0.58901	A0A0R0HLZ4	DHQ_synthase domain-containing protein	other metabolic processes	aromatic amino acid family biosynthetic process [GO:0009073];chorismate biosynthetic process [GO:0009423]	NA	other cell component	cytoplasm [GO:0005737]	cytoplasm [GO:0005737]	other molecular function	3-dehydroquinate synthase activity [GO:0003856]	3-dehydroquinate synthase activity [GO:0003856]	3-dehydroquinate synthase activity [GO:0003856];aromatic amino acid family biosynthetic process [GO:0009073];chorismate biosynthetic process [GO:0009423];cytoplasm [GO:0005737]	29	8	437	47.7	7.2
3.31645	0.00048256	-0.589494	C6TC18	Fe2OG dioxygenase domain-containing protein			NA			NA	other molecular function	dioxygenase activity [GO:0051213];metal ion binding [GO:0046872]	metal ion binding [GO:0046872]	dioxygenase activity [GO:0051213];metal ion binding [GO:0046872]	12	5	356	40.2	5.3
2.56289	0.00273594	-0.589742	C6ZRT3	Protein kinase-related protein	other metabolic processes;protein metabolism;signal transduction		protein metabolism	other membranes;plasma membrane	integral component of membrane [GO:0016021];plasma membrane [GO:0005886]	plasma membrane	kinase activity;other molecular function	ATP binding [GO:0005524];polysaccharide binding [GO:0030247];protein serine/threonine kinase activity [GO:0004674]	ATP binding [GO:0005524]	ATP binding [GO:0005524];integral component of membrane [GO:0016021];plasma membrane [GO:0005886];polysaccharide binding [GO:0030247];protein serine/threonine kinase activity [GO:0004674]	10	4	649	70.4	7.55
4.31597	4.83087e-05	-0.590401	I1KEA0	Aldo_ket_red domain-containing protein			NA			NA	other molecular function		other molecular function		33	11	343	37.8	6.55
3.19503	0.000638219	-0.594438	C6TLX4	PKS_ER domain-containing protein			NA			NA	other molecular function	oxidoreductase activity [GO:0016491];zinc ion binding [GO:0008270]	zinc ion binding [GO:0008270]	oxidoreductase activity [GO:0016491];zinc ion binding [GO:0008270]	64	15	322	35.1	5.82
2.86421	0.00136708	-0.594776	C6TJ74	Uncharacterized protein			NA			NA			NA		9	3	406	45.1	6.62
3.31467	0.000484543	-0.595618	C6TNS8	Dihydroflavonol 4-reductase	other metabolic processes	anthocyanin-containing compound biosynthetic process [GO:0009718]	anthocyanin-containing compound biosynthetic process [GO:0009718]			NA	other molecular function	coenzyme binding [GO:0050662];dihydrokaempferol 4-reductase activity [GO:0045552];oxidoreductase activity [GO:0016491];oxidoreductase activity, acting on the CH-OH group of donors, NAD or NADP as acceptor [GO:0016616]	oxidoreductase activity [GO:0016491]	anthocyanin-containing compound biosynthetic process [GO:0009718];coenzyme binding [GO:0050662];dihydrokaempferol 4-reductase activity [GO:0045552];oxidoreductase activity [GO:0016491];oxidoreductase activity, acting on the CH-OH group of donors, NAD or NADP as acceptor [GO:0016616]	31	8	339	37.9	6.46
2.00715	0.00983664	-0.595799	A0A0R0L5Y8	EF-hand domain-containing protein			NA	other membranes	integral component of membrane [GO:0016021]	integral component of membrane [GO:0016021]	other molecular function	calcium ion binding [GO:0005509]	calcium ion binding [GO:0005509]	calcium ion binding [GO:0005509];integral component of membrane [GO:0016021]	11	2	259	28.9	8.95
3.32952	0.000468255	-0.598895	I1MQ52	Abhydrolase_3 domain-containing protein			NA			NA	other molecular function	hydrolase activity [GO:0016787]	hydrolase activity [GO:0016787]	hydrolase activity [GO:0016787]	33	7	318	35.2	5.68
2.53406	0.00292376	-0.599596	K7KU93	Aamy domain-containing protein	other metabolic processes	carbohydrate metabolic process [GO:0005975]	carbohydrate metabolic process [GO:0005975]			NA	other molecular function	hydrolase activity, hydrolyzing O-glycosyl compounds [GO:0004553]	hydrolase activity, hydrolyzing O-glycosyl compounds [GO:0004553]	carbohydrate metabolic process [GO:0005975];hydrolase activity, hydrolyzing O-glycosyl compounds [GO:0004553]	16	8	772	87	6.13
2.34544	0.00451399	-0.602389	I1JR24	ATP citrate synthase			NA			NA	other molecular function	ATP binding [GO:0005524]	ATP binding [GO:0005524]	ATP binding [GO:0005524]	23	6	423	46.7	5.47
1.43456	0.0367655	-0.602684	A0A0R0IB61	Methylthioribose-1-phosphate isomerase	other metabolic processes	L-methionine salvage from methylthioadenosine [GO:0019509];L-methionine salvage from S-adenosylmethionine [GO:0019284]	NA	nucleus;other cell component	cytoplasm [GO:0005737];nucleus [GO:0005634]	nucleus	other molecular function	S-methyl-5-thioribose-1-phosphate isomerase activity [GO:0046523]	S-methyl-5-thioribose-1-phosphate isomerase activity [GO:0046523]	cytoplasm [GO:0005737];L-methionine salvage from methylthioadenosine [GO:0019509];L-methionine salvage from S-adenosylmethionine [GO:0019284];nucleus [GO:0005634];S-methyl-5-thioribose-1-phosphate isomerase activity [GO:0046523]	31	6	374	40	6.8
1.83631	0.0145776	-0.603024	I1MQX4	Uncharacterized protein			NA			NA	other molecular function	transferase activity, transferring acyl groups other than amino-acyl groups [GO:0016747]	transferase activity, transferring acyl groups other than amino-acyl groups [GO:0016747]	transferase activity, transferring acyl groups other than amino-acyl groups [GO:0016747]	26	6	400	41.4	8.09
3.99473	0.000101221	-0.605949	I1LN34	Uncharacterized protein			NA			NA	other molecular function	selenium binding [GO:0008430]	selenium binding [GO:0008430]	selenium binding [GO:0008430]	45	17	480	53.1	6.18
2.19151	0.00643415	-0.607526	I1KV61	Uncharacterized protein	other metabolic processes		other metabolic processes			NA	other molecular function	catalytic activity [GO:0003824]	catalytic activity [GO:0003824]	catalytic activity [GO:0003824]	11	3	601	65.7	6.99
1.96997	0.0107159	-0.607938	I1JHQ1	Uncharacterized protein	other metabolic processes	fatty acid alpha-oxidation [GO:0001561]	fatty acid alpha-oxidation [GO:0001561]	other cytoplasmic organelle	peroxisome [GO:0005777]	peroxisome [GO:0005777]	other molecular function	carbon-carbon lyase activity [GO:0016830];magnesium ion binding [GO:0000287];thiamine pyrophosphate binding [GO:0030976]	magnesium ion binding [GO:0000287]	carbon-carbon lyase activity [GO:0016830];fatty acid alpha-oxidation [GO:0001561];magnesium ion binding [GO:0000287];peroxisome [GO:0005777];thiamine pyrophosphate binding [GO:0030976]	43	16	566	60.6	6.44
1.32121	0.0477301	-0.609802	C6TJ98	Uncharacterized protein			NA			NA	other molecular function	hydrolase activity [GO:0016787]	hydrolase activity [GO:0016787]	hydrolase activity [GO:0016787]	25	4	251	27.6	4.88
2.58519	0.002599	-0.610461	A0A0R4J4L3	Annexin		response to cold [GO:0009409];response to heat [GO:0009408];response to salt stress [GO:0009651];response to water deprivation [GO:0009414]	stress response	other cell component		other cell component	other molecular function	calcium ion binding [GO:0005509];calcium-dependent phospholipid binding [GO:0005544]	calcium ion binding [GO:0005509]	calcium ion binding [GO:0005509];calcium-dependent phospholipid binding [GO:0005544];response to cold [GO:0009409];response to heat [GO:0009408];response to salt stress [GO:0009651];response to water deprivation [GO:0009414]	30	10	312	35.9	7.91
3.31693	0.000482029	-0.614119	Q9FQD4	Glutathione transferase	other biological processes;other metabolic processes	glutathione metabolic process [GO:0006749]	glutathione metabolic process [GO:0006749]	cytosol;other cell component	cytoplasm [GO:0005737]	cytosol	other molecular function	glutathione binding [GO:0043295];glutathione transferase activity [GO:0004364]	glutathione binding [GO:0043295]	cytoplasm [GO:0005737];glutathione binding [GO:0043295];glutathione metabolic process [GO:0006749];glutathione transferase activity [GO:0004364]	41	6	215	24.8	6.07
2.33397	0.00463477	-0.616601	I1N2X1	Uncharacterized protein	other metabolic processes	formaldehyde catabolic process [GO:0046294]	formaldehyde catabolic process [GO:0046294]	cytosol	cytosol [GO:0005829]	cytosol	other molecular function	alcohol dehydrogenase activity, zinc-dependent [GO:0004024];S-(hydroxymethyl)glutathione dehydrogenase activity [GO:0051903];zinc ion binding [GO:0008270]	zinc ion binding [GO:0008270]	alcohol dehydrogenase activity, zinc-dependent [GO:0004024];cytosol [GO:0005829];formaldehyde catabolic process [GO:0046294];S-(hydroxymethyl)glutathione dehydrogenase activity [GO:0051903];zinc ion binding [GO:0008270]	12	3	397	42.7	6.79
1.82675	0.014902	-0.616823	I1L6Y9	Alpha-galactosidase	other metabolic processes	carbohydrate metabolic process [GO:0005975]	carbohydrate metabolic process [GO:0005975]	other cell component	plant-type cell wall [GO:0009505]	plant-type cell wall [GO:0009505]	other molecular function	raffinose alpha-galactosidase activity [GO:0052692]	raffinose alpha-galactosidase activity [GO:0052692]	carbohydrate metabolic process [GO:0005975];plant-type cell wall [GO:0009505];raffinose alpha-galactosidase activity [GO:0052692]	23	7	410	45.6	7.15
1.75481	0.017587	-0.617764	C6TDG2	Protein kinase domain-containing protein	other metabolic processes;protein metabolism		protein metabolism			NA	kinase activity;other molecular function	ATP binding [GO:0005524];protein serine/threonine kinase activity [GO:0004674]	ATP binding [GO:0005524]	ATP binding [GO:0005524];protein serine/threonine kinase activity [GO:0004674]	9	2	336	38	6.35
1.33797	0.0459225	-0.61863	K7M7U0	HECT-type E3 ubiquitin transferase	other metabolic processes;protein metabolism		protein metabolism			NA	other molecular function	ubiquitin-protein transferase activity [GO:0004842]	ubiquitin-protein transferase activity [GO:0004842]	ubiquitin-protein transferase activity [GO:0004842]	10	20	3612	398	5.34
1.66703	0.0215261	-0.619033	A0A0R0JRB0	L-lactate dehydrogenase	other metabolic processes	carbohydrate metabolic process [GO:0005975];carboxylic acid metabolic process [GO:0019752]	carbohydrate metabolic process [GO:0005975]	other cell component	cytoplasm [GO:0005737]	cytoplasm [GO:0005737]	other molecular function	L-lactate dehydrogenase activity [GO:0004459]	L-lactate dehydrogenase activity [GO:0004459]	carbohydrate metabolic process [GO:0005975];carboxylic acid metabolic process [GO:0019752];cytoplasm [GO:0005737];L-lactate dehydrogenase activity [GO:0004459]	38	8	349	37.8	7.02
1.38985	0.0407518	-0.623256	A0A0R0JVM8	Mannan endo-1,4-beta-mannosidase	cell organization and biogenesis;other metabolic processes	actin filament organization [GO:0007015];carbohydrate metabolic process [GO:0005975]	cell organization and biogenesis	non-structural extracellular		non-structural extracellular	cytoskeletal activity;other molecular function	actin filament binding [GO:0051015];hydrolase activity, hydrolyzing O-glycosyl compounds [GO:0004553]	actin filament binding [GO:0051015]	actin filament binding [GO:0051015];actin filament organization [GO:0007015];carbohydrate metabolic process [GO:0005975];hydrolase activity, hydrolyzing O-glycosyl compounds [GO:0004553]	14	4	955	107.5	5.85
1.77358	0.0168429	-0.624626	I1KH77	Midasin	cell organization and biogenesis;other metabolic processes;RNA metabolism OR transcription	ribosomal large subunit assembly [GO:0000027];rRNA processing [GO:0006364]	cell organization and biogenesis	nucleus;other cell component	nucleus [GO:0005634]	nucleus	other molecular function	ATP binding [GO:0005524];ATPase activity [GO:0016887]	ATP binding [GO:0005524]	ATP binding [GO:0005524];ATPase activity [GO:0016887];nucleus [GO:0005634];ribosomal large subunit assembly [GO:0000027];rRNA processing [GO:0006364]	1	3	5435	618.8	5.66
1.54902	0.0282475	-0.624775	A0A0R4J3C5	Uncharacterized protein			NA			NA	other molecular function	pyridoxal phosphate binding [GO:0030170];transaminase activity [GO:0008483]	NA	pyridoxal phosphate binding [GO:0030170];transaminase activity [GO:0008483]	15	6	477	51.4	7.64
1.54327	0.028624	-0.633068	K7N0I2	N-acyl-L-amino-acid amidohydrolase	other metabolic processes	cellular amino acid metabolic process [GO:0006520]	cellular amino acid metabolic process [GO:0006520]	other cell component	cytoplasm [GO:0005737]	cytoplasm [GO:0005737]	other molecular function	aminoacylase activity [GO:0004046];metallopeptidase activity [GO:0008237]	NA	aminoacylase activity [GO:0004046];cellular amino acid metabolic process [GO:0006520];cytoplasm [GO:0005737];metallopeptidase activity [GO:0008237]	39	12	446	49.7	6.9
2.40088	0.00397302	-0.63365	C6T3L8	WD_REPEATS_REGION domain-containing protein (Fragment)			NA			NA			NA		17	2	198	22.2	7.84
1.69403	0.0202287	-0.642617	I1J4B5	Uncharacterized protein			NA	other cytoplasmic organelle;other membranes	integral component of membrane [GO:0016021];vacuole [GO:0005773]	vacuole [GO:0005773]	other molecular function	catalytic activity [GO:0003824]	catalytic activity [GO:0003824]	catalytic activity [GO:0003824];integral component of membrane [GO:0016021];vacuole [GO:0005773]	11	4	462	51	6.68
1.57163	0.0268146	-0.643213	I1LCC3	Electron transfer flavoprotein subunit beta	other metabolic processes		other metabolic processes	mitochondrion		mitochondrion	other molecular function	electron transfer activity [GO:0009055]	electron transfer activity [GO:0009055]	electron transfer activity [GO:0009055]	26	4	253	27.7	7.84
1.37301	0.042363	-0.64379	C6TNF9	Pyr_redox_2 domain-containing protein	other metabolic processes		other metabolic processes	other cell component	cytoplasm [GO:0005737]	cytoplasm [GO:0005737]	other molecular function	electron-transferring-flavoprotein dehydrogenase activity [GO:0004174];flavin adenine dinucleotide binding [GO:0050660]	NA	cytoplasm [GO:0005737];electron-transferring-flavoprotein dehydrogenase activity [GO:0004174];flavin adenine dinucleotide binding [GO:0050660]	33	11	360	39.1	9.38
2.87731	0.00132646	-0.644363	I1JJ62	Citrate synthase	other metabolic processes	carbohydrate metabolic process [GO:0005975];tricarboxylic acid cycle [GO:0006099]	carbohydrate metabolic process [GO:0005975]	mitochondrion	mitochondrial matrix [GO:0005759]	mitochondrion	other molecular function	citrate (Si)-synthase activity [GO:0004108]	citrate (Si)-synthase activity [GO:0004108]	carbohydrate metabolic process [GO:0005975];citrate (Si)-synthase activity [GO:0004108];mitochondrial matrix [GO:0005759];tricarboxylic acid cycle [GO:0006099]	11	3	512	56.5	8.72
1.38587	0.0411276	-0.649936	I1MV76	Glutamate dehydrogenase	other metabolic processes	cellular amino acid metabolic process [GO:0006520]	cellular amino acid metabolic process [GO:0006520]	mitochondrion		mitochondrion	other molecular function	nucleotide binding [GO:0000166];oxidoreductase activity, acting on the CH-NH2 group of donors, NAD or NADP as acceptor [GO:0016639]	nucleotide binding [GO:0000166]	cellular amino acid metabolic process [GO:0006520];nucleotide binding [GO:0000166];oxidoreductase activity, acting on the CH-NH2 group of donors, NAD or NADP as acceptor [GO:0016639]	18	7	412	44.7	6.54
1.37117	0.0425432	-0.655622	I1KPH3	Uncharacterized protein	transport		transport	other membranes	proton-transporting two-sector ATPase complex, catalytic domain [GO:0033178]	proton-transporting two-sector ATPase complex, catalytic domain [GO:0033178]	transporter activity	proton-transporting ATPase activity, rotational mechanism [GO:0046961]	transporter activity	proton-transporting ATPase activity, rotational mechanism [GO:0046961];proton-transporting two-sector ATPase complex, catalytic domain [GO:0033178]	36	8	225	26	6.25
1.79113	0.0161758	-0.657843	A0A0R0JEV3	Uncharacterized protein			NA			NA		catalytic activity [GO:0003824]	catalytic activity [GO:0003824]	catalytic activity [GO:0003824]	6	2	568	62.1	8.27
2.35088	0.00445779	-0.661079	K7LM62	2-isopropylmalate synthase	other metabolic processes	leucine biosynthetic process [GO:0009098]	leucine biosynthetic process [GO:0009098]	other cell component	chloroplast [GO:0009507]	chloroplast [GO:0009507]	other molecular function	2-isopropylmalate synthase activity [GO:0003852]	2-isopropylmalate synthase activity [GO:0003852]	2-isopropylmalate synthase activity [GO:0003852];chloroplast [GO:0009507];leucine biosynthetic process [GO:0009098]	44	17	620	67.3	6.84
1.85116	0.0140878	-0.661848	A0A0R0K666	Peptidase A1 domain-containing protein	protein metabolism	protein catabolic process [GO:0030163];proteolysis [GO:0006508]	protein metabolism			NA	other molecular function	aspartic-type endopeptidase activity [GO:0004190]	aspartic-type endopeptidase activity [GO:0004190]	aspartic-type endopeptidase activity [GO:0004190];protein catabolic process [GO:0030163];proteolysis [GO:0006508]	46	10	440	47	8.12
1.80433	0.0156917	-0.662236	K7L8B5	Uncharacterized protein			NA			NA	other molecular function	calcium ion binding [GO:0005509]	calcium ion binding [GO:0005509]	calcium ion binding [GO:0005509]	43	8	137	15.3	4.64
1.73665	0.0183379	-0.665392	I1KQJ1	Mitogen-activated protein kinase	other metabolic processes;protein metabolism;signal transduction	intracellular signal transduction [GO:0035556];regulation of gene expression [GO:0010468]	protein metabolism	nucleus;other cell component	cytoplasm [GO:0005737];nucleus [GO:0005634]	nucleus	kinase activity;other molecular function	ATP binding [GO:0005524];MAP kinase activity [GO:0004707]	ATP binding [GO:0005524]	ATP binding [GO:0005524];cytoplasm [GO:0005737];intracellular signal transduction [GO:0035556];MAP kinase activity [GO:0004707];nucleus [GO:0005634];regulation of gene expression [GO:0010468]	19	6	589	66.6	8.02
1.67658	0.0210584	-0.666015	C6SVY4	Uncharacterized protein			NA			NA			NA		65	8	176	19.1	4.15
1.33965	0.0457457	-0.66639	I1JMF8	PKS_ER domain-containing protein			NA			NA	other molecular function	oxidoreductase activity [GO:0016491]	oxidoreductase activity [GO:0016491]	oxidoreductase activity [GO:0016491]	8	3	346	38.5	6.68
4.80402	1.57029e-05	-0.668326	Q8L7J5	Pyruvate kinase	other metabolic processes		other metabolic processes			NA	kinase activity;other molecular function	kinase activity [GO:0016301];magnesium ion binding [GO:0000287];potassium ion binding [GO:0030955];pyruvate kinase activity [GO:0004743]	kinase activity [GO:0016301]	kinase activity [GO:0016301];magnesium ion binding [GO:0000287];potassium ion binding [GO:0030955];pyruvate kinase activity [GO:0004743]	58	22	511	55.3	7.75
2.14421	0.00717441	-0.668743	I1L0W9	Uncharacterized protein			NA			NA	other molecular function	flavin adenine dinucleotide binding [GO:0050660];oxidoreductase activity, acting on the CH-CH group of donors [GO:0016627]	oxidoreductase activity	flavin adenine dinucleotide binding [GO:0050660];oxidoreductase activity, acting on the CH-CH group of donors [GO:0016627]	18	9	760	85.2	8.13
1.52979	0.0295263	-0.669511	A0A0R4J3P1	Glutamine synthetase	other metabolic processes	glutamine biosynthetic process [GO:0006542]	glutamine biosynthetic process [GO:0006542]	other cell component		other cell component	other molecular function	ATP binding [GO:0005524];glutamate-ammonia ligase activity [GO:0004356]	ATP binding [GO:0005524]	ATP binding [GO:0005524];glutamate-ammonia ligase activity [GO:0004356];glutamine biosynthetic process [GO:0006542]	51	13	356	39.1	5.48
1.79292	0.0161094	-0.676221	K7MJ53	Uncharacterized protein			NA			NA			NA		13	2	208	23.3	5.58
3.11517	0.000767068	-0.679691	I1LY75	Ubiquinone biosynthesis protein	other metabolic processes	ubiquinone biosynthetic process [GO:0006744]	ubiquinone biosynthetic process [GO:0006744]	mitochondrion;other membranes	mitochondrial inner membrane [GO:0005743]	mitochondrion	other molecular function	lipid binding [GO:0008289]	lipid binding [GO:0008289]	lipid binding [GO:0008289];mitochondrial inner membrane [GO:0005743];ubiquinone biosynthetic process [GO:0006744]	42	6	306	33.9	6.38
2.10646	0.00782608	-0.680729	K7K9Y5	HECT-type E3 ubiquitin transferase	other biological processes;other metabolic processes;protein metabolism	protein ubiquitination [GO:0016567]	protein metabolism	other cell component	cytoplasm [GO:0005737]	cytoplasm [GO:0005737]	other molecular function	ubiquitin protein ligase activity [GO:0061630]	ubiquitin protein ligase activity [GO:0061630]	cytoplasm [GO:0005737];protein ubiquitination [GO:0016567];ubiquitin protein ligase activity [GO:0061630]	9	19	3649	401.4	5.27
2.54477	0.0028525	-0.68445	I1M4Y9	Omp85 domain-containing protein	cell organization and biogenesis;transport	chloroplast organization [GO:0009658];protein import into chloroplast stroma [GO:0045037];response to cytokinin [GO:0009735]	cell organization and biogenesis	mitochondrion;other membranes	chloroplast outer membrane [GO:0009707];integral component of chloroplast outer membrane [GO:0031359]	mitochondrion	transporter activity	P-P-bond-hydrolysis-driven protein transmembrane transporter activity [GO:0015450]	transporter activity	chloroplast organization [GO:0009658];chloroplast outer membrane [GO:0009707];integral component of chloroplast outer membrane [GO:0031359];P-P-bond-hydrolysis-driven protein transmembrane transporter activity [GO:0015450];protein import into chloroplast stroma [GO:0045037];response to cytokinin [GO:0009735]	33	17	800	87.5	7.58
1.61325	0.0243642	-0.692002	C6TD30	NmrA domain-containing protein			NA			NA	other molecular function		other molecular function		42	9	318	35.5	5.48
1.6598	0.0218877	-0.694025	A0A0R4J4E6	J domain-containing protein			NA			NA			NA		10	2	410	45.3	6.58
1.65669	0.0220452	-0.698741	I1MTH5	1-deoxy-D-xylulose-5-phosphate reductoisomerase	other metabolic processes	isopentenyl diphosphate biosynthetic process, methylerythritol 4-phosphate pathway involved in terpenoid biosynthetic process [GO:0051484]	NA			NA	other molecular function	1-deoxy-D-xylulose-5-phosphate reductoisomerase activity [GO:0030604];manganese ion binding [GO:0030145];NADPH binding [GO:0070402]	manganese ion binding [GO:0030145]	1-deoxy-D-xylulose-5-phosphate reductoisomerase activity [GO:0030604];isopentenyl diphosphate biosynthetic process, methylerythritol 4-phosphate pathway involved in terpenoid biosynthetic process [GO:0051484];manganese ion binding [GO:0030145];NADPH binding [GO:0070402]	31	9	474	51.4	6.09
2.42383	0.00376848	-0.699889	I1MYM9	Uncharacterized protein			NA	other membranes	integral component of membrane [GO:0016021]	integral component of membrane [GO:0016021]			NA	integral component of membrane [GO:0016021]	12	3	399	45.8	8.07
1.34394	0.0452963	-0.71004	Q43465	Protein kinase 2	other metabolic processes;protein metabolism;signal transduction	intracellular signal transduction [GO:0035556];protein phosphorylation [GO:0006468]	protein metabolism	nucleus;other cell component	cytoplasm [GO:0005737];nucleus [GO:0005634]	nucleus	kinase activity;other molecular function	ATP binding [GO:0005524];protein serine/threonine kinase activity [GO:0004674]	ATP binding [GO:0005524]	ATP binding [GO:0005524];cytoplasm [GO:0005737];intracellular signal transduction [GO:0035556];nucleus [GO:0005634];protein phosphorylation [GO:0006468];protein serine/threonine kinase activity [GO:0004674]	13	3	339	38.6	6.86
1.34065	0.0456404	-0.710187	C6TMZ4	Fe2OG dioxygenase domain-containing protein			NA			NA	other molecular function	metal ion binding [GO:0046872];oxidoreductase activity [GO:0016491]	metal ion binding [GO:0046872]	metal ion binding [GO:0046872];oxidoreductase activity [GO:0016491]	26	4	318	36	5.38
2.88554	0.00130155	-0.713003	C6SVW6	Uncharacterized protein	other metabolic processes		other metabolic processes			NA			NA		14	3	235	26.6	6.23
2.64463	0.00226656	-0.715508	O23958	Metallothionein-II protein			NA			NA	other molecular function	zinc ion binding [GO:0008270]	zinc ion binding [GO:0008270]	zinc ion binding [GO:0008270]	89	5	85	8.1	6.95
1.7923	0.0161324	-0.717766	I1JZ02	Uncharacterized protein	other metabolic processes		other metabolic processes	ER/Golgi;other cell component;other cytoplasmic organelle;other membranes	endosome [GO:0005768];integral component of membrane [GO:0016021];trans-Golgi network [GO:0005802]	ER/Golgi	other molecular function	methyltransferase activity [GO:0008168]	methyltransferase activity [GO:0008168]	endosome [GO:0005768];integral component of membrane [GO:0016021];methyltransferase activity [GO:0008168];trans-Golgi network [GO:0005802]	4	2	834	93.5	5.35
3.02463	0.000944874	-0.718537	C6TN36	Glyceraldehyde-3-phosphate dehydrogenase	other metabolic processes	glucose metabolic process [GO:0006006];glycolytic process [GO:0006096]	glycolytic process [GO:0006096]	cytosol	cytosol [GO:0005829]	cytosol	other molecular function	glyceraldehyde-3-phosphate dehydrogenase (NAD+) (phosphorylating) activity [GO:0004365];NAD binding [GO:0051287];NADP binding [GO:0050661]	NADP binding [GO:0050661]	cytosol [GO:0005829];glucose metabolic process [GO:0006006];glyceraldehyde-3-phosphate dehydrogenase (NAD+) (phosphorylating) activity [GO:0004365];glycolytic process [GO:0006096];NAD binding [GO:0051287];NADP binding [GO:0050661]	72	17	340	37	7.47
1.62999	0.0234427	-0.720487	C6T298	PPM-type phosphatase domain-containing protein	other metabolic processes;protein metabolism		protein metabolism			NA	other molecular function	protein serine/threonine phosphatase activity [GO:0004722]	protein serine/threonine phosphatase activity [GO:0004722]	protein serine/threonine phosphatase activity [GO:0004722]	29	5	221	24.3	6.9
1.80922	0.0155161	-0.723044	C6TD43	PKS_ER domain-containing protein			NA			NA	other molecular function	oxidoreductase activity [GO:0016491]	oxidoreductase activity [GO:0016491]	oxidoreductase activity [GO:0016491]	25	7	342	37.8	7.09
2.55826	0.00276529	-0.724554	K7MTZ4	Epimerase domain-containing protein			NA			NA	other molecular function	coenzyme binding [GO:0050662];oxidoreductase activity [GO:0016491];oxidoreductase activity, acting on the CH-OH group of donors, NAD or NADP as acceptor [GO:0016616]	coenzyme binding [GO:0050662]	coenzyme binding [GO:0050662];oxidoreductase activity [GO:0016491];oxidoreductase activity, acting on the CH-OH group of donors, NAD or NADP as acceptor [GO:0016616]	33	8	372	41	6.9
1.49895	0.0316996	-0.725945	K7MNJ0	GH10 domain-containing protein	other metabolic processes	carbohydrate metabolic process [GO:0005975]	carbohydrate metabolic process [GO:0005975]			NA	other molecular function	hydrolase activity, hydrolyzing O-glycosyl compounds [GO:0004553]	hydrolase activity, hydrolyzing O-glycosyl compounds [GO:0004553]	carbohydrate metabolic process [GO:0005975];hydrolase activity, hydrolyzing O-glycosyl compounds [GO:0004553]	7	5	931	103.3	6.92
2.14298	0.00719489	-0.728173	I1NA14	TPR_REGION domain-containing protein			NA	other membranes		other membranes			NA		14	3	351	39.9	6.48
2.36665	0.00429881	-0.730945	I1KAS1	Pectinesterase	cell organization and biogenesis;other biological processes;other metabolic processes	cell wall modification [GO:0042545];pectin catabolic process [GO:0045490]	cell organization and biogenesis	other cell component;other membranes	integral component of membrane [GO:0016021]	integral component of membrane [GO:0016021]	enzyme regulator activity;other molecular function	aspartyl esterase activity [GO:0045330];pectinesterase activity [GO:0030599];pectinesterase inhibitor activity [GO:0046910]	pectinesterase activity [GO:0030599]	aspartyl esterase activity [GO:0045330];cell wall modification [GO:0042545];integral component of membrane [GO:0016021];pectin catabolic process [GO:0045490];pectinesterase activity [GO:0030599];pectinesterase inhibitor activity [GO:0046910]	4	2	584	64.3	9
1.60591	0.0247793	-0.738801	C6TME1	Uncharacterized protein			NA	ER/Golgi;other membranes	endoplasmic reticulum [GO:0005783];integral component of membrane [GO:0016021]	ER/Golgi	other molecular function	ketoreductase activity [GO:0045703]	ketoreductase activity [GO:0045703]	endoplasmic reticulum [GO:0005783];integral component of membrane [GO:0016021];ketoreductase activity [GO:0045703]	32	9	320	35.8	9.58
1.47431	0.0335495	-0.739993	A0A0R0EDI1	PPM-type phosphatase domain-containing protein	other metabolic processes;protein metabolism		protein metabolism			NA	other molecular function	magnesium-dependent protein serine/threonine phosphatase activity [GO:0004724];protein serine/threonine phosphatase activity [GO:0004722]	NA	magnesium-dependent protein serine/threonine phosphatase activity [GO:0004724];protein serine/threonine phosphatase activity [GO:0004722]	12	3	282	30.9	7.06
1.54742	0.028352	-0.746384	A0A088AWT5	Gamma-glutamyl transferase	other metabolic processes;protein metabolism	glutathione catabolic process [GO:0006751]	protein metabolism	other membranes	integral component of membrane [GO:0016021]	integral component of membrane [GO:0016021]	other molecular function	glutathione hydrolase activity [GO:0036374];transferase activity [GO:0016740]	glutathione hydrolase activity [GO:0036374]	glutathione catabolic process [GO:0006751];glutathione hydrolase activity [GO:0036374];integral component of membrane [GO:0016021];transferase activity [GO:0016740]	9	3	578	62.3	6.15
5.37275	4.23887e-06	-0.747982	I1N5R9	Formate dehydrogenase, mitochondrial	other metabolic processes	formate catabolic process [GO:0042183]	formate catabolic process [GO:0042183]	mitochondrion;other cell component	chloroplast [GO:0009507];mitochondrion [GO:0005739]	mitochondrion	other molecular function	formate dehydrogenase (NAD+) activity [GO:0008863];NAD binding [GO:0051287];oxidoreductase activity, acting on the CH-OH group of donors, NAD or NADP as acceptor [GO:0016616]	NAD binding [GO:0051287]	chloroplast [GO:0009507];formate catabolic process [GO:0042183];formate dehydrogenase (NAD+) activity [GO:0008863];mitochondrion [GO:0005739];NAD binding [GO:0051287];oxidoreductase activity, acting on the CH-OH group of donors, NAD or NADP as acceptor [GO:0016616]	71	18	375	41.3	7.34
3.16663	0.000681346	-0.748696	I1J6Z7	Aldo_ket_red domain-containing protein			NA	cytosol	cytosol [GO:0005829]	cytosol	other molecular function	alcohol dehydrogenase (NADP+) activity [GO:0008106];alditol:NADP+ 1-oxidoreductase activity [GO:0004032];oxidoreductase activity [GO:0016491]	oxidoreductase activity [GO:0016491]	alcohol dehydrogenase (NADP+) activity [GO:0008106];alditol:NADP+ 1-oxidoreductase activity [GO:0004032];cytosol [GO:0005829];oxidoreductase activity [GO:0016491]	70	19	313	34.9	6.65
2.56666	0.00271231	-0.749147	I1N5R6	PKS_ER domain-containing protein			NA			NA	other molecular function	oxidoreductase activity [GO:0016491];zinc ion binding [GO:0008270]	zinc ion binding [GO:0008270]	oxidoreductase activity [GO:0016491];zinc ion binding [GO:0008270]	23	6	320	34.3	5.74
1.33781	0.0459397	-0.754005	C6TC09	Uncharacterized protein			NA	other membranes	integral component of membrane [GO:0016021]	integral component of membrane [GO:0016021]			NA	integral component of membrane [GO:0016021]	11	2	282	31.5	9.54
1.36221	0.0434303	-0.757064	C6T7V2	Lactamase_B domain-containing protein			NA			NA			NA		8	2	322	36	6.46
1.51108	0.0308261	-0.757576	I1J4S9	RRM domain-containing protein			NA			NA	nucleic acid binding activity	RNA binding [GO:0003723]	RNA binding [GO:0003723]	RNA binding [GO:0003723]	29	9	279	29.8	6.4
2.47738	0.00333134	-0.764536	I1JET8	Uncharacterized protein	other metabolic processes;protein metabolism	fucosylation [GO:0036065];protein glycosylation [GO:0006486]	protein metabolism	ER/Golgi;other membranes	Golgi cisterna membrane [GO:0032580];integral component of membrane [GO:0016021]	ER/Golgi	other molecular function	alpha-(1->3)-fucosyltransferase activity [GO:0046920]	alpha-(1->3)-fucosyltransferase activity [GO:0046920]	alpha-(1->3)-fucosyltransferase activity [GO:0046920];fucosylation [GO:0036065];Golgi cisterna membrane [GO:0032580];integral component of membrane [GO:0016021];protein glycosylation [GO:0006486]	8	3	515	56.9	6.48
2.61238	0.00244127	-0.766901	I1MR83	DUF3700 domain-containing protein			NA			NA			NA		47	7	236	25.5	5.6
1.88443	0.0130487	-0.768208	I1KZW8	PAP_fibrillin domain-containing protein			NA			NA			NA		33	7	312	33.6	5.31
3.45021	0.000354643	-0.768829	I1KS01	Lipoxygenase	other metabolic processes	oxylipin biosynthetic process [GO:0031408]	oxylipin biosynthetic process [GO:0031408]	other cell component		other cell component	other molecular function	metal ion binding [GO:0046872];oxidoreductase activity, acting on single donors with incorporation of molecular oxygen, incorporation of two atoms of oxygen [GO:0016702]	metal ion binding [GO:0046872]	metal ion binding [GO:0046872];oxidoreductase activity, acting on single donors with incorporation of molecular oxygen, incorporation of two atoms of oxygen [GO:0016702];oxylipin biosynthetic process [GO:0031408]	7	5	921	103.6	7.97
1.4811	0.0330296	-0.768898	I1JUY7	ATP-dependent 6-phosphofructokinase	other metabolic processes	fructose 6-phosphate metabolic process [GO:0006002]	fructose 6-phosphate metabolic process [GO:0006002]	other cell component	cytoplasm [GO:0005737]	cytoplasm [GO:0005737]	kinase activity;other molecular function	6-phosphofructokinase activity [GO:0003872];ATP binding [GO:0005524];metal ion binding [GO:0046872]	ATP binding [GO:0005524]	6-phosphofructokinase activity [GO:0003872];ATP binding [GO:0005524];cytoplasm [GO:0005737];fructose 6-phosphate metabolic process [GO:0006002];metal ion binding [GO:0046872]	32	11	509	56	6.8
2.20891	0.00618138	-0.769447	I1K6M2	Uncharacterized protein	stress response	defense response [GO:0006952]	stress response	non-structural extracellular	extracellular region [GO:0005576]	non-structural extracellular			NA	defense response [GO:0006952];extracellular region [GO:0005576]	50	9	222	23.8	7.87
2.27622	0.00529401	-0.777769	I1N5S0	Formate dehydrogenase, mitochondrial	other metabolic processes	formate catabolic process [GO:0042183]	formate catabolic process [GO:0042183]	mitochondrion;other cell component	chloroplast [GO:0009507];mitochondrion [GO:0005739]	mitochondrion	other molecular function	formate dehydrogenase (NAD+) activity [GO:0008863];NAD binding [GO:0051287];oxidoreductase activity, acting on the CH-OH group of donors, NAD or NADP as acceptor [GO:0016616]	NAD binding [GO:0051287]	chloroplast [GO:0009507];formate catabolic process [GO:0042183];formate dehydrogenase (NAD+) activity [GO:0008863];mitochondrion [GO:0005739];NAD binding [GO:0051287];oxidoreductase activity, acting on the CH-OH group of donors, NAD or NADP as acceptor [GO:0016616]	68	15	389	42.8	6.77
2.00558	0.00987232	-0.779192	I1LUZ1	Uncharacterized protein			NA			NA			NA		14	5	586	64	5.53
1.68853	0.0204866	-0.779595	I1KIP9	3-hydroxyacyl-CoA dehydrogenase	other metabolic processes	fatty acid beta-oxidation [GO:0006635]	fatty acid beta-oxidation [GO:0006635]	other cytoplasmic organelle	peroxisome [GO:0005777]	peroxisome [GO:0005777]	other molecular function	3-hydroxyacyl-CoA dehydrogenase activity [GO:0003857]	3-hydroxyacyl-CoA dehydrogenase activity [GO:0003857]	3-hydroxyacyl-CoA dehydrogenase activity [GO:0003857];fatty acid beta-oxidation [GO:0006635];peroxisome [GO:0005777]	32	19	724	78.1	9.23
2.5982	0.00252232	-0.781568	I1K3K3	Urease	other metabolic processes	urea catabolic process [GO:0043419]	urea catabolic process [GO:0043419]	other cell component		other cell component	other molecular function	nickel cation binding [GO:0016151];urease activity [GO:0009039]	nickel cation binding [GO:0016151]	nickel cation binding [GO:0016151];urea catabolic process [GO:0043419];urease activity [GO:0009039]	51	28	839	90.3	6.07
1.78222	0.0165111	-0.784771	I1K7F5	MaoC-like domain-containing protein	other metabolic processes		other metabolic processes	other cytoplasmic organelle		other cytoplasmic organelle	other molecular function		other molecular function		13	3	308	34.1	8.53
3.87319	0.000133909	-0.786927	I1LZ19	Importin subunit alpha	transport	NLS-bearing protein import into nucleus [GO:0006607]	transport	nucleus;other cell component	cytosol [GO:0005829];nuclear pore [GO:0005643];nucleoplasm [GO:0005654]	nucleus	other molecular function	nuclear import signal receptor activity [GO:0061608];nuclear localization sequence binding [GO:0008139]	nuclear import signal receptor activity [GO:0061608]	cytosol [GO:0005829];NLS-bearing protein import into nucleus [GO:0006607];nuclear import signal receptor activity [GO:0061608];nuclear localization sequence binding [GO:0008139];nuclear pore [GO:0005643];nucleoplasm [GO:0005654]	11	4	517	55.8	5.52
2.0642	0.00862587	-0.801871	I1LCI3	Superoxide dismutase	other metabolic processes;stress response		stress response	other cell component	chloroplast nucleoid [GO:0042644]	chloroplast nucleoid [GO:0042644]	other molecular function	metal ion binding [GO:0046872];superoxide dismutase activity [GO:0004784]	metal ion binding [GO:0046872]	chloroplast nucleoid [GO:0042644];metal ion binding [GO:0046872];superoxide dismutase activity [GO:0004784]	39	7	244	27.5	5.66
2.76136	0.00173235	-0.802461	Q8RVH5	Basic 7S globulin 2	protein metabolism	protein catabolic process [GO:0030163];proteolysis [GO:0006508]	protein metabolism			NA	other molecular function	aspartic-type endopeptidase activity [GO:0004190];nutrient reservoir activity [GO:0045735]	NA	aspartic-type endopeptidase activity [GO:0004190];nutrient reservoir activity [GO:0045735];protein catabolic process [GO:0030163];proteolysis [GO:0006508]	42	8	433	47.2	8.25
3.15093	0.000706439	-0.802698	A0A0R4J598	Cystatin domain-containing protein	other biological processes		other biological processes			NA	enzyme regulator activity	cysteine-type endopeptidase inhibitor activity [GO:0004869]	enzyme regulator activity	cysteine-type endopeptidase inhibitor activity [GO:0004869]	29	2	112	12.4	9.03
2.1845	0.00653883	-0.809278	Q8L7J4	Pyruvate kinase	other metabolic processes		other metabolic processes			NA	kinase activity;other molecular function	kinase activity [GO:0016301];magnesium ion binding [GO:0000287];potassium ion binding [GO:0030955];pyruvate kinase activity [GO:0004743]	kinase activity [GO:0016301]	kinase activity [GO:0016301];magnesium ion binding [GO:0000287];potassium ion binding [GO:0030955];pyruvate kinase activity [GO:0004743]	56	21	510	55.3	7.34
2.20325	0.00626259	-0.811549	C6T9R6	Sialidase domain-containing protein			NA			NA			NA		10	2	354	39.4	8.6
2.04389	0.00903884	-0.813334	I1KC24	CBFD_NFYB_HMF domain-containing protein	other biological processes		other biological processes	nucleus	nucleus [GO:0005634]	nucleus	other molecular function	DNA-binding transcription factor activity [GO:0003700];protein heterodimerization activity [GO:0046982]	DNA-binding transcription factor activity [GO:0003700]	DNA-binding transcription factor activity [GO:0003700];nucleus [GO:0005634];protein heterodimerization activity [GO:0046982]	7	2	229	25	5.38
3.11433	0.000768543	-0.813613	I1JUN3	DAO domain-containing protein			NA			NA	other molecular function	sarcosine oxidase activity [GO:0008115]	sarcosine oxidase activity [GO:0008115]	sarcosine oxidase activity [GO:0008115]	31	7	395	44.1	7.62
1.44102	0.0362224	-0.814729	K7K6E0	Kinesin motor domain-containing protein	cell organization and biogenesis;other biological processes	chloroplast accumulation movement [GO:0009904];microtubule-based movement [GO:0007018]	cell organization and biogenesis		kinesin complex [GO:0005871];microtubule [GO:0005874]		cytoskeletal activity;other molecular function	ATP binding [GO:0005524];ATPase activity [GO:0016887];microtubule binding [GO:0008017];microtubule motor activity [GO:0003777]	ATP binding [GO:0005524]	ATP binding [GO:0005524];ATPase activity [GO:0016887];chloroplast accumulation movement [GO:0009904];kinesin complex [GO:0005871];microtubule [GO:0005874];microtubule binding [GO:0008017];microtubule motor activity [GO:0003777];microtubule-based movement [GO:0007018]	2	2	1280	142	7.01
3.02719	0.000939322	-0.816011	A0A0R0K8D9	Catalase	other biological processes;other metabolic processes;stress response	hydrogen peroxide catabolic process [GO:0042744];response to oxidative stress [GO:0006979]	stress response			NA	other molecular function	catalase activity [GO:0004096];heme binding [GO:0020037];metal ion binding [GO:0046872]	heme binding [GO:0020037]	catalase activity [GO:0004096];heme binding [GO:0020037];hydrogen peroxide catabolic process [GO:0042744];metal ion binding [GO:0046872];response to oxidative stress [GO:0006979]	49	18	492	56.7	7.28
3.75508	0.000175761	-0.818348	C6SV68	Cysteine proteinase inhibitor	other biological processes		other biological processes			NA	enzyme regulator activity	cysteine-type endopeptidase inhibitor activity [GO:0004869]	enzyme regulator activity	cysteine-type endopeptidase inhibitor activity [GO:0004869]	32	3	103	11.4	6.06
1.57938	0.0263405	-0.822288	K7MP75	Uncharacterized protein	other biological processes	positive regulation of transcription by RNA polymerase II [GO:0045944]	positive regulation of transcription by RNA polymerase II [GO:0045944]	nucleus	nucleus [GO:0005634]	nucleus	nucleic acid binding activity;other molecular function	sequence-specific DNA binding [GO:0043565]	nucleic acid binding activity	nucleus [GO:0005634];positive regulation of transcription by RNA polymerase II [GO:0045944];sequence-specific DNA binding [GO:0043565]	2	2	962	108	5.58
1.31752	0.0481375	-0.832396	I1KV22	Malic enzyme	other metabolic processes	malate metabolic process [GO:0006108];pyruvate metabolic process [GO:0006090]	malate metabolic process [GO:0006108]	other cell component	chloroplast [GO:0009507]	chloroplast [GO:0009507]	other molecular function	malate dehydrogenase (decarboxylating) (NAD+) activity [GO:0004471];malate dehydrogenase (decarboxylating) (NADP+) activity [GO:0004473];malic enzyme activity [GO:0004470];metal ion binding [GO:0046872];NAD binding [GO:0051287]	metal ion binding [GO:0046872]	chloroplast [GO:0009507];malate dehydrogenase (decarboxylating) (NAD+) activity [GO:0004471];malate dehydrogenase (decarboxylating) (NADP+) activity [GO:0004473];malate metabolic process [GO:0006108];malic enzyme activity [GO:0004470];metal ion binding [GO:0046872];NAD binding [GO:0051287];pyruvate metabolic process [GO:0006090]	12	6	641	70.7	6.77
2.24823	0.00564633	-0.832611	I1N627	PHB domain-containing protein			NA			NA			NA		36	8	286	31.5	5.24
2.24435	0.005697	-0.83282	I1ML03	Uncharacterized protein			NA			NA	other molecular function	transferase activity, transferring acyl groups other than amino-acyl groups [GO:0016747]	transferase activity, transferring acyl groups other than amino-acyl groups [GO:0016747]	transferase activity, transferring acyl groups other than amino-acyl groups [GO:0016747]	11	3	459	50.7	8.02
1.44916	0.0355501	-0.845961	C6SXE0	CAAD domain-containing protein			NA	other membranes	chloroplast thylakoid membrane [GO:0009535];integral component of membrane [GO:0016021]	chloroplast			NA	chloroplast thylakoid membrane [GO:0009535];integral component of membrane [GO:0016021]	19	2	200	22	4.77
2.53201	0.00293758	-0.852523	I1M307	Bulb-type lectin domain-containing protein			NA			NA			NA		21	8	435	48.8	6.64
3.41778	0.000382139	-0.85411	P01071	Trypsin inhibitor B	other biological processes		other biological processes			NA	enzyme regulator activity	serine-type endopeptidase inhibitor activity [GO:0004867]	enzyme regulator activity	serine-type endopeptidase inhibitor activity [GO:0004867]	73	13	181	20	4.82
1.38983	0.0407541	-0.858965	C6T586	Uncharacterized protein	other biological processes		other biological processes			NA	enzyme regulator activity	endopeptidase inhibitor activity [GO:0004866]	enzyme regulator activity	endopeptidase inhibitor activity [GO:0004866]	14	2	207	22.7	5.58
1.78168	0.0165317	-0.860943	B3GJZ6	Chilling-induced protein			NA			NA			NA		23	2	129	13.9	6.79
2.01797	0.00959461	-0.868549	K7LH11	Uncharacterized protein	other metabolic processes	biosynthetic process [GO:0009058]	biosynthetic process [GO:0009058]	other cell component		other cell component	other molecular function	catalytic activity [GO:0003824]	catalytic activity [GO:0003824]	biosynthetic process [GO:0009058];catalytic activity [GO:0003824]	12	2	294	31.6	4.98
3.21607	0.000608044	-0.8719	Q9LLQ6	Seed maturation protein PM34			NA			NA	other molecular function	oxidoreductase activity [GO:0016491]	oxidoreductase activity [GO:0016491]	oxidoreductase activity [GO:0016491]	65	14	293	31.7	7.08
3.66216	0.000217693	-0.875688	I1M4L1	Uncharacterized protein	other metabolic processes	isopentenyl diphosphate biosynthetic process, methylerythritol 4-phosphate pathway [GO:0019288];terpenoid biosynthetic process [GO:0016114]	NA	other cell component	chloroplast [GO:0009507]	chloroplast [GO:0009507]	other molecular function	4-hydroxy-3-methylbut-2-en-1-yl diphosphate synthase activity [GO:0046429];iron ion binding [GO:0005506]	iron ion binding [GO:0005506]	4-hydroxy-3-methylbut-2-en-1-yl diphosphate synthase activity [GO:0046429];chloroplast [GO:0009507];iron ion binding [GO:0005506];isopentenyl diphosphate biosynthetic process, methylerythritol 4-phosphate pathway [GO:0019288];terpenoid biosynthetic process [GO:0016114]	21	12	742	82.4	6.39
3.01952	0.000956058	-0.883661	I1MYB0	Uncharacterized protein			NA			NA	other molecular function	selenium binding [GO:0008430]	selenium binding [GO:0008430]	selenium binding [GO:0008430]	49	17	484	53.4	6.09
1.33001	0.0467722	-0.883986	C6TK94	Uncharacterized protein			NA			NA			NA		16	5	418	45.6	5.66
2.51086	0.00308416	-0.887917	Q03773	Glucan endo-1,3-beta-glucosidase	other metabolic processes;stress response	carbohydrate metabolic process [GO:0005975];defense response [GO:0006952]	stress response	other cell component;other cytoplasmic organelle;other membranes;plasma membrane	anchored component of plasma membrane [GO:0046658];cell wall [GO:0005618];vacuole [GO:0005773]	plasma membrane	other molecular function	glucan endo-1,3-beta-D-glucosidase activity [GO:0042973]	glucan endo-1,3-beta-D-glucosidase activity [GO:0042973]	anchored component of plasma membrane [GO:0046658];carbohydrate metabolic process [GO:0005975];cell wall [GO:0005618];defense response [GO:0006952];glucan endo-1,3-beta-D-glucosidase activity [GO:0042973];vacuole [GO:0005773]	68	18	347	38.1	8.69
1.55742	0.0277065	-0.890336	A0A0R0IIZ3	Uncharacterized protein	other metabolic processes	carbohydrate metabolic process [GO:0005975]	carbohydrate metabolic process [GO:0005975]			NA	other molecular function	beta-glucosidase activity [GO:0008422]	beta-glucosidase activity [GO:0008422]	beta-glucosidase activity [GO:0008422];carbohydrate metabolic process [GO:0005975]	10	5	506	57.8	9.19
2.13489	0.0073301	-0.893923	I1J7H3	Ferritin	other biological processes;transport	flower development [GO:0009908];intracellular sequestering of iron ion [GO:0006880];iron ion transport [GO:0006826];leaf development [GO:0048366];photosynthesis [GO:0015979];response to iron ion [GO:0010039];response to reactive oxygen species [GO:0000302]	transport	other cell component	chloroplast [GO:0009507];chloroplast envelope [GO:0009941];chloroplast stroma [GO:0009570];chloroplast thylakoid membrane [GO:0009535];cytoplasm [GO:0005737];membrane [GO:0016020];mitochondrion [GO:0005739];thylakoid [GO:0009579]	chloroplast	other molecular function	ferric iron binding [GO:0008199];ferrous iron binding [GO:0008198];ferroxidase activity [GO:0004322];identical protein binding [GO:0042802];iron ion binding [GO:0005506]	ferric iron binding [GO:0008199]	chloroplast [GO:0009507];chloroplast envelope [GO:0009941];chloroplast stroma [GO:0009570];chloroplast thylakoid membrane [GO:0009535];cytoplasm [GO:0005737];ferric iron binding [GO:0008199];ferrous iron binding [GO:0008198];ferroxidase activity [GO:0004322];flower development [GO:0009908];identical protein binding [GO:0042802];intracellular sequestering of iron ion [GO:0006880];iron ion binding …	23	4	257	28.7	6.18
2.45601	0.00349936	-0.90325	I1MT10	Uncharacterized protein	other biological processes;stress response	cellular response to heat [GO:0034605];cellular response to unfolded protein [GO:0034620];chaperone cofactor-dependent protein refolding [GO:0051085];protein refolding [GO:0042026];response to unfolded protein [GO:0006986]	stress response	other cell component	cytoplasm [GO:0005737]	cytoplasm [GO:0005737]	other molecular function	ATP binding [GO:0005524];ATPase activity [GO:0016887];ATPase activity, coupled [GO:0042623];heat shock protein binding [GO:0031072];misfolded protein binding [GO:0051787];protein folding chaperone [GO:0044183];unfolded protein binding [GO:0051082]	ATP binding [GO:0005524]	ATP binding [GO:0005524];ATPase activity [GO:0016887];ATPase activity, coupled [GO:0042623];cellular response to heat [GO:0034605];cellular response to unfolded protein [GO:0034620];chaperone cofactor-dependent protein refolding [GO:0051085];cytoplasm [GO:0005737];heat shock protein binding [GO:0031072];misfolded protein binding [GO:0051787];protein folding chaperone [GO:0044183];protein refoldin…	54	22	645	70.8	5.39
2.87447	0.00133514	-0.904452	A0A0R4J3M4	Pyruvate decarboxylase			NA	cytosol	cytosol [GO:0005829]	cytosol	other molecular function	carboxy-lyase activity [GO:0016831];magnesium ion binding [GO:0000287];thiamine pyrophosphate binding [GO:0030976]	magnesium ion binding [GO:0000287]	carboxy-lyase activity [GO:0016831];cytosol [GO:0005829];magnesium ion binding [GO:0000287];thiamine pyrophosphate binding [GO:0030976]	41	15	607	65.1	6.27
2.85729	0.00138903	-0.912702	C6TIE2	AB hydrolase-1 domain-containing protein			NA			NA	other molecular function	catalytic activity [GO:0003824]	catalytic activity [GO:0003824]	catalytic activity [GO:0003824]	34	8	314	35.3	5.3
2.40889	0.0039004	-0.915306	Q39839	Nucleoside diphosphate kinase 1	other metabolic processes	CTP biosynthetic process [GO:0006241];GTP biosynthetic process [GO:0006183];UTP biosynthetic process [GO:0006228]	NA			NA	kinase activity;other molecular function	ATP binding [GO:0005524];metal ion binding [GO:0046872];nucleoside diphosphate kinase activity [GO:0004550]	ATP binding [GO:0005524]	ATP binding [GO:0005524];CTP biosynthetic process [GO:0006241];GTP biosynthetic process [GO:0006183];metal ion binding [GO:0046872];nucleoside diphosphate kinase activity [GO:0004550];UTP biosynthetic process [GO:0006228]	63	9	149	16.4	6.32
2.68695	0.00205612	-0.916694	I1J8T1	NmrA domain-containing protein			NA			NA	other molecular function		other molecular function		41	8	307	33.7	6.37
1.47426	0.0335535	-0.926606	I1NDV2	AMP-binding domain-containing protein	other metabolic processes		other metabolic processes	ER/Golgi;other membranes		ER/Golgi	other molecular function	catalytic activity [GO:0003824]	catalytic activity [GO:0003824]	catalytic activity [GO:0003824]	9	5	674	74.3	6.98
1.79823	0.0159136	-0.927221	C6TID4	PKS_ER domain-containing protein			NA	cytosol	cytosol [GO:0005829]	cytosol	other molecular function	oxidoreductase activity [GO:0016491]	oxidoreductase activity [GO:0016491]	cytosol [GO:0005829];oxidoreductase activity [GO:0016491]	24	5	325	34.5	6.24
1.52859	0.0296083	-0.92865	A0A0R0F259	Pyruvate decarboxylase			NA	cytosol	cytosol [GO:0005829]	cytosol	other molecular function	carboxy-lyase activity [GO:0016831];magnesium ion binding [GO:0000287];thiamine pyrophosphate binding [GO:0030976]	magnesium ion binding [GO:0000287]	carboxy-lyase activity [GO:0016831];cytosol [GO:0005829];magnesium ion binding [GO:0000287];thiamine pyrophosphate binding [GO:0030976]	41	14	608	65.2	6.21
2.72892	0.00186674	-0.934215	I1LDP2	Uncharacterized protein			NA	other membranes	integral component of membrane [GO:0016021]	integral component of membrane [GO:0016021]			NA	integral component of membrane [GO:0016021]	16	4	249	27.9	8.92
3.08587	0.000820603	-0.93485	A0A0R0E8N5	Uricase	other metabolic processes	purine nucleobase metabolic process [GO:0006144];urate catabolic process [GO:0019628]	NA	other cytoplasmic organelle	peroxisome [GO:0005777]	peroxisome [GO:0005777]	other molecular function	urate oxidase activity [GO:0004846]	urate oxidase activity [GO:0004846]	peroxisome [GO:0005777];purine nucleobase metabolic process [GO:0006144];urate catabolic process [GO:0019628];urate oxidase activity [GO:0004846]	47	11	309	35.1	8.29
2.56707	0.00270975	-0.940712	C6TLC9	Annexin			NA			NA	other molecular function	calcium ion binding [GO:0005509];calcium-dependent phospholipid binding [GO:0005544]	calcium ion binding [GO:0005509]	calcium ion binding [GO:0005509];calcium-dependent phospholipid binding [GO:0005544]	24	5	317	35.4	8.9
2.79354	0.00160866	-0.945453	K7KMV4	Uncharacterized protein	other biological processes	regulation of gene expression [GO:0010468]	regulation of gene expression [GO:0010468]	other cytoplasmic organelle	peroxisome [GO:0005777]	peroxisome [GO:0005777]			NA	peroxisome [GO:0005777];regulation of gene expression [GO:0010468]	3	2	1126	124.2	5.91
2.27506	0.00530811	-0.946881	I1MJ34	Tau class glutathione S-transferase	other metabolic processes	glutathione metabolic process [GO:0006749]	glutathione metabolic process [GO:0006749]	other cell component	cytoplasm [GO:0005737]	cytoplasm [GO:0005737]	other molecular function	glutathione transferase activity [GO:0004364]	glutathione transferase activity [GO:0004364]	cytoplasm [GO:0005737];glutathione metabolic process [GO:0006749];glutathione transferase activity [GO:0004364]	42	9	219	25.5	6.61
2.91087	0.00122781	-0.950116	I1L3K7	Phosphopyruvate hydratase	other biological processes;other metabolic processes	glycolytic process [GO:0006096]	glycolytic process [GO:0006096]	cytosol	phosphopyruvate hydratase complex [GO:0000015]	cytosol	other molecular function	magnesium ion binding [GO:0000287];phosphopyruvate hydratase activity [GO:0004634]	magnesium ion binding [GO:0000287]	glycolytic process [GO:0006096];magnesium ion binding [GO:0000287];phosphopyruvate hydratase activity [GO:0004634];phosphopyruvate hydratase complex [GO:0000015]	60	17	445	48	6.29
2.88995	0.00128839	-0.952655	A0A0R0JL19	Uncharacterized protein	other metabolic processes	formaldehyde catabolic process [GO:0046294]	formaldehyde catabolic process [GO:0046294]	cytosol	cytosol [GO:0005829]	cytosol	other molecular function	alcohol dehydrogenase activity, zinc-dependent [GO:0004024];S-(hydroxymethyl)glutathione dehydrogenase activity [GO:0051903];zinc ion binding [GO:0008270]	zinc ion binding [GO:0008270]	alcohol dehydrogenase activity, zinc-dependent [GO:0004024];cytosol [GO:0005829];formaldehyde catabolic process [GO:0046294];S-(hydroxymethyl)glutathione dehydrogenase activity [GO:0051903];zinc ion binding [GO:0008270]	66	21	381	41	6.4
1.33642	0.0460868	-0.956461	K7L948	UBX domain-containing protein			NA			NA			NA		11	3	468	52.2	5.05
2.29207	0.00510424	-0.957393	A0A0R0G163	Sucrose synthase	other metabolic processes	sucrose metabolic process [GO:0005985]	sucrose metabolic process [GO:0005985]			NA	other molecular function	sucrose synthase activity [GO:0016157]	sucrose synthase activity [GO:0016157]	sucrose metabolic process [GO:0005985];sucrose synthase activity [GO:0016157]	11	6	750	85.5	6.1
2.23124	0.00587163	-0.958098	I1KK68	Uncharacterized protein	other metabolic processes	glutathione metabolic process [GO:0006749]	glutathione metabolic process [GO:0006749]	other cell component	cytoplasm [GO:0005737]	cytoplasm [GO:0005737]	other molecular function	glutathione transferase activity [GO:0004364]	glutathione transferase activity [GO:0004364]	cytoplasm [GO:0005737];glutathione metabolic process [GO:0006749];glutathione transferase activity [GO:0004364]	32	6	225	25.9	6.15
3.37369	0.00042297	-0.960516	A0A0R0J475	Uncharacterized protein			NA			NA			NA		17	8	704	79.2	7.69
2.96309	0.00108869	-0.965891	I1KRJ7	Peroxiredoxin	other biological processes	cell redox homeostasis [GO:0045454];cellular response to oxidative stress [GO:0034599];hydrogen peroxide catabolic process [GO:0042744]	redox	cytosol;mitochondrion	cytosol [GO:0005829]	cytosol	other molecular function	peroxidase activity [GO:0004601];peroxiredoxin activity [GO:0051920]	peroxidase activity [GO:0004601]	cell redox homeostasis [GO:0045454];cellular response to oxidative stress [GO:0034599];cytosol [GO:0005829];hydrogen peroxide catabolic process [GO:0042744];peroxidase activity [GO:0004601];peroxiredoxin activity [GO:0051920]	66	9	218	24.4	6.92
5.0472	8.9701e-06	-0.967456	I1KTW3	Succinate-semialdehyde dehydrogenase	other metabolic processes	gamma-aminobutyric acid catabolic process [GO:0009450]	gamma-aminobutyric acid catabolic process [GO:0009450]	mitochondrion	mitochondrion [GO:0005739]	mitochondrion	other molecular function	succinate-semialdehyde dehydrogenase (NAD+) activity [GO:0004777];succinate-semialdehyde dehydrogenase [NAD(P)+] activity [GO:0009013]	NA	gamma-aminobutyric acid catabolic process [GO:0009450];mitochondrion [GO:0005739];succinate-semialdehyde dehydrogenase (NAD+) activity [GO:0004777];succinate-semialdehyde dehydrogenase [NAD(P)+] activity [GO:0009013]	26	10	537	57.6	7.59
3.7013	0.00019893	-0.9702	A0A0R0I1Y1	F-box domain-containing protein			NA			NA			NA		23	4	263	29.8	5.96
1.54195	0.0287113	-0.971882	C6T1W3	Uncharacterized protein			NA			NA	other molecular function	metal ion binding [GO:0046872]	metal ion binding [GO:0046872]	metal ion binding [GO:0046872]	32	3	113	12.6	6.87
2.09243	0.008083	-0.971911	I1M222	Uncharacterized protein			NA			NA			NA		24	5	233	25.6	5.68
3.16006	0.000691735	-0.973119	Q9XET0	Seed maturation protein PM30			NA			NA			NA		38	5	140	15.1	8.9
1.77847	0.0166546	-0.989775	I1J626	Uncharacterized protein			NA			NA			NA		9	5	646	73.1	7.87
2.75297	0.00176616	-0.993491	Q00M86	N-hydroxycinnamoyl/benzoyltransferase 4			NA			NA	other molecular function	transferase activity, transferring acyl groups other than amino-acyl groups [GO:0016747]	transferase activity, transferring acyl groups other than amino-acyl groups [GO:0016747]	transferase activity, transferring acyl groups other than amino-acyl groups [GO:0016747]	6	2	469	52.5	6.98
3.10203	0.000790621	-0.993695	A0A0R0EQT1	Superoxide dismutase	other metabolic processes;stress response		stress response			NA	other molecular function	metal ion binding [GO:0046872];superoxide dismutase activity [GO:0004784]	metal ion binding [GO:0046872]	metal ion binding [GO:0046872];superoxide dismutase activity [GO:0004784]	32	6	248	27.8	5.87
4.1982	6.33579e-05	-1.00453	I1J7G5	Uncharacterized protein			NA			NA			NA		54	8	170	18.6	5.02
2.10659	0.00782366	-1.00578	I1KDR0	Uncharacterized protein	cell organization and biogenesis	proteasome assembly [GO:0043248]	cell organization and biogenesis		proteasome regulatory particle, base subcomplex [GO:0008540]	proteasome regulatory particle, base subcomplex [GO:0008540]			NA	proteasome assembly [GO:0043248];proteasome regulatory particle, base subcomplex [GO:0008540]	50	13	525	57.1	5.39
1.65719	0.0220198	-1.00972	K7LNG2	NmrA domain-containing protein			NA	other membranes	integral component of membrane [GO:0016021]	integral component of membrane [GO:0016021]	other molecular function		other molecular function	integral component of membrane [GO:0016021]	32	8	376	41.8	8.21
2.42303	0.00377543	-1.01435	Q39801	51 kDa seed maturation protein			NA			NA			NA		16	6	473	51	7.11
1.43763	0.0365068	-1.01534	C6T9D7	UDP-glucose 4-epimerase	other metabolic processes;RNA metabolism OR transcription	galactose catabolic process [GO:0019388];galactose catabolic process via UDP-galactose [GO:0033499]	RNA metabolism OR transcription	cytosol	cytosol [GO:0005829]	cytosol	nucleic acid binding activity;other molecular function	UDP-glucose 4-epimerase activity [GO:0003978]	nucleic acid binding activity	cytosol [GO:0005829];galactose catabolic process [GO:0019388];galactose catabolic process via UDP-galactose [GO:0033499];UDP-glucose 4-epimerase activity [GO:0003978]	13	4	350	39.1	7.77
1.76503	0.0171778	-1.0183	I1M6F2	Uncharacterized protein			NA	other membranes	integral component of membrane [GO:0016021]	integral component of membrane [GO:0016021]			NA	integral component of membrane [GO:0016021]	6	2	440	49	6.29
2.64458	0.00226682	-1.01843	I1L0S5	Uncharacterized protein	transport	ion transmembrane transport [GO:0034220]	transport	other membranes	integral component of chloroplast outer membrane [GO:0031359]	integral component of chloroplast outer membrane [GO:0031359]	transporter activity	amino acid transmembrane transporter activity [GO:0015171]	transporter activity	amino acid transmembrane transporter activity [GO:0015171];integral component of chloroplast outer membrane [GO:0031359];ion transmembrane transport [GO:0034220]	19	3	181	19	6.93
2.59264	0.00255484	-1.02454	I1J8U0	Uncharacterized protein			NA			NA			NA		19	4	431	45.6	6.37
1.47165	0.0337557	-1.0284	A0A0R0JE00	Uncharacterized protein	other metabolic processes		other metabolic processes	other cell component		other cell component	other molecular function		other molecular function		30	5	229	26.6	6.02
2.83273	0.00146982	-1.02862	A0A0R0IHE0	Uncharacterized protein	other metabolic processes;protein metabolism;stress response		stress response			NA			NA		9	5	755	84.4	5.92
3.93733	0.000115524	-1.03225	I1MGG5	Uncharacterized protein			NA			NA			NA		54	5	135	14.6	7.14
1.51453	0.0305824	-1.03248	A0A0R0KF48	Pyruvate decarboxylase			NA	cytosol		cytosol	other molecular function	carboxy-lyase activity [GO:0016831];magnesium ion binding [GO:0000287];thiamine pyrophosphate binding [GO:0030976]	magnesium ion binding [GO:0000287]	carboxy-lyase activity [GO:0016831];magnesium ion binding [GO:0000287];thiamine pyrophosphate binding [GO:0030976]	32	10	603	65.2	6.21
1.99747	0.0100585	-1.03644	I1LWI3	PHB domain-containing protein			NA			NA			NA		33	8	286	31.5	5.24
1.5721	0.0267852	-1.03959	I1NC50	Xpo1 domain-containing protein	transport	regulation of protein export from nucleus [GO:0046825]	transport	nucleus;other cell component	cytoplasm [GO:0005737];nucleus [GO:0005634];RNA nuclear export complex [GO:0042565]	nucleus	nucleic acid binding activity;other molecular function	nuclear export signal receptor activity [GO:0005049]	nucleic acid binding activity	cytoplasm [GO:0005737];nuclear export signal receptor activity [GO:0005049];nucleus [GO:0005634];regulation of protein export from nucleus [GO:0046825];RNA nuclear export complex [GO:0042565]	4	2	1206	134	6.38
1.46406	0.0343513	-1.04154	I1MCL4	Uncharacterized protein	other metabolic processes;protein metabolism	N-terminal peptidyl-methionine acetylation [GO:0017196]	protein metabolism	other cell component	cytoplasm [GO:0005737]	cytoplasm [GO:0005737]			NA	cytoplasm [GO:0005737];N-terminal peptidyl-methionine acetylation [GO:0017196]	14	10	901	102.8	6.95
2.85291	0.00140311	-1.05353	I1M1V8	Pyruvate decarboxylase			NA	cytosol	cytosol [GO:0005829]	cytosol	other molecular function	carboxy-lyase activity [GO:0016831];magnesium ion binding [GO:0000287];thiamine pyrophosphate binding [GO:0030976]	magnesium ion binding [GO:0000287]	carboxy-lyase activity [GO:0016831];cytosol [GO:0005829];magnesium ion binding [GO:0000287];thiamine pyrophosphate binding [GO:0030976]	52	16	589	63.4	6.11
2.60769	0.00246781	-1.05731	A0A0R0KN82	Uncharacterized protein			NA			NA	other molecular function		other molecular function		9	2	275	30	5.11
3.33373	0.00046373	-1.0605	I1KQ69	Uncharacterized protein	other metabolic processes;protein metabolism	translation [GO:0006412]	protein metabolism	translational apparatus	small ribosomal subunit [GO:0015935]	translational apparatus	nucleic acid binding activity;other molecular function	RNA binding [GO:0003723];structural constituent of ribosome [GO:0003735]	RNA binding [GO:0003723]	RNA binding [GO:0003723];small ribosomal subunit [GO:0015935];structural constituent of ribosome [GO:0003735];translation [GO:0006412]	55	6	155	17.4	10.4
2.14155	0.00721856	-1.06512	I1L3Z2	Glutamate decarboxylase	other metabolic processes	glutamate catabolic process [GO:0006538]	glutamate catabolic process [GO:0006538]	cytosol	cytosol [GO:0005829]	cytosol	other molecular function	glutamate decarboxylase activity [GO:0004351];pyridoxal phosphate binding [GO:0030170]	glutamate decarboxylase activity [GO:0004351]	cytosol [GO:0005829];glutamate catabolic process [GO:0006538];glutamate decarboxylase activity [GO:0004351];pyridoxal phosphate binding [GO:0030170]	18	6	498	56	5.81
1.50136	0.0315239	-1.07113	A1YNA0	Acyl-[acyl-carrier-protein] desaturase	other metabolic processes	fatty acid biosynthetic process [GO:0006633]	fatty acid biosynthetic process [GO:0006633]	other cell component	chloroplast [GO:0009507]	chloroplast [GO:0009507]	other molecular function	acyl-[acyl-carrier-protein] desaturase activity [GO:0045300];metal ion binding [GO:0046872]	metal ion binding [GO:0046872]	acyl-[acyl-carrier-protein] desaturase activity [GO:0045300];chloroplast [GO:0009507];fatty acid biosynthetic process [GO:0006633];metal ion binding [GO:0046872]	12	4	386	44	7.23
2.51623	0.00304626	-1.07237	I1JFX0	Usp domain-containing protein		response to abscisic acid [GO:0009737]	response to abscisic acid [GO:0009737]			NA			NA	response to abscisic acid [GO:0009737]	45	5	191	20.7	7.17
2.38745	0.00409784	-1.07435	I1KNN0	ATP-dependent 6-phosphofructokinase	other metabolic processes	fructose 6-phosphate metabolic process [GO:0006002]	fructose 6-phosphate metabolic process [GO:0006002]	cytosol;other cell component	cytoplasm [GO:0005737]	cytosol	kinase activity;other molecular function	6-phosphofructokinase activity [GO:0003872];ATP binding [GO:0005524];metal ion binding [GO:0046872]	ATP binding [GO:0005524]	6-phosphofructokinase activity [GO:0003872];ATP binding [GO:0005524];cytoplasm [GO:0005737];fructose 6-phosphate metabolic process [GO:0006002];metal ion binding [GO:0046872]	30	8	459	51.1	6.71
2.73798	0.00182817	-1.08123	I1MUP6	Uncharacterized protein			NA			NA			NA		14	5	420	46.4	5.11
1.82155	0.0150818	-1.08551	C6T374	VOC domain-containing protein			NA			NA			NA		37	2	139	15.4	5.69
1.86896	0.013522	-1.08856	C6SWS6	Uncharacterized protein		intracellular protein transport [GO:0006886];Rab protein signal transduction [GO:0032482]	signal transduction	other cytoplasmic organelle;other membranes	vacuolar membrane [GO:0005774]	vacuolar membrane [GO:0005774]	other molecular function	GTP binding [GO:0005525];GTPase activity [GO:0003924]	GTP binding [GO:0005525]	GTP binding [GO:0005525];GTPase activity [GO:0003924];intracellular protein transport [GO:0006886];Rab protein signal transduction [GO:0032482];vacuolar membrane [GO:0005774]	43	7	207	23.2	5.74
3.41069	0.000388424	-1.10135	A0A0R0J965	Uncharacterized protein			NA			NA	other molecular function	oxidoreductase activity [GO:0016491]	oxidoreductase activity [GO:0016491]	oxidoreductase activity [GO:0016491]	44	9	319	34.4	6.9
3.61864	0.000240636	-1.10554	A0A0R0I4F6	Uncharacterized protein			NA			NA	other molecular function	oxidoreductase activity [GO:0016491]	oxidoreductase activity [GO:0016491]	oxidoreductase activity [GO:0016491]	44	11	293	31.8	7.36
2.00221	0.00994914	-1.11741	I1JGR5	Uncharacterized protein	other biological processes;stress response	cellular response to heat [GO:0034605];cellular response to unfolded protein [GO:0034620];chaperone cofactor-dependent protein refolding [GO:0051085];protein refolding [GO:0042026];response to unfolded protein [GO:0006986]	stress response	other cell component	cytoplasm [GO:0005737]	cytoplasm [GO:0005737]	other molecular function	ATP binding [GO:0005524];ATPase activity [GO:0016887];ATPase activity, coupled [GO:0042623];heat shock protein binding [GO:0031072];misfolded protein binding [GO:0051787];protein folding chaperone [GO:0044183];unfolded protein binding [GO:0051082]	ATP binding [GO:0005524]	ATP binding [GO:0005524];ATPase activity [GO:0016887];ATPase activity, coupled [GO:0042623];cellular response to heat [GO:0034605];cellular response to unfolded protein [GO:0034620];chaperone cofactor-dependent protein refolding [GO:0051085];cytoplasm [GO:0005737];heat shock protein binding [GO:0031072];misfolded protein binding [GO:0051787];protein folding chaperone [GO:0044183];protein refoldin…	49	20	652	71.6	5.31
2.06218	0.00866605	-1.12186	A0A0R0ERN7	Peptidase_S9 domain-containing protein	protein metabolism		protein metabolism			NA	other molecular function	serine-type peptidase activity [GO:0008236]	serine-type peptidase activity [GO:0008236]	serine-type peptidase activity [GO:0008236]	11	6	964	107	6.4
3.31953	0.000479143	-1.12395	I1KXG9	Aldedh domain-containing protein			NA			NA	other molecular function	aldehyde dehydrogenase (NAD) activity [GO:0004029]	aldehyde dehydrogenase (NAD) activity [GO:0004029]	aldehyde dehydrogenase (NAD) activity [GO:0004029]	54	18	536	58.4	7.55
2.82779	0.00148665	-1.12685	I1J4D5	Uncharacterized protein	other metabolic processes		other metabolic processes			NA	other molecular function	O-methyltransferase activity [GO:0008171]	O-methyltransferase activity [GO:0008171]	O-methyltransferase activity [GO:0008171]	45	7	238	26.6	5.9
4.1031	7.8867e-05	-1.12954	Q9FQE4	Glutathione S-transferase GST 14 (Fragment)	other metabolic processes		other metabolic processes			NA	other molecular function	glutathione transferase activity [GO:0004364]	glutathione transferase activity [GO:0004364]	glutathione transferase activity [GO:0004364]	10	2	219	25.3	7.59
4.00563	9.87129e-05	-1.13056	B3TDK4	Lipoxygenase	other metabolic processes	oxylipin biosynthetic process [GO:0031408]	oxylipin biosynthetic process [GO:0031408]	other cell component		other cell component	other molecular function	metal ion binding [GO:0046872];oxidoreductase activity, acting on single donors with incorporation of molecular oxygen, incorporation of two atoms of oxygen [GO:0016702]	metal ion binding [GO:0046872]	metal ion binding [GO:0046872];oxidoreductase activity, acting on single donors with incorporation of molecular oxygen, incorporation of two atoms of oxygen [GO:0016702];oxylipin biosynthetic process [GO:0031408]	62	39	839	94.4	6.33
2.41637	0.00383382	-1.13131	C6T3V8	Uncharacterized protein	other biological processes		other biological processes			NA	enzyme regulator activity	endopeptidase inhibitor activity [GO:0004866]	enzyme regulator activity	endopeptidase inhibitor activity [GO:0004866]	20	3	204	22.1	9.33
1.50584	0.0312006	-1.14868	I1NCQ4	L-gulonolactone oxidase	other metabolic processes		other metabolic processes	other membranes	membrane [GO:0016020]	membrane [GO:0016020]	other molecular function	D-arabinono-1,4-lactone oxidase activity [GO:0003885];FAD binding [GO:0071949]	FAD binding [GO:0071949]	D-arabinono-1,4-lactone oxidase activity [GO:0003885];FAD binding [GO:0071949];membrane [GO:0016020]	4	2	589	65.7	7.42
1.63552	0.023146	-1.15371	C6SZH2	SKP1-like protein	other metabolic processes;protein metabolism	protein ubiquitination [GO:0016567];SCF-dependent proteasomal ubiquitin-dependent protein catabolic process [GO:0031146]	protein metabolism	nucleus;other cell component	cytoplasm [GO:0005737];nucleus [GO:0005634]	nucleus	other molecular function	cullin family protein binding [GO:0097602]	cullin family protein binding [GO:0097602]	cullin family protein binding [GO:0097602];cytoplasm [GO:0005737];nucleus [GO:0005634];protein ubiquitination [GO:0016567];SCF-dependent proteasomal ubiquitin-dependent protein catabolic process [GO:0031146]	55	5	155	17.5	4.63
2.95048	0.00112077	-1.15425	I1MEH8	Uncharacterized protein			NA			NA			NA		54	8	200	22.2	7.2
2.34381	0.00453095	-1.15893	C6TBF6	Usp domain-containing protein			NA			NA			NA		20	3	177	19.5	7.27
2.29218	0.00510288	-1.16323	A0A0R0L186	SHSP domain-containing protein	cell organization and biogenesis;other biological processes;stress response	protein complex oligomerization [GO:0051259];protein folding [GO:0006457];response to heat [GO:0009408];response to hydrogen peroxide [GO:0042542];response to reactive oxygen species [GO:0000302];response to salt stress [GO:0009651]	cell organization and biogenesis			NA	other molecular function	protein self-association [GO:0043621];unfolded protein binding [GO:0051082]	unfolded protein binding [GO:0051082]	protein complex oligomerization [GO:0051259];protein folding [GO:0006457];protein self-association [GO:0043621];response to heat [GO:0009408];response to hydrogen peroxide [GO:0042542];response to reactive oxygen species [GO:0000302];response to salt stress [GO:0009651];unfolded protein binding [GO:0051082]	18	3	153	17.3	7.42
2.77971	0.00166071	-1.16339	F9W2W3	1,4-alpha-glucan branching enzyme	other metabolic processes	glycogen biosynthetic process [GO:0005978]	glycogen biosynthetic process [GO:0005978]	other cell component		other cell component	other molecular function	1,4-alpha-glucan branching enzyme activity [GO:0003844];cation binding [GO:0043169];hydrolase activity, hydrolyzing O-glycosyl compounds [GO:0004553]	hydrolase activity	1,4-alpha-glucan branching enzyme activity [GO:0003844];cation binding [GO:0043169];glycogen biosynthetic process [GO:0005978];hydrolase activity, hydrolyzing O-glycosyl compounds [GO:0004553]	5	3	883	100	5.1
3.10783	0.000780139	-1.1714	Q9SWB6	Probable bifunctional TENA-E protein	other metabolic processes	thiamine biosynthetic process [GO:0009228];thiamine diphosphate biosynthetic process [GO:0009229]	NA	cytosol	cytosol [GO:0005829]	cytosol	other molecular function	thiaminase activity [GO:0050334]	thiaminase activity [GO:0050334]	cytosol [GO:0005829];thiaminase activity [GO:0050334];thiamine biosynthetic process [GO:0009228];thiamine diphosphate biosynthetic process [GO:0009229]	34	7	229	26	5.35
4.07285	8.4557e-05	-1.17753	I1LN49	Uncharacterized protein			NA			NA			NA		39	7	234	27	7.06
1.51222	0.0307456	-1.1777	I1NCA0	Chitinase	other metabolic processes;RNA metabolism OR transcription;stress response	defense response to bacterium [GO:0042742];defense response to fungus [GO:0050832]	stress response			NA	other molecular function	chitin binding [GO:0008061]	chitin binding [GO:0008061]	chitin binding [GO:0008061];defense response to bacterium [GO:0042742];defense response to fungus [GO:0050832]	18	2	211	22.5	5.86
1.89065	0.0128631	-1.17802	A0A0R0J877	Uncharacterized protein			NA			NA			NA		14	3	236	26.7	7.49
2.10555	0.00784241	-1.18249	I1JXA0	Uncharacterized protein	cell cycle OR cell proliferation;cell organization and biogenesis;other metabolic processes;protein metabolism;stress response;transport	autophagosome maturation [GO:0097352];ER-associated misfolded protein catabolic process [GO:0071712];macroautophagy [GO:0016236];mitotic spindle disassembly [GO:0051228];retrograde protein transport, ER to cytosol [GO:0030970];ubiquitin-dependent ERAD pathway [GO:0030433]	cell organization and biogenesis	cytosol;ER/Golgi;nucleus;other membranes	cytoplasm [GO:0005737];cytosol [GO:0005829];nucleus [GO:0005634];VCP-NPL4-UFD1 AAA ATPase complex [GO:0034098]	cytosol	other molecular function	ATP binding [GO:0005524];ATPase activity [GO:0016887];polyubiquitin modification-dependent protein binding [GO:0031593]	ATP binding [GO:0005524]	ATP binding [GO:0005524];ATPase activity [GO:0016887];autophagosome maturation [GO:0097352];cytoplasm [GO:0005737];cytosol [GO:0005829];ER-associated misfolded protein catabolic process [GO:0071712];macroautophagy [GO:0016236];mitotic spindle disassembly [GO:0051228];nucleus [GO:0005634];polyubiquitin modification-dependent protein binding [GO:0031593];retrograde protein transport, ER to cytosol …	41	26	814	90.8	5.24
1.95847	0.0110035	-1.1847	I1LWH3	Procollagen-proline 4-dioxygenase	other metabolic processes;protein metabolism	peptidyl-proline hydroxylation to 4-hydroxy-L-proline [GO:0018401]	protein metabolism	ER/Golgi;other membranes	endoplasmic reticulum [GO:0005783]	ER/Golgi	other molecular function	iron ion binding [GO:0005506];L-ascorbic acid binding [GO:0031418];oxidoreductase activity, acting on paired donors, with incorporation or reduction of molecular oxygen [GO:0016705]	iron ion binding [GO:0005506]	endoplasmic reticulum [GO:0005783];iron ion binding [GO:0005506];L-ascorbic acid binding [GO:0031418];oxidoreductase activity, acting on paired donors, with incorporation or reduction of molecular oxygen [GO:0016705];peptidyl-proline hydroxylation to 4-hydroxy-L-proline [GO:0018401]	8	2	318	35.3	6.6
3.08427	0.000823627	-1.1883	K7K653	Uncharacterized protein			NA			NA			NA		9	3	606	65.1	8.31
2.48031	0.00330896	-1.19085	C6TAT2	Tau class glutathione S-transferase	other metabolic processes	glutathione metabolic process [GO:0006749]	glutathione metabolic process [GO:0006749]	other cell component	cytoplasm [GO:0005737]	cytoplasm [GO:0005737]	other molecular function	glutathione transferase activity [GO:0004364]	glutathione transferase activity [GO:0004364]	cytoplasm [GO:0005737];glutathione metabolic process [GO:0006749];glutathione transferase activity [GO:0004364]	19	4	219	25.6	5.74
4.52453	2.98864e-05	-1.1911	C6SWV3	Uncharacterized protein			NA			NA			NA		43	7	245	27.6	6.1
2.36262	0.00433892	-1.19659	P01064	Bowman-Birk type proteinase inhibitor D-II	other biological processes		other biological processes	non-structural extracellular	extracellular region [GO:0005576]	non-structural extracellular	enzyme regulator activity	serine-type endopeptidase inhibitor activity [GO:0004867]	enzyme regulator activity	extracellular region [GO:0005576];serine-type endopeptidase inhibitor activity [GO:0004867]	30	2	83	9.5	5.14
2.64417	0.00226899	-1.1991	I1KWD8	Uncharacterized protein			NA	other cell component	intracellular membrane-bounded organelle [GO:0043231]	intracellular membrane-bounded organelle [GO:0043231]	other molecular function	quercetin 3-O-glucosyltransferase activity [GO:0080043];quercetin 7-O-glucosyltransferase activity [GO:0080044];UDP-glycosyltransferase activity [GO:0008194]	NA	intracellular membrane-bounded organelle [GO:0043231];quercetin 3-O-glucosyltransferase activity [GO:0080043];quercetin 7-O-glucosyltransferase activity [GO:0080044];UDP-glycosyltransferase activity [GO:0008194]	24	5	451	49.8	5.27
1.63007	0.0234384	-1.20063	K7K4G2	Cupin type-1 domain-containing protein			NA			NA		nutrient reservoir activity [GO:0045735]	nutrient reservoir activity [GO:0045735]	nutrient reservoir activity [GO:0045735]	4	2	614	71.7	5.49
1.41884	0.0381202	-1.20622	C6TDB4	SHSP domain-containing protein			NA			NA			NA		13	3	225	25.6	7.49
2.20488	0.0062391	-1.21012	I1M005	Formate dehydrogenase, mitochondrial	other metabolic processes	formate catabolic process [GO:0042183]	formate catabolic process [GO:0042183]	mitochondrion;other cell component	mitochondrion [GO:0005739]	mitochondrion	other molecular function	formate dehydrogenase (NAD+) activity [GO:0008863];NAD binding [GO:0051287];oxidoreductase activity, acting on the CH-OH group of donors, NAD or NADP as acceptor [GO:0016616]	NAD binding [GO:0051287]	formate catabolic process [GO:0042183];formate dehydrogenase (NAD+) activity [GO:0008863];mitochondrion [GO:0005739];NAD binding [GO:0051287];oxidoreductase activity, acting on the CH-OH group of donors, NAD or NADP as acceptor [GO:0016616]	58	14	381	41.9	7.59
1.51528	0.0305294	-1.21278	A0A0R0LK39	Uncharacterized protein	stress response		stress response	non-structural extracellular		non-structural extracellular			NA		38	7	249	27.2	6.89
3.29895	0.000502396	-1.22897	I1L6I6	Cysteine synthase	other metabolic processes	cyanide metabolic process [GO:0019499];cysteine biosynthetic process from serine [GO:0006535]	amino acid metabolic process [GO:0006520]	mitochondrion;other cell component	cytoplasm [GO:0005737];mitochondrion [GO:0005739]	mitochondrion	other molecular function	cysteine synthase activity [GO:0004124];L-3-cyanoalanine synthase activity [GO:0050017];pyridoxal phosphate binding [GO:0030170]	cysteine synthase activity [GO:0004124]	cyanide metabolic process [GO:0019499];cysteine biosynthetic process from serine [GO:0006535];cysteine synthase activity [GO:0004124];cytoplasm [GO:0005737];L-3-cyanoalanine synthase activity [GO:0050017];mitochondrion [GO:0005739];pyridoxal phosphate binding [GO:0030170]	29	9	373	40.1	7.56
2.65442	0.00221607	-1.23026	K7LTM9	Uncharacterized protein	cell cycle OR cell proliferation;cell organization and biogenesis;other metabolic processes;protein metabolism;stress response;transport	autophagosome maturation [GO:0097352];ER-associated misfolded protein catabolic process [GO:0071712];macroautophagy [GO:0016236];mitotic spindle disassembly [GO:0051228];retrograde protein transport, ER to cytosol [GO:0030970];ubiquitin-dependent ERAD pathway [GO:0030433]	stress response	cytosol;ER/Golgi;nucleus;other membranes	cytoplasm [GO:0005737];cytosol [GO:0005829];nucleus [GO:0005634];VCP-NPL4-UFD1 AAA ATPase complex [GO:0034098]	cytosol	other molecular function	ATP binding [GO:0005524];ATPase activity [GO:0016887];polyubiquitin modification-dependent protein binding [GO:0031593]	ATP binding [GO:0005524]	ATP binding [GO:0005524];ATPase activity [GO:0016887];autophagosome maturation [GO:0097352];cytoplasm [GO:0005737];cytosol [GO:0005829];ER-associated misfolded protein catabolic process [GO:0071712];macroautophagy [GO:0016236];mitotic spindle disassembly [GO:0051228];nucleus [GO:0005634];polyubiquitin modification-dependent protein binding [GO:0031593];retrograde protein transport, ER to cytosol …	25	16	724	81.5	6.13
3.78722	0.000163224	-1.24379	C6TCK6	Uncharacterized protein			NA			NA			NA		13	2	236	25.8	6.86
2.61052	0.00245174	-1.24608	I1L957	Uncharacterized protein			NA			NA			NA		31	9	449	48.8	6.42
1.76664	0.0171144	-1.25285	O49857	Epoxide hydrolase			NA			NA	other molecular function	hydrolase activity [GO:0016787]	hydrolase activity [GO:0016787]	hydrolase activity [GO:0016787]	19	5	341	39.1	5.66
2.61316	0.0024369	-1.26349	C6TLE0	DUF3700 domain-containing protein			NA			NA			NA		20	4	254	28.1	6.79
2.47472	0.00335181	-1.26404	C6T4X0	Usp domain-containing protein			NA			NA			NA		25	4	182	20	6.55
4.38514	4.11967e-05	-1.27054	I1M596	Lipoxygenase	other metabolic processes	oxylipin biosynthetic process [GO:0031408]	oxylipin biosynthetic process [GO:0031408]	other cell component		other cell component	other molecular function	metal ion binding [GO:0046872];oxidoreductase activity, acting on single donors with incorporation of molecular oxygen, incorporation of two atoms of oxygen [GO:0016702]	metal ion binding [GO:0046872]	metal ion binding [GO:0046872];oxidoreductase activity, acting on single donors with incorporation of molecular oxygen, incorporation of two atoms of oxygen [GO:0016702];oxylipin biosynthetic process [GO:0031408]	59	34	866	97.2	6.67
2.24139	0.00573606	-1.28677	K7LQ70	Poly [ADP-ribose] polymerase	other metabolic processes;protein metabolism	protein ADP-ribosylation [GO:0006471]	protein metabolism	nucleus		nucleus	other molecular function	NAD+ ADP-ribosyltransferase activity [GO:0003950]	NAD+ ADP-ribosyltransferase activity [GO:0003950]	NAD+ ADP-ribosyltransferase activity [GO:0003950];protein ADP-ribosylation [GO:0006471]	26	12	793	88.9	5.38
1.83415	0.0146506	-1.28917	C6TIW2	Oxidored_FMN domain-containing protein (Fragment)			NA			NA	other molecular function	FMN binding [GO:0010181];oxidoreductase activity [GO:0016491]	oxidoreductase activity [GO:0016491]	FMN binding [GO:0010181];oxidoreductase activity [GO:0016491]	56	11	226	25.1	7.24
3.9858	0.000103323	-1.29129	A0A0R0L177	CASP-like protein			NA	other membranes;plasma membrane	integral component of membrane [GO:0016021];plasma membrane [GO:0005886]	plasma membrane			NA	integral component of membrane [GO:0016021];plasma membrane [GO:0005886]	25	4	169	18.2	5.15
3.29588	0.000505959	-1.29328	A0A0R0H3L4	Poly [ADP-ribose] polymerase	other metabolic processes;protein metabolism	protein ADP-ribosylation [GO:0006471]	protein metabolism	nucleus		nucleus	other molecular function	NAD+ ADP-ribosyltransferase activity [GO:0003950]	NAD+ ADP-ribosyltransferase activity [GO:0003950]	NAD+ ADP-ribosyltransferase activity [GO:0003950];protein ADP-ribosylation [GO:0006471]	20	10	815	91.6	5.59
1.46783	0.0340545	-1.2976	C6ZS34	TIR-NBS-LRR type disease resistance protein	signal transduction	signal transduction [GO:0007165]	signal transduction			NA			NA	signal transduction [GO:0007165]	10	2	257	29.8	7.96
2.79823	0.00159137	-1.30379	I1JAU2	Uncharacterized protein	other biological processes;stress response	cellular response to heat [GO:0034605];cellular response to unfolded protein [GO:0034620];chaperone cofactor-dependent protein refolding [GO:0051085];protein refolding [GO:0042026];response to unfolded protein [GO:0006986]	stress response	other cell component	cytoplasm [GO:0005737]	cytoplasm [GO:0005737]	other molecular function	ATP binding [GO:0005524];ATPase activity [GO:0016887];ATPase activity, coupled [GO:0042623];heat shock protein binding [GO:0031072];misfolded protein binding [GO:0051787];protein folding chaperone [GO:0044183];unfolded protein binding [GO:0051082]	ATP binding [GO:0005524]	ATP binding [GO:0005524];ATPase activity [GO:0016887];ATPase activity, coupled [GO:0042623];cellular response to heat [GO:0034605];cellular response to unfolded protein [GO:0034620];chaperone cofactor-dependent protein refolding [GO:0051085];cytoplasm [GO:0005737];heat shock protein binding [GO:0031072];misfolded protein binding [GO:0051787];protein folding chaperone [GO:0044183];protein refoldin…	4	2	571	62	5.68
1.58081	0.026254	-1.31044	A0A0R0KEL8	Uncharacterized protein			NA			NA	other molecular function	pyridoxal phosphate binding [GO:0030170];transaminase activity [GO:0008483]	NA	pyridoxal phosphate binding [GO:0030170];transaminase activity [GO:0008483]	39	7	306	33	6.73
3.01415	0.000967942	-1.3182	I1MRM5	Bet_v_1 domain-containing protein	other biological processes;signal transduction;stress response	abscisic acid-activated signaling pathway [GO:0009738];defense response [GO:0006952];regulation of protein serine/threonine phosphatase activity [GO:0080163];response to biotic stimulus [GO:0009607]	signal transduction	nucleus;other cell component	cytoplasm [GO:0005737];nucleus [GO:0005634]	nucleus	enzyme regulator activity;other molecular function	abscisic acid binding [GO:0010427];protein phosphatase inhibitor activity [GO:0004864];signaling receptor activity [GO:0038023]	enzyme regulator activity;other molecular function	abscisic acid binding [GO:0010427];abscisic acid-activated signaling pathway [GO:0009738];cytoplasm [GO:0005737];defense response [GO:0006952];nucleus [GO:0005634];protein phosphatase inhibitor activity [GO:0004864];regulation of protein serine/threonine phosphatase activity [GO:0080163];response to biotic stimulus [GO:0009607];signaling receptor activity [GO:0038023]	78	9	157	17.1	5.07
2.91338	0.00122074	-1.34047	I1KEA6	Uncharacterized protein			NA	other cell component	cytoplasm [GO:0005737]	cytoplasm [GO:0005737]	other molecular function	acid-amino acid ligase activity [GO:0016881];indole-3-acetic acid amido synthetase activity [GO:0010279]	acid-amino acid ligase activity [GO:0016881]	acid-amino acid ligase activity [GO:0016881];cytoplasm [GO:0005737];indole-3-acetic acid amido synthetase activity [GO:0010279]	6	2	609	68.8	6.83
2.1466	0.00713517	-1.34877	I1J9Q7	Glutamate dehydrogenase	other metabolic processes	cellular amino acid metabolic process [GO:0006520]	cellular amino acid metabolic process [GO:0006520]	mitochondrion		mitochondrion	other molecular function	nucleotide binding [GO:0000166];oxidoreductase activity, acting on the CH-NH2 group of donors, NAD or NADP as acceptor [GO:0016639]	nucleotide binding [GO:0000166]	cellular amino acid metabolic process [GO:0006520];nucleotide binding [GO:0000166];oxidoreductase activity, acting on the CH-NH2 group of donors, NAD or NADP as acceptor [GO:0016639]	16	5	411	44.8	6.4
3.12232	0.000754543	-1.34925	A0A0R0GZ36	Uncharacterized protein	other biological processes;other metabolic processes;protein metabolism;stress response		stress response	nucleus;other cell component		nucleus	enzyme regulator activity;other molecular function		enzyme regulator activity;other molecular function		22	6	377	41.3	5.99
1.84033	0.0144436	-1.35461	A0A0R0KSS1	PKS_ER domain-containing protein			NA			NA	other molecular function	oxidoreductase activity [GO:0016491]	oxidoreductase activity [GO:0016491]	oxidoreductase activity [GO:0016491]	37	10	343	37.9	6.27
2.09675	0.00800303	-1.3613	I1J4W3	Phosphoenolpyruvate carboxykinase (ATP)	other metabolic processes	gluconeogenesis [GO:0006094]	gluconeogenesis [GO:0006094]	cytosol	cytosol [GO:0005829]	cytosol	other molecular function	ATP binding [GO:0005524];phosphoenolpyruvate carboxykinase (ATP) activity [GO:0004612]	ATP binding [GO:0005524]	ATP binding [GO:0005524];cytosol [GO:0005829];gluconeogenesis [GO:0006094];phosphoenolpyruvate carboxykinase (ATP) activity [GO:0004612]	21	9	660	73.1	7.23
1.38559	0.0411538	-1.37532	I1NH45	Peroxidase	other biological processes;other metabolic processes;stress response	hydrogen peroxide catabolic process [GO:0042744];response to oxidative stress [GO:0006979]	stress response	non-structural extracellular;other cell component	extracellular region [GO:0005576];plant-type cell wall [GO:0009505];plasmodesma [GO:0009506]	non-structural extracellular	other molecular function	heme binding [GO:0020037];metal ion binding [GO:0046872];peroxidase activity [GO:0004601]	heme binding [GO:0020037]	extracellular region [GO:0005576];heme binding [GO:0020037];hydrogen peroxide catabolic process [GO:0042744];metal ion binding [GO:0046872];peroxidase activity [GO:0004601];plant-type cell wall [GO:0009505];plasmodesma [GO:0009506];response to oxidative stress [GO:0006979]	11	4	356	38.9	7.23
4.38106	4.15858e-05	-1.37764	B3TDK6	Lipoxygenase	other metabolic processes	oxylipin biosynthetic process [GO:0031408]	oxylipin biosynthetic process [GO:0031408]	other cell component		other cell component	other molecular function	metal ion binding [GO:0046872];oxidoreductase activity, acting on single donors with incorporation of molecular oxygen, incorporation of two atoms of oxygen [GO:0016702]	metal ion binding [GO:0046872]	metal ion binding [GO:0046872];oxidoreductase activity, acting on single donors with incorporation of molecular oxygen, incorporation of two atoms of oxygen [GO:0016702];oxylipin biosynthetic process [GO:0031408]	61	48	857	96.7	6.58
3.86116	0.00013767	-1.39666	A0A0R0KKR3	Aldo_ket_red domain-containing protein			NA	cytosol		cytosol	other molecular function	oxidoreductase activity [GO:0016491]	oxidoreductase activity [GO:0016491]	oxidoreductase activity [GO:0016491]	62	16	313	35.2	6.46
2.88008	0.001318	-1.40464	O23957	Dehydrin	other biological processes;stress response	cold acclimation [GO:0009631];response to abscisic acid [GO:0009737];response to water deprivation [GO:0009414]	stress response	cytosol	cytosol [GO:0005829]	cytosol			NA	cold acclimation [GO:0009631];cytosol [GO:0005829];response to abscisic acid [GO:0009737];response to water deprivation [GO:0009414]	18	3	166	17.3	9.23
2.81435	0.00153339	-1.41165	A0A0R4J4G9	SHSP domain-containing protein			NA			NA			NA		22	4	211	23.7	6.98
3.66614	0.000215707	-1.41859	A0A0R4J455	Uricase	other metabolic processes	purine nucleobase metabolic process [GO:0006144];urate catabolic process [GO:0019628]	NA	other cytoplasmic organelle	peroxisome [GO:0005777]	peroxisome [GO:0005777]	other molecular function	urate oxidase activity [GO:0004846]	urate oxidase activity [GO:0004846]	peroxisome [GO:0005777];purine nucleobase metabolic process [GO:0006144];urate catabolic process [GO:0019628];urate oxidase activity [GO:0004846]	46	10	309	35.1	8.29
1.73034	0.0186065	-1.4214	D3G9M3	Vascular associated death 1	other biological processes	negative regulation of programmed cell death [GO:0043069]	negative regulation of programmed cell death [GO:0043069]	other membranes	integral component of membrane [GO:0016021]	integral component of membrane [GO:0016021]			NA	integral component of membrane [GO:0016021];negative regulation of programmed cell death [GO:0043069]	7	3	618	70.5	5.74
2.17168	0.0067347	-1.42821	Q9SWB2	Seed maturation protein PM41			NA			NA			NA		31	2	78	8.2	4.97
2.13019	0.00740989	-1.43131	I1L7V6	Usp domain-containing protein			NA			NA			NA		15	2	164	17.6	7.87
1.51251	0.0307252	-1.43583	I1N0Y1	Imidazole glycerol phosphate synthase hisHF	other metabolic processes	glutamine metabolic process [GO:0006541];histidine biosynthetic process [GO:0000105]	amino acid metabolic process [GO:0006520]	other cell component	chloroplast [GO:0009507]	chloroplast [GO:0009507]	other molecular function	glutaminase activity [GO:0004359];imidazoleglycerol-phosphate synthase activity [GO:0000107];oxo-acid-lyase activity [GO:0016833]	glutaminase activity [GO:0004359]	chloroplast [GO:0009507];glutaminase activity [GO:0004359];glutamine metabolic process [GO:0006541];histidine biosynthetic process [GO:0000105];imidazoleglycerol-phosphate synthase activity [GO:0000107];oxo-acid-lyase activity [GO:0016833]	35	13	580	62.9	6.04
1.63223	0.0233222	-1.4639	C6T7J5	Aldo_ket_red domain-containing protein			NA			NA	other molecular function	oxidoreductase activity [GO:0016491]	oxidoreductase activity [GO:0016491]	oxidoreductase activity [GO:0016491]	32	9	312	35.1	6.14
1.30496	0.0495498	-1.51726	I1MZT2	Peroxidase	other biological processes;other metabolic processes;stress response	hydrogen peroxide catabolic process [GO:0042744];response to oxidative stress [GO:0006979]	stress response	non-structural extracellular	extracellular region [GO:0005576]	non-structural extracellular	other molecular function	heme binding [GO:0020037];metal ion binding [GO:0046872];peroxidase activity [GO:0004601]	heme binding [GO:0020037]	extracellular region [GO:0005576];heme binding [GO:0020037];hydrogen peroxide catabolic process [GO:0042744];metal ion binding [GO:0046872];peroxidase activity [GO:0004601];response to oxidative stress [GO:0006979]	12	3	322	35.1	8.59
2.06477	0.00861444	-1.52051	I1JLC8	Protein SLE2	other biological processes	protein stabilization [GO:0050821];response to abscisic acid [GO:0009737]	stress response	cytosol	cytosol [GO:0005829]	cytosol			NA	cytosol [GO:0005829];protein stabilization [GO:0050821];response to abscisic acid [GO:0009737]	41	5	105	11.5	5.6
3.18858	0.000647775	-1.54282	O22378	Metallothionein-II protein			NA			NA	other molecular function	zinc ion binding [GO:0008270]	zinc ion binding [GO:0008270]	zinc ion binding [GO:0008270]	22	2	85	8.3	7.33
2.57269	0.00267492	-1.57259	K7MIR3	Phosphopyruvate hydratase	other metabolic processes	glycolytic process [GO:0006096]	glycolytic process [GO:0006096]	cytosol	phosphopyruvate hydratase complex [GO:0000015]	cytosol	other molecular function	magnesium ion binding [GO:0000287];phosphopyruvate hydratase activity [GO:0004634]	magnesium ion binding [GO:0000287]	glycolytic process [GO:0006096];magnesium ion binding [GO:0000287];phosphopyruvate hydratase activity [GO:0004634];phosphopyruvate hydratase complex [GO:0000015]	61	14	353	38.3	6.8
2.24959	0.00562873	-1.58699	Q39805	Dehydrin-like protein			NA			NA			NA		18	2	226	23.7	6.58
3.45918	0.000347393	-1.59456	C6SVT0	Usp domain-containing protein			NA			NA			NA		48	7	162	18	7.15
[truncated: 48 more rows]
